1 **Promoter scanning during transcription initiation in *Saccharomyces cerevisiae*: Pol II in**  
2 **the “shooting gallery”**

3 Chenxi Qiu<sup>1,a,§</sup>, Huiyan Jin<sup>1,b,§</sup>, Irina Vvedenskaya<sup>2,3</sup>, Jordi Abante Llenas<sup>4,c</sup>, Tingting Zhao<sup>5</sup>,  
4 Indranil Malik<sup>1,d</sup>, Scott L. Schwartz<sup>6,e</sup>, Ping Cui<sup>1</sup>, Pavel Čabart<sup>1,f</sup>, Kang Hoo Han<sup>7</sup>, Richard P.  
5 Metz<sup>6</sup>, Charles D. Johnson<sup>6</sup>, Sing-Hoi Sze<sup>1,8</sup>, B. Franklin Pugh<sup>7</sup>, Bryce E. Nickels<sup>2,3</sup>, Craig D.  
6 Kaplan<sup>5\*</sup>

7 <sup>1</sup>Department of Biochemistry and Biophysics, Texas A&M University, College Station, TX  
8 77843-2128

9 <sup>2</sup>Waksman Institute of Microbiology, Rutgers University, Piscataway, NJ, 08854

10 <sup>3</sup>Department of Genetics, Rutgers University, Piscataway, NJ, 08854

11 <sup>4</sup>Department of Electrical and Computer Engineering, Texas A&M University, College Station,  
12 TX 77843-3128

13 <sup>5</sup>Department of Biological Sciences, University of Pittsburgh, Pittsburgh, PA, 15260

14 <sup>6</sup>Genomics and Bioinformatics Service, Texas A&M AgriLife, College Station, TX 77845

15 <sup>7</sup>Department of Biochemistry and Molecular Biology, Penn State University, University Park, PA  
16 16802

17 <sup>8</sup>Department of Computer Science and Engineering, Texas A&M University, College Station, TX  
18 77843-3127

19 \*To whom correspondence should be addressed.

20 §Equal contributions

21 <sup>a</sup>Current Address: Department of Medicine, Division of Translational Therapeutics, Beth Israel  
22 Deaconess Medical Center, Harvard Medical School, Boston, MA 02215

23 <sup>b</sup>Current Address: Roche Nimblegen, Madison, WI 53719

24 <sup>c</sup>Current Address: Whitaker Biomedical Engineering Institute, Johns Hopkins University,  
25 Baltimore, MD 21218

26 <sup>d</sup>Current Address: Department of Neurology, University of Michigan, Ann Arbor, MI, 48109, USA

27 <sup>e</sup>Current Address: Covera Health, New York City, NY 10017

28 <sup>f</sup>Current Address: First Faculty of Medicine, Charles University, BIOCEV, 252 42 Vestec, Czech  
29 Republic

30

31

32

33 **ABSTRACT**

34

35 **Background**

36 The majority of eukaryotic promoters utilize multiple transcription start sites (TSSs). How  
37 multiple TSSs are specified at individual promoters across eukaryotes is not understood for  
38 most species. In *S. cerevisiae*, a preinitiation complex comprised of Pol II and conserved  
39 general transcription factors (GTFs) assembles and opens DNA upstream of TSSs. Evidence  
40 from model promoters indicates that the PIC scans from upstream to downstream to identify  
41 TSSs. Prior results suggest that TSS distributions at promoters where scanning occurs shift in a  
42 polar fashion upon alteration in Pol II catalytic activity or GTF function.

43 **Results**

44 To determine extent of promoter scanning across promoter classes in *S. cerevisiae*, we  
45 perturbed Pol II catalytic activity and GTF function and analyzed their effects on TSS usage  
46 genome-wide. We find that alterations to Pol II, TFIIB, or TFIIF function widely alter the initiation  
47 landscape consistent with promoter scanning operating at all yeast promoters, regardless of  
48 promoter class. Promoter architecture, however, can determine extent of promoter sensitivity to  
49 altered Pol II activity in ways that are predicted by a scanning model.

50 **Conclusions**

51 Our observations coupled with previous data validate this scanning model for Pol II initiation in  
52 yeast – which we term the “shooting gallery”. In this model, Pol II catalytic activity, and the rate  
53 and processivity of Pol II scanning together with promoter sequence determine the distribution  
54 of TSSs and their usage. Comparison of TSS distributions and their relationship to promoter  
55 sequence among other eukaryotes suggest some, but not all, share characteristics of *S.*  
56 *cerevisiae*.

57

58

## 59 BACKGROUND

60 Gene expression can be regulated at all levels, and its proper control is critical for cellular  
61 function. Transcription regulation has been of intense interest for decades as it determines how  
62 much RNA is synthesized for a given gene or locus. Much regulation occurs at the first step in  
63 transcription, initiation. A multitude of signals can be integrated with the activities of  
64 transcriptional regulators that converge on individual gene promoters. Subsequent to the  
65 integration of regulatory information, RNA Polymerase II (Pol II) and general transcription  
66 factors (GTFs) must recognize core promoters to together initiate transcription at specific  
67 sequences, transcription start sites (TSSs). As with any biochemical process, the efficiency of  
68 individual steps will shape the overall output. Thus, determinants of core promoter output during  
69 initiation, both overall expression level and the exact position of transcription start sites (TSSs),  
70 will be affected by the efficiency of biochemical events during initiation. How different core  
71 promoters modulate biochemical steps in initiation, and the nature of their functional interactions  
72 with the initiation machinery, are not fully understood.

73 Classes of eukaryotic core promoters can be distinguished by DNA sequence motifs and  
74 chromatin structure (reviews of the core promoter over time [1-6]). These features together  
75 comprise a promoter's architecture, which may also correlate with differential recruitment or  
76 requirement for particular GTF complexes. A theme across eukaryotes is that core promoters  
77 can be broadly separated into two main classes by examination of architectural features and  
78 factor requirements. A number of studies indicate that the most common eukaryotic promoters  
79 are nucleosome-depleted regions (NDRs) flanked by positioned nucleosomes, which can  
80 support divergent transcription through assembly of pre-initiation complexes (PICs) proximal to  
81 flanking nucleosomes (with exceptions)[7-18]. We will adhere to the definition of "core promoter"  
82 as representing the DNA elements and chromatin structure that facilitate transcription in one  
83 direction, to avoid definitional confusion that a "promoter" inherently drives divergent  
84 transcription [19-21]. In yeast, promoter classes have been distinguished in many ways with the  
85 end result generally being two main classes of promoter are recognized [9-11, 22]. These  
86 classes are distinguished by the presence or absence of a consensus TATA element [23, 24],  
87 presence or absence of stereotypical nucleosome organization [11], enrichment for specific  
88 transcription factor binding [7, 25, 26], enrichment for non-TATA sequence motifs [27, 28], and  
89 differential sensitivity to mutations in GTFs or transcription coactivators [23, 25, 26]. Core  
90 promoters attached to defined NDRs tend to lack canonical TATA-elements. Conversely, in  
91 yeast and other eukaryotes, core promoters with TATA elements can lack stereotypical  
92 nucleosome organization and may have nucleosomes positioned over the TATA box in the  
93 absence of gene activation. While there have been a number of additional core promoter  
94 elements identified in other organisms, especially *Drosophila melanogaster* [29], we will focus  
95 on the distinction provided by presence or absence of TATA-elements.

96 The TATA element serves as a platform for core promoter binding of the TATA-Binding Protein  
97 (TBP). TBP recognition of promoter DNA is assumed to be critical for PIC formation and Pol II  
98 promoter specificity. Functional distinction in promoter classes is supported by studies showing  
99 differential factor recruitment and requirements between them, with TATA promoters showing  
100 higher SAGA dependence and reduced Taf1 (a TFIID subunit) recruitment [23-26], though more  
101 recent data have been interpreted as both SAGA and TFIID functioning at all yeast promoters  
102 [30, 31]. Conversely, TATA-less promoters show higher Taf1 recruitment and greater  
103 requirement for TBP-Associated Factor (TAF) function. Given differences in reported factor  
104 requirements and promoter architectures, it is important to understand the mechanistic  
105 differences between promoters and how these relate to gene regulation.

106 TSS selection in *Saccharomyces cerevisiae* has been used as a model to understand how  
107 initiation factors collaborate to promote initiation [32, 33]. The vast majority of yeast core

108 promoters specify multiple TSSs [34-36], and multiple TSS usage is now known to be common  
109 to the majority of core promoters in other eukaryotes [37-41]. Biochemical properties of RNA  
110 polymerase initiation lead to TSSs selectively occurring at a purine (R=A or G) just downstream  
111 from a pyrimidine (Y=C or T) – the  $Y_{-1}R_{+1}$  motif [42].  $Y_{-1}R_{+1}$  motifs may be additionally embedded  
112 in longer sequence motifs (the Inr element)[43, 44]. In yeast, the initiation factor TFIIB has been  
113 proposed to “read” TSS sequences to promote recognition of appropriate TSSs, with structural  
114 evidence supporting positioning of TFIIB to read DNA sequences upstream of a TSS [45, 46].

115 Yeast differs from other model eukaryotes in that TSSs for TATA-containing core promoters are  
116 generally dispersed, and are found ~40-120 nt downstream from the TATA [47]. Conversely,  
117 TSSs at TATA promoters in other organisms are tightly associated ~31 nt downstream of the  
118 TATA (with the first T in “TATA” being +1)[48]. As TATA promoters represent ~10% of  
119 promoters across well-studied organisms, they are the minority. Classic experiments using  
120 permanganate footprinting of melted DNA showed that promoter melting at two TATA promoters  
121 in yeast, *GAL1* and *GAL10*, occurs far upstream of TSSs, at a distance downstream from TATA,  
122 where melting would occur in other eukaryotes that have TSSs closer to the TATA element [49].  
123 This discovery led Giardina and Lis to propose that yeast Pol II scans downstream from TATA  
124 boxes to find TSSs. A large number of mutants have been found in yeast that perturb TSS  
125 selection, allowing the genetic architecture of Pol II initiation to be dissected, from those in Pol II  
126 subunit encoding genes *RPB1*, *RPB2*, *RPB7*, and *RPB9*, to GTF encoding genes *SUA7* (TFIIB),  
127 *TFG1* and *TFG2* (TFIIF), and *SSL2* (TFIIH), and the conserved transcription cofactor *SUB1* [50-  
128 70]. Mutants in GTFs or Pol II subunits have been consistently found at model promoters to alter  
129 TSS usage distributions in a polar fashion by shifting TSS distributions upstream or downstream  
130 relative to WT. These observations coupled with analysis of TSS mutations strongly support the  
131 directional scanning model for Pol II initiation (elegantly formulated in the work of Kuehner and  
132 Brow)[53].

133 Previous models for how initiation might be affected by Pol II mutants suggested that Pol II  
134 surfaces important for initiation functioned through interactions with GTFs within the PIC. We  
135 have previously found that altering residues deep in the Pol II active site, unlikely to be directly  
136 interacting with GTFs, but instead altering Pol II catalytic activity had strong, allele-specific  
137 effects on TSS selection for model promoters [71-73]. Observed effects were polar in nature,  
138 and consistent with the Pol II active site acting downstream of a scanning process but during  
139 TSS selection and not afterwards. In other words, Pol II catalytic efficiency appears to directly  
140 impact TSS selection. For example, it appeared that increased Pol II catalytic activity increased  
141 initiation probability, leading to an upstream shift in TSS usage at candidate promoters because  
142 less DNA needs to be scanned on average prior to initiation. Conversely, lowering Pol II  
143 catalytic activity results in downstream shifts to TSS usage at candidate promoters, because  
144 more promoter DNA has to be scanned prior to initiation. In general, candidate promoters  
145 examined for TSS selection have mostly been TATA containing (for example *ADH1*, *HIS4*), thus  
146 it is not known how universal Pol II initiation behavior or mechanisms are across all yeast core  
147 promoters, which likely comprise different classes with distinct architectures. To examine  
148 initiation by promoter scanning on a global scale in yeast, we perturbed Pol II or GTF activity  
149 genetically to examine changes to TSS usage across a comprehensive set of yeast promoters  
150 that likely represent all promoter classes in yeast. We have found that promoter scanning  
151 appears to be universal across yeast core promoters. Furthermore, we find that core promoter  
152 architecture correlates with sensitivity of core promoters to TSS perturbation in Pol II and  
153 initiation factor mutants. Our results have enabled formulation a model where Pol II and GTF  
154 function together in initiation to promote Pol II initiation efficiency at favorable DNA sequences.  
155 Finally, initiation by core promoter scanning makes predictions about the relationship between  
156 usable TSSs in a core promoter and the distribution of TSS usage. We compare yeast TSS  
157 distributions to a number of other eukaryotes and find that some, but not all, examined



158 eukaryotic model organisms have TSS distributions consistent with predictions of the “shooting  
159 gallery” scanning model.

## 160 161 RESULTS

### 162 Initiation mutants affect TSS selection globally in *Saccharomyces cerevisiae*

163 We previously found that yeast strains mutant for Pol II key active site residues important for  
164 normal catalysis showed polar effects on TSS selection at the model *ADH1* promoter in addition  
165 to some other promoters [72, 73]. *ADH1* is a TATA-containing promoter with major TSSs  
166 positioned at 90 and 100 nucleotides downstream of its TATA box. A number of mutants in Pol  
167 II and initiation factors also show TSS selection effects at *ADH1*. TSS selection effects have  
168 been hypothesized to relate to alterations in initiation sequence specificity, while the  
169 stereotypical polar effects of TSS-altering mutants are consistent with effects on scanning and  
170 not necessarily sequence specificity. These are not mutually exclusive models, and to  
171 understand better how Pol II activity and GTFs cooperate to identify TSSs, we mapped capped  
172 RNA 5' ends genome-wide in *S. cerevisiae* using TSS-seq for WT, a series of Pol II catalytic  
173 mutants, a TFIIB mutant (*sua7-58A5*)[71], and a TFIIF mutant (*tf2 $\Delta$ 146-180*)[74]. Positions of  
174 capped RNA 5' ends are taken to represent positions of TSSs as Pol II-initiated RNA 5' ends  
175 are capped shortly after emerging from the enzyme after initiation. We first determined how  
176 reproducible our pipeline (**Figure 1A**) was across the yeast genome, examining correlation of  
177 read positions corresponding to 5' ends across all genome positions containing at least three  
178 mapped reads in each library being compared (**Figure 1B, Supplemental Figures 1,2**).  
179 Examples of correlations between biological replicates are shown in **Figure 1B** for WT, one  
180 catalytically fast Pol II allele (*rpb1* E1103G)[75-77], and one catalytically slow Pol II allele (*rpb1*  
181 H1085Y)[73]. We refer to fast Pol II alleles as “gain of function” (GOF) alleles and slow Pol II  
182 alleles as “loss of function” (LOF) alleles [78]. Correlation plots for all other strains are shown in  
183 **Supplemental Figure 1**. Clustering analysis of Pearson correlation coefficients among libraries  
184 aggregated from biological replicates for each strain indicates that Pol II and initiation mutant  
185 classes can be distinguished based on RNA 5' end mapping alone (**Figure 1C**). **Supplemental**  
186 **Figure 2** shows clustering of Pearson correlation coefficients of individual biological replicates  
187 for reads in promoter regions.

188 We focused our analyses first on promoter windows predicted from the localization of PIC  
189 components by Rhee and Pugh [7] and anchored on TATA or “TATA-like” elements (core  
190 promoter elements or CPE underlying PIC assembly points) at the +1 position of the promoter  
191 window (**Figure 1D**). RNA 5' ends mapping to the top genome strand of these putative promoter  
192 windows indicates that these windows are associated with putative TSSs as expected. The  
193 majority of observed TSSs are downstream of predicted CPE/PIC locations from Rhee and  
194 Pugh, with TSSs originating from a range of distances from predicted CPE/PIC positions. We  
195 note that a fraction of promoter windows has TSSs arising from positions suggesting that the  
196 responsible PICs for those TSSs assemble at additional positions, either upstream or  
197 downstream.

198 Given the distinct and polar alterations of TSS distribution at model genes by Pol II GOF and  
199 LOF mutants, we asked if attributes of RNA 5' end distributions within promoter windows could  
200 also distinguish mutant classes. To do this, we examined two attributes of TSS usage: the  
201 change in position of the median TSS usage in the promoter window from WT (TSS “shift”), and  
202 the change in the width between positions encompassing 80% of the TSS usage distribution  
203 (from 10% to 90%, the change ( $\Delta$ ) in TSS “spread”, **Figure 1A**). Promoter regions were two-  
204 dimensionally hierarchically clustered for both attributes across all TSS libraries and TSS  
205 libraries were subsequently clustered for each attribute individually (left of **Figure 1E** shows

206 TSS shift and right shows  $\Delta$ TSS spread). First, we observed that profiles of shift in TSS position  
207 or alteration in TSS spread were sufficient to distinguish GOF *rpb1* mutants from LOF *rpb1*  
208 mutants. Second, Pol II and GTF mutants showed widespread directional shifting of TSSs  
209 across nearly all promoters. Pol II GOF and *tfg2 $\Delta$ 146-180* strains exhibited primarily upstream  
210 shifts in TSS distributions within promoter windows, while Pol II LOF and *sua7-58A5* exhibited  
211 primarily downstream shifts. Directional shifts are consistent with previously observed shifts at  
212 individual promoters, such as *ADH1*, suggesting that promoter scanning is operating across all  
213 yeast promoter classes.

214 We examined changes in TSS distribution relative to promoter class and Pol II mutant strength  
215 to determine how each relates to magnitude of TSS changes. To visualize changes, we  
216 separated promoters using classification by Taf1-enrichment or depletion as done previously.  
217 While recent work indicates that TFIID (containing Taf1) functions at all yeast promoters[30],  
218 differential recruitment of Taf1 correlates with promoter nucleosome organization, underlying  
219 DNA sequence composition, and DNA element enrichment (TATA *etc*) [7, 11, 23, 24, 27],  
220 suggesting this metric is a useful proxy for promoter class. **Figure 2A** shows example heat  
221 maps of the difference of normalized TSS distributions between WT and a Pol II GOF or a Pol II  
222 LOF mutant. The stereotypical patterns of polar changes to TSS distributions where distribution  
223 of TSSs shift upstream (increases upstream and decreases downstream, such as *rpb1* E1103G,  
224 or shift downstream (increases downstream and decreases upstream, such as *rpb1* H1085Y,  
225 are observed across essentially all promoters, and for all mutants examined including GTF  
226 mutants (**Supplemental Figure 3**). By determining the shift in median TSS position in promoter  
227 windows, we can see that mutants exhibit different strengths of effects on TSS distributions  
228 (**Figure 2B**). A double mutant between *tfg2 $\Delta$ 146-180* and *rpb1* E1103G shows enhancement of  
229 TSS defects across promoter classes (**Figure 2B, 2C**), similarly to what has been observed at  
230 for defects *ADH1* [71]. Examination of average TSS shift and measured in vitro elongation rate  
231 for Pol II mutants shows a correlation between the strength of in vivo TSS selection defect and  
232 in vitro Pol II elongation rate [72, 73] (**Figure 2D**). These results are consistent with TSS  
233 selection being directly sensitive to Pol II catalytic activity.

### 234 **Altered TSS motif usage in TSS-shifting mutants**

235 To understand the basis of directional TSS shifting in Pol II mutants, we asked how changes to  
236 TSS selection relate to potential sequence specificity of initiation (**Figure 3**). Earlier studies of  
237 TSS selection defects in yeast suggested that mutants might have altered sequence  
238 preferences in the PIC[32]. Our identified TSSs reflect what has been observed previously for  
239 Pol II initiation preferences, *i.e.* the simplest TSS motif is  $Y_{-1}R_{+1}$  as in most eukaryotes, with the  
240 previously observed budding yeast specific preference for  $A_{-8}$  at strongest TSSs [34](**Figure**  
241 **3A**). Preference for  $Y_{-1}R_{+1}$  is common across RNA polymerases and likely reflects the stacking  
242 of an initiating purine (R, A/G) triphosphate onto a purine at the -1 position on the template  
243 strand (reflected as pyrimidine (Y, C/T) on the transcribed strand)[42]. Within the most strongly  
244 expressed promoters, preference for  $A_{-8}$  is greatest for the primary TSS, and is reduced from  
245 secondarily to tertiarily preferred TSSs, even though these sites also support substantial  
246 amounts of initiation. Examination of the most focused, expressed promoters – promoters that  
247 contain the majority of their TSSs in a narrow window – reveals potential preferences at  
248 additional positions. We analyzed TSS usage within promoter windows by dividing all TSSs into  
249 64 motifs based on identities of the -8, -1, and +1 positions (**Figure 3B**). We asked if Pol II or  
250 GTF mutants altered apparent preferences among these 64 motifs. Based on aggregate usage  
251 of sequences across our promoter set, we found that the top 4 used motifs were  $A_{-8}Y_{-1}R_{+1}$ , with  
252 the next preferred motifs found among  $B_{-8}(\text{not } A)Y_{-1}R_{+1}$ . Pol II and GTF mutants have clear  
253 effects on motif usage distribution concerning the -8A position. Upstream TSS shifting mutants  
254 (Pol II GOF and *tfg2 $\Delta$ 146-180*) show a decreased preference for  $A_{-8}Y_{-1}R_{+1}$  motifs concomitant

255 with a gain in relative usage of  $B_{-8}Y_{-1}R_{+1}$  motifs, while downstream TSS shifting mutants (Pol II  
256 LOF and *sua7-58A5*) have the converse effect, though primarily increases in  $A_{-8}C_{-1}A_{+1}$  and  $A_{-8}C_{-1}G_{+1}$ . Total TSS usage might be affected by strong effects at a subset of highly expressed  
257 promoters, therefore we also examined motif preference on a promoter by promoter basis  
258 (**Supplemental Figure 4A,B**). *rpb1* E1103G TSS preferences illustrate that the reduction in  
259 preference for  $A_{-8}Y_{-1}R_{+1}$  motifs is observed across yeast promoters (**Supplemental Figure 4A**)  
260 while H1085Y shows the converse (**Supplemental Figure 4B**).  
261

262 Different models might explain why initiation mutants alter apparent TSS sequence selectivity,  
263 and in doing so lead to polar changes to TSS distribution or vice versa (**Figure 3C**). First,  
264 relaxation of a reliance on  $A_{-8}$  would allow, on average, earlier initiation in a scanning window  
265 because non- $A_{-8}$  sites would be more accessible to the PIC, whereas increased reliance on  $A_{-8}$   
266 would have the opposite effect. Alternatively, altered Pol II catalytic activity or GTF function may  
267 broadly affect initiation efficiency across all sites. In this case, for there to be an apparent  
268 change to TSS selectivity, there would need to be a corresponding polar distribution in TSS  
269 motifs within promoter regions. It has already been observed that yeast promoter classes  
270 sequence distributions deviate from random across promoters. Here, we examined sequence  
271 distributions for individual nucleotides and for select  $A_{-8}Y_{-1}R_{+1}$  motifs relative to median TSS  
272 position for yeast promoters (**Figure 3D, Supplemental Figure 4C**). As noted previously, yeast  
273 promoter classes differ based on their distributions of A/T [27, 79]. In Wu and Li, promoters  
274 were classified based on their nucleosome structure. Our classification based on Taf1-  
275 enrichment similarly divides yeast promoters with Taf1-depleted promoters highly enriched for T  
276 and depleted for A on the top DNA strand (**Supplemental Figure 4C**). Furthermore, the extent  
277 of depletion or enrichment correlates with promoter expression level in vivo, fitting with  
278 prediction based on reporter promoter analyses [80]. Enrichment or depletion of individual  
279 nucleotides would also be expected to potentially alter distributions of  $N_{-8}Y_{-1}R_{+1}$  TSS motifs.  
280 Therefore, we extended our analyses to  $N_{-8}Y_{-1}R_{+1}$  motifs (**Figure 3D**). We find that  $A_{-8}C_{-1}A_{+1}$ , the  
281 apparent preferred TSS motif for Pol II in yeast, is markedly enriched at median TSS and  
282 downstream positions with a sharp drop off upstream, with enrichment also showing correlation  
283 with apparent promoter expression level. A less preferred motif,  $T_{-8}T_{-1}A_{+1}$ , shows the opposite  
284 enrichment pattern (enriched upstream of median TSS, depleted downstream). This biased  
285 distribution in promoter sequence for TSS sequence motifs makes it difficult to determine  
286 whether apparent altered sequence specificity is a cause or consequence of altered TSS  
287 distributions.

## 288 TSS motif efficiency and usage altered across a number of TSS motifs

289 To examine further, we looked at TSS distributions by a method that allows us to determine if  
290 the average shapes of distributions are changed or merely shifted. We examined the efficiency  
291 of TSS usage by individual TSS motifs, with efficiency determined as the ratio of observed  
292 reads for a particular TSS to the sum of those reads and all downstream reads, as defined by  
293 Kuehner and Brow [53]. This calculation allows the probability of usage of TSSs to be compared  
294 within the framework of the polar scanning process. Scanning from upstream to downstream will  
295 create greater apparent usage for upstream TSSs relative to a downstream TSS, even if they  
296 are identical in initiation efficiency. If Pol II mutants primarily affect initiation efficiency across  
297 TSSs we have specific expectations for how efficiency will be affected. For example, if Pol II  
298 LOF alleles decrease efficiency across sequences we predict that median observed efficiency of  
299 TSS usage will be lower on average over all promoter positions relative to WT, except at the  
300 most downstream positions. This would reflect a spreading out of the usage distribution to  
301 downstream positions as more Pol II would continue to scan to downstream relative to WT.  
302 Conversely, if Pol II GOF alleles increase efficiency across sequences, we might expect the

303 median efficiency to increase for upstream promoter positions but return to baseline efficiency  
304 sooner than WT.

305 To partially account for innate sequence differences among TSS motifs, we examined TSS  
306 usage and efficiency across promoters for specific  $N_{-8}Y_{-1}R_{+1}$  motifs (**Figure 4**). Usage is defined  
307 as the reads found in particular TSS relative to the total reads for that promoter, whereas  
308 efficiency is an estimate of the strength of a TSS, assuming a polar scanning process. As an  
309 example, **Figure 4A** focuses on H1085Y and E1103G effects on TSSs containing the  $A_{-8}C_{-1}A_{+1}$   
310 motif. Median % usage (median % reads for  $A_{-8}C_{-1}A_{+1}$  motifs found at each promoter position for  
311 promoter class) shows that E1103G increases  $A_{-8}C_{-1}A_{+1}$  motif usage at upstream positions  
312 relative to WT usage for each promoter class, even though aggregate  $A_{-8}C_{-1}A_{+1}$  motif usage is  
313 lower for this mutant. Conversely, H1085Y decreases  $A_{-8}C_{-1}R_{+1}$  motif usage at almost all  
314 promoter positions except for the most downstream motifs for each promoter class. Examining  
315  $A_{-8}C_{-1}A_{+1}$  motif efficiency, which is another way to consider the distribution of reads, we find that  
316 E1103G essentially shifts the efficiency curve upstream relative to a WT strain, or to H1085Y,  
317 which shifts TSS usage distribution downstream, but appears to do so by reducing  $A_{-8}C_{-1}R_{+1}$   
318 motif efficiency at almost all promoter positions. This reflects a “flattening” of the usage  
319 distribution and would be expected from an overall reduction in initiation efficiency across TSS  
320 motifs. Extending this motif analysis to a range of  $N_{-8}Y_{-1}R_{+1}$  motifs used at different levels  
321 (**Figure 4B, 4C**) we observe that upstream shifting mutants shift usage upstream for all  
322 examined motifs (**Figure 4B**) while downstream shifting mutants have the opposite effects on  
323 motif usage. In contrast, when examining  $N_{-8}Y_{-1}R_{+1}$  motif efficiencies across promoter positions,  
324 downstream shifting mutants tend to reduce efficiencies across promoter positions while  
325 upstream shifting mutants shift TSS efficiencies upstream (**Figure 4C**). These analyses are  
326 consistent with upstream shifting mutants exhibiting increased efficiency across TSS motifs,  
327 which shifts both usage and observed efficiency curve to upstream positions, while downstream  
328 mutants reduce the efficiency curve and essentially flatten the usage distributions, as would be  
329 expected from reduced initiation efficiency across promoter positions.

### 330 **Non-TATA promoter sequence motifs do not appear to function like TATA-elements**

331 High-resolution TSS data allow us to evaluate promoter features relative to observed median  
332 TSS positions instead of using annotated TSS (one per gene and not necessarily accurate) from  
333 the Saccharomyces Genome Database. As has previously been determined, a minority of yeast  
334 promoters contain consensus TATA elements (TATAWAWR) and these are enriched in Taf1-  
335 depleted promoters (illustrated in **Figure 5A**) within ~50-100 basepairs upstream of TSS  
336 clusters but not in Taf1-enriched promoters. Furthermore, TATA enrichment tracks with  
337 apparent expression level determined by total RNA 5' reads within promoter windows. On the  
338 basis of finding TATA-like elements within ChIP-exo signal for GTFs along with a stereotypical  
339 pattern to the ChIP-exo signal, it has been proposed by Rhee and Pugh that promoters lacking  
340 consensus TATA elements can use TATA-like elements (TATAWAWR with one or two  
341 mismatches) for function analogous to a TATA element [7]. Evidence for the function of such  
342 TATA-like elements is sparse. In vitro experiments suggested that a TBP footprint is positioned  
343 over potential TATA-like element in *RPS5* promoter, but the element itself is not required for this  
344 footprint [81]. In contrast, more recent results have suggested modest requirement for TATA-like  
345 elements at three promoters (~2-fold) in an in vitro transcription system [82]. Examination of the  
346 prevalence of elements with two mismatches from TATA consensus TATAWAWR within  
347 relatively AT-rich yeast promoter regions suggests that there is a high probability of finding a  
348 TATA-like element for any promoter (**Figure 5A**). Taf1-enriched promoters show enrichment for  
349 an alternate sequence motif, a G-capped A tract (sequence GAAAAA), also called the GA-  
350 element (GAE) [27, 28]. This positioning of GAEs approximately 50-100 bp upstream of TSSs is  
351 reminiscent of TATA positioning (**Figure 5A**), and the GAE has been proposed to function as a



352 core promoter element at non-TATA promoters [28]. Other studies describe the relationship of  
353 this element to nucleosome positioning and suggest that these elements may function  
354 directionally in nucleosome remodeling at NDR promoters as asymmetrically distributed poly  
355 dA/dT elements [83, 84]. To understand how these potential elements function in gene  
356 expression, we cloned a number of candidate promoters upstream of a *HIS3* reporter and  
357 deleted or mutated identified TATA, TATA-like, or GAE elements and examined effects on  
358 expression by Northern blotting (**Figure 5B, Supplemental Figure 5**). As expected, in general,  
359 identified consensus TATAs positioned upstream of TSSs were important for normal expression  
360 of the *HIS3* reporter. In contrast, neither TATA-like or GAE elements in general had strong  
361 effects on expression, though some individual mutations affected expression to the same extent  
362 as mutation of TATA elements in the control promoter set. We conclude that GAE or TATA-like  
363 elements do not generally function similarly to consensus TATAs for promoter expression.

### 364 **TSS-shifting initiation mutants alter PIC-component positioning consistent with promoter** 365 **scanning model**

366 Given results above suggesting that TATA-like or GAE elements may not generally function as  
367 core promoter elements and therefore may lack value as potential PIC landmarks, we  
368 performed ChiP-exo for GTFs TFIIIB (*Sua7*) and TFIIH (*Ssl2*) to directly examine PIC  
369 component localization in WT, *rpb1* H1085Y, and *rpb1* E1103G cells. ChiP-exo [85] was  
370 performed in duplicate for all strains, examined for reads per promoter window correlation  
371 (**Supplemental Figure 6**) and reads from replicate libraries aggregated. We reasoned that  
372 ChiP-exo would allow us to determine where the PIC localizes for all promoter classes and,  
373 moreover, how PIC localization may be altered by Pol II mutants that alter TSS utilization.  
374 Previous work anchored ChiP-exo signal for PIC components over TATA or TATA-like  
375 sequences and identified a stereotypical overall pattern for crosslinks relative to these anchor  
376 positions, which were interpreted as relating to potential structure of the PIC open complex [7].  
377 Subsequent work has identified that crosslinking in ChiP-exo can have some sequence bias [86]  
378 and this sequence bias may reflect partially the stereotypical crosslinking patterns observed  
379 around TATA/TATA-like sequences. Because the PIC must access TSSs downstream from the  
380 site of assembly, it is likely that observed ChiP-exo signal reflects the occupancies of PIC  
381 components across promoters and not just the site(s) of assembly. Using TATA-like sequences  
382 as anchors, *Taf1*-enriched promoters were found to have PIC components on average closer to  
383 TSSs than they were for *Taf1*-depleted promoters [7]. Here, we used our high resolution TSS  
384 mapping data coupled with determination of median position of ChiP-exo signal for *Ssl2* or *Sua7*  
385 within promoter windows to examine distance between putative PIC position and initiation zone  
386 as reflected by observed median TSSs (**Figure 5C**). We confirm that on average, ChiP-exo  
387 signal for PIC components is closer to median TSS position for *Taf1*-enriched promoters versus  
388 *Taf1*-depleted promoters.

389 We reasoned that if ChiP-exo signal for PIC components at least partially reflects promoter  
390 scanning, *i.e.* the interaction of PIC components with downstream DNA between PIC assembly  
391 position and zone of initiation, then Pol II mutants that alter TSS usage distribution should also  
392 alter PIC component distribution across promoters. As illustrated in **Figure 5C**, ChiP-exo signal  
393 for *Sua7* (TFIIIB) appears furthest upstream on the top DNA strand while signal for *Ssl2* appears  
394 furthest downstream on the bottom DNA strand as expected for factors positioned at the  
395 upstream and downstream edges of the PIC. We observed modest changes to the aggregate  
396 distribution of ChiP-exo signal for both *Taf1*-enriched and *Taf1*-depleted promoter classes, with  
397 effects most obvious on the downstream edge of the PIC as detected by *Ssl2* signal on the  
398 bottom strand of promoter DNA (**Figure 5D**). In single molecule experiments examining putative  
399 promoter scrunching in the Pol II PIC, scrunching behavior was similar regardless of whether all  
400 NTPs (to allow initiation) were present [87]. This observation suggested the possibility that



401 putative promoter scanning driven by TFIID-mediated scrunching might be uncoupled to  
402 initiation, meaning that TFIID translocation might continue independently of whether Pol II had  
403 initiated or not. However, we observed altered PIC component localization in Pol II mutants  
404 predicted to directly alter initiation efficiency but not necessarily other aspects of PIC function  
405 such as scanning (directly). Thus, there may in fact be coupling of initiation and scanning in  
406 vivo. Apparent coupling has been observed in magnetic tweezers experiments where a short  
407 unwinding event that is strictly TFIID-dependent can be extended to a larger unwinding event by  
408 addition of NTPs, presumably reflecting Pol II transcription [88].

#### 409 **Relationships of TSS-selection altering initiation mutants with promoter architectural** 410 **features**

411 TSSs evolve at certain distances from the site of PIC assembly. This means that TSSs will be  
412 found at a range of distances from sites of initial assembly and will theoretically require  
413 scanning of different distances. We asked whether presumed scanning distance correlated with  
414 sensitivity to Pol II mutants for either TSS shifting or apparent promoter expression (**Figure 6**).  
415 We observed a modest correlation for TSS shifting extent based on where TSSs are relative to  
416 PIC location for Taf1-enriched promoters (**Figure 6A**), but a stronger correlation for Taf1-  
417 depleted promoters (**Figure 6B**) and the subset of Taf1-depleted promoters with consensus  
418 TATA boxes (**Figure 6C**). These latter promoters have putative PIC assembly points at greater  
419 distances from TSSs on average. Within the range of distances where most of these promoters  
420 have their TSSs, promoters with TSSs evolved at downstream positions show the greatest  
421 effects of upstream-shifting mutants on the TSS distribution (the TSS shift). Conversely,  
422 promoters with TSSs evolved at upstream positions show the greatest effects of downstream  
423 shifting mutants. These results are consistent with a facet of promoter architecture correlating  
424 with altered initiation activity but with potential upstream and downstream limiters on this  
425 sensitivity (see Discussion for more). We also asked if initiation mutants' effects on apparent  
426 expression, as measured by differential expression analysis for total TSS-seq reads within  
427 promoter windows could be related to promoter architecture. We used DEseq2 [89] to examine  
428 initiation mutant effects on putative expression relative to TSS-PIC distance (**Figure 6D, 6E**).  
429 That said, we observe divergent trends depending on class of initiation mutant, independent of  
430 promoter class, where Pol II LOF mutants exhibit a negative relationship on expression relative  
431 to WT as TSSs get closer to the position of the PIC while GOF initiation mutants (Pol II and *tfp2*)  
432 have the opposite trend (**Figure 6D, 6E**). Interestingly, *dua7-58A5* does not behave for gene  
433 expression similarly to Pol II LOF mutants, even though they are similar for other aspects of  
434 TSS defects. This correlation only explains a fraction of the changes in apparent RNA levels,  
435 but this is not unexpected. There are many reasons why gene expression will be altered in  
436 transcription factor mutants in addition to consequences directly from initiation defects  
437 (elongation or termination defects or secondarily from changes in cellular signaling and RNA  
438 stability). Our results suggest that either PIC-TSS distance or a correlated variable with  
439 promoter architecture may determine sensitivity of promoters to how initiation defects may  
440 contribute to gene expression defects. To examine if a strongly co-regulated gene class such as  
441 ribosomal protein genes might have an unequal distribution across TSS-PIC distances and thus  
442 drive some of the observed trend, we examined effects on gene expression for RP genes  
443 (**Supplemental Figure 8**). RP genes show the same trends as promoters overall for apparent  
444 expression vs. PIC-TSS distance even though they would be expected *a priori* to be co-  
445 regulated [90].

446 The majority of yeast promoters, especially the Taf1-enriched class, are found within a  
447 nucleosome depleted region (NDR) and flanked by an upstream -1 and a downstream +1  
448 nucleosome. Previous work showed association between ChiP-exo for GTFs and +1  
449 nucleosomes [7], and our data illustrate this as well (**Figure 7A**). We find that ChiP-exo for PIC

450 components track with nucleosome position with some flexibility. How the PIC recognizes these  
451 promoters in the absence of a TATA-box is an open question. Our results are consistent with  
452 the fact that TFIID has been found to interact with nucleosomes [91] and with the possibility that  
453 the +1 nucleosome may be instructive for, or responsive to, PIC positioning. Nucleosomes have  
454 previously been proposed as barriers to Pol II promoter scanning to explain the shorter distance  
455 between PIC-component ChIP-exo footprints and TSSs at Taf1-enriched promoters [7].  
456 Nucleosomes can be remodeled or be moved by transcription in yeast [8, 92], likely during  
457 initiation as even for promoters with NDRs, TSSs can be found within the footprints of the +1  
458 nucleosome. We do not observe a differential barrier for downstream shifting in Pol II or GTF  
459 mutants at Taf1-enriched promoters, which have positioned nucleosomes (**Figure 2B**), thus it  
460 remains unclear whether the +1 nucleosome can act as a barrier for Pol II scanning or TSS  
461 selection from the existing data.

462 To determine if altered initiation and PIC positioning of Pol II mutants, especially downstream  
463 shifting *rpb1* H1085Y, occurs in conjunction with altered +1 nucleosome positioning, we  
464 performed MNase-seq in *rpb1* H1085Y and E1103G mutants along with a WT control strain  
465 (**Figure 7B-I**). Determination of nucleosome positioning by MNase-seq can be sensitive to a  
466 number of variables (discussed in [93]), therefore we isolated mononucleosomal DNA from a  
467 range of digestion conditions and examined fragment length distributions in MNase-seq libraries  
468 from a number of replicates (**Supplemental Figure 9A**) to ensure we had matched digestion  
469 ranges for WT and mutant samples. We asked if +1 nucleosome midpoints were affected in  
470 aggregate, if array spacing over genes was altered, or if individual +1 nucleosomes shifted on  
471 average in Pol II mutants vs. WT. For H1085Y, we observed a slight but clear shift for the  
472 aggregate +1 position (**Figure 7B**). Aligning genes of Taf1-enriched promoters by the +1  
473 nucleosome position in WT suggests that H1085Y nucleosomes show increased spacing at the  
474 +3, +4, and +5 positions relative to WT (**Figure 7B**). The downstream shift in aggregate +1  
475 position also is reflected at the individual nucleosome level across H1085Y replicates (box plots,  
476 **Figure 7C**). To ask if this effect on nucleosomes reflected a global defect across genes or  
477 instead correlated with transcription (whether it be initiation or elongation), we performed the  
478 same analyses on the top (**Figure 7D,E**) and bottom expression decile Taf1-enriched promoters  
479 (**Figure 7F,G**). The downstream shift was apparent in top expression decile promoters but not in  
480 bottom expression decile promoters, as would be predicted if the alteration were coupled to  
481 transcription. For *rpb1* E1103G, we did not observe the same trend and effects were either  
482 reduced or not present among all replicates (**Figure 7H,I**). To potentially identify subpopulations  
483 of nucleosomes, we employed a more sophisticated analysis of nucleosomes using approach of  
484 Zhou *et al* [93] (**Supplemental Figure 9B**). This approach recapitulated a similarly slight effect  
485 of H1085Y on shifting the +1 nucleosome downstream across most H1085Y datasets relative to  
486 WT.

## 487 **Comparisons of TSS distributions and properties in eukaryotes**

488 Properties of TSS distributions have been examined in a number of species and linked to  
489 aspects of promoter architecture or expression behavior of underlying genes. Promoters are  
490 termed “broad” or “dispersed” when many TSSs are utilized and “narrow” or “focused” when  
491 TSSs are tightly clustered. The evolution of promoter sequence coupled with the mechanism of  
492 TSS selection will be expected to shape TSS distributions at promoters, with potential outcomes  
493 on promoter properties or transcript diversity. The broad preference for  $Y_{-1}R_{+1}$  initiator elements  
494 in eukaryotes is one defining factor for TSS selection. The presence and quality (consensus Inr  
495 [1, 44], for example) or absence of these sites will contribute to TSS distributions at promoters.  
496 The density of TSS usage will also be dependent on the mechanism of initiation. Promoter  
497 scanning, which has only been strongly posited as an initiation mechanism in *S. cerevisiae*,  
498 makes predictions about the density of observed TSSs relative to the density of potential  $Y_{-1}R_{+1}$

499 initiator elements. Scanning predicts that YpR dinucleotides within a scanning window will be  
500 “seen” as potential initiators and potentially used by a scanning PIC. Conversely, if TSSs are  
501 individually specified by distinct, non-scanning PICs, YpR dinucleotides unlinked to PIC  
502 assembly will not be used, therefore  $Y_{-1}R_{+1}$  usage relative to YpR dinucleotide density should be  
503 distinct for species utilizing different initiation mechanisms. To state differently, the density of  
504 TSS used to potential TSS motifs observed will be predictably different between a scanning  
505 mechanism a direct specification of an individual TSS or a small group of TSSs by an individual  
506 PIC. To determine if there were any commonalities between TSS distributions of *S. cerevisiae*  
507 and other eukaryotes, we compared them by a set of simple metrics (**Figure 8**).

508 First we examined the relationship between TSS spread and expression level in yeast (**Figure**  
509 **8A**). Recent analyses in mouse and human have indicated that highly expressed promoters  
510 have more focused TSS distributions [94], beyond association with TATA elements, which can  
511 be associated with a single TSS. This relationship was suggested previously in yeast from  
512 analysis of a subset of native yeast promoters [80]. We find a similar correlation for both yeast  
513 promoter classes (**Figure 8A**) as found in mouse and human. We next asked whether promoter  
514 TSS spread distributions were similar between *S. cerevisiae*, *S. pombe* [95], *D. melanogaster*  
515 [39, 96], *D. rerio* (Zebrafish)[97], or Human (K562 cells)[98] (**Figure 8B**). With the caveat that  
516 detection method (steady state RNA analysis methods like TSS-seq or CAGE vs. nascent  
517 methods such as PRO-cap) might bias distributions, we find similar distributions for 101 nt  
518 promoter windows in all species with *S. pombe* being an outlier, where promoters are on  
519 average much narrower. The difference in distributions between CAGE [39] and PRO-cap [96]  
520 datasets in *Drosophila* could reflect source of RNA, but more likely reflect enrichment for lowly  
521 expressed promoters and enhancers in the PRO-cap dataset relative to highly expressed,  
522 focused promoters in the CAGE dataset. Within analyzed promoters across species, we wished  
523 to determine the relationship between YpR dinucleotide density on the top promoter strand and  
524  $Y_{-1}R_{+1}$  TSS usage (**Figure 8C-E**). We examined each dataset for fraction of TSSs that were  $Y_{-1}R_{+1}$   
525 on a promoter by promoter basis as well as fraction of sequencing reads that were  $Y_{-1}R_{+1}$   
526 (**Supplemental Figure 10A**). While our dataset showed the strongest  $Y_{-1}R_{+1}$  preference,  
527 median  $Y_{-1}R_{+1}$  site fraction was ~50% while median  $Y_{-1}R_{+1}$  sequencing read fraction was  $\geq 75\%$   
528 across species. We find that YpR dinucleotide density relative to promoter spread is similar  
529 across species (**Figure 8C**). The TSS usage relative to this density did differ among species  
530 indicating differences in TSS distributions within spreads (**Figure 8D**). For this analysis, we  
531 considered a  $Y_{-1}R_{+1}$  site “used” if its usage was  $\geq 2\%$  of reads for that promoter. Zebrafish  
532 zygotic promoters were at least superficially similar to *S. cerevisiae* while Zebrafish maternal  
533 promoters and other species showed a lower rate of  $Y_{-1}R_{+1}$  usage relative to YpR density. This  
534 is especially interesting because Zebrafish maternal and zygotic promoters can be closely  
535 positioned in the genome but maternal promoters are distinguishable by WW motif enrichment  
536 ~30 nt upstream of individual TSSs [97]. This positioning for individual TSSs is reminiscent of  
537 TATA-box positioning to TSSs in metazoans [1] and is consistent with individual TSS  
538 specification for maternal promoters. In contrast, Zebrafish zygotic promoters lack these WW  
539 elements. Promoters in a number of metazoans, especially mammals, can be CpG rich. While  
540 CpG is a YpR dinucleotide, it does not appear to be preferred – for most species the fraction of  
541 reads deriving from  $C_{-1}G_{+1}$  sites was lower than fraction of TSSs deriving from CpGs  
542 (**Supplemental Figure 10B**). Therefore, we examined fraction non-CpG site used/present  
543 relative to promoter spread (**Figure 8E**). In this analysis, *S. cerevisiae*, human, and Zebrafish  
544 zygotic promoters were distinguished from *Drosophila*, *S. pombe*, and Zebrafish maternal  
545 promoters. These analyses suggest that TSS distributions in some eukaryotes beyond *S.*  
546 *cerevisiae* share attributes consistent with being derived from a scanning mechanism.

547  
548 **DISCUSSION**

549 Budding yeast has been a powerful model for understanding key mechanisms for transcription  
550 by Pol II. An early identified difference in promoter behavior for yeast TATA-containing  
551 promoters from classically studied TATA-containing human viral promoters such as adenovirus  
552 major late led to proposals that initiation mechanisms were fundamentally different between  
553 these species [47, 99]. TSSs for yeast TATA promoters were found downstream and spread  
554 among multiple positions while TSSs for viral and cellular TATA promoters were found to be  
555 tightly positioned ~31 nt downstream of the beginning of the element [48]. This positioning for  
556 TSSs at TATA promoters holds for many species including *S. pombe* [95] but not budding yeast.  
557 This being said, genome-wide studies of initiation indicate that the vast majority of promoters  
558 use multiple TSSs, though evolution appears to restrict TSS usage at highly expressed  
559 promoters in multiple species, including budding yeast (our work, [79, 94]. How these TSSs are  
560 generated and if by conserved or disparate mechanisms is a critical unanswered question in  
561 gene expression.

562 We have shown here that Pol II catalytic activity, as determined by mutations deep in the active  
563 in the essential “trigger loop”, confer widespread changes in TSS distributions across the  
564 genome regardless of promoter type. Mutants in core Pol II GTFs TFIIB (*sua7* mutant) or TFIIF  
565 (*tfg2* mutant) confer defects of similar character to downstream shifting or upstream shifting Pol  
566 II alleles, respectively. The changes observed are consistent with a model wherein TSSs are  
567 displayed to the Pol II active site directionally from upstream to downstream, with the probability  
568 of initiation controlled by the display or scanning rate, and by Pol II catalytic rate. This system is  
569 analogous to a “shooting gallery” where targets (TSSs) move relative to a fixed firing position  
570 (the Pol II active site)[100]. In this model, Pol II catalytic activity, the rate of target movement,  
571 *i.e.* scanning rate, and the length of DNA that can be scanned *i.e.* scanning processivity, should  
572 all contribute to initiation probability at any particular sequence. Biochemical potential of any  
573 individual sequence will additionally contribute to initiation efficiency. Our results suggest that  
574 Pol II and tested GTF mutants affect initiation efficiency across sequence motifs and that  
575 differential effects in apparent motif usage genome-wide likely result from skewed distributions  
576 of bases within yeast promoters. Our *in vivo* results are consistent with elegant *in vitro*  
577 transcription experiments showing reduction of ATP levels (substrate for initiating base or for  
578 bases called for in very early elongation) confers downstream shifts in start site usage [101].  
579 Reduction in substrate levels *in vitro*, therefore, is mimicked by reduction of catalytic activity *in*  
580 *vivo*.

581 How template sequence contributes to initiation beyond positions close to the template  
582 pyrimidine specifying the initial purine, and how they interact with scanning, is an open question.  
583 For models employing a scanning mechanism such as the “shooting gallery”, it can be imagined  
584 that bases adjacent to the TSS affect TSS positioning to allow successful interaction with the  
585 first two NTPs, while distal bases such as the -8T on the template strand (-8A on the non-  
586 template strand) stabilize or are caught by interaction with the yeast TFIIB “reader” to hold TSSs  
587 in the active site longer during scanning [45]. Critical to this model are the structural studies just  
588 cited of Sainsbury *et al* on an artificial initial transcribing complex showing direct interaction of  
589 Sua7 D69 and R64 and -8T and -7T on the template strand. There are a number of ways TFIIB  
590 may alter initiation efficiency beyond recognition of upstream DNA. TFIIB has also been  
591 proposed by Sainsbury *et al* to allosterically affect Pol II active site Mg<sup>2+</sup> binding and RNA-DNA  
592 hybrid positioning [45, 46]. Direct analysis of Kuehner and Brow [53] found evidence for lack of  
593 effect of *sua7* R64A on efficiency of one non--8A site, while -8A sites were affected, consistent  
594 with this residue functioning as proposed. We isolated individual motifs to examine efficiency  
595 (**Figure 4C**), and our tested *sua7-58A5* allele reduced efficiencies of both -8A and non--8A  
596 motifs alike. This allele contains a five-alanine insertion at position 58 in Sua7, likely reducing  
597 efficiency of the B-reader but possibly leaving some R64 interactions intact. Specific tests of  
598 Sua7 R64 mutants under controlled promoter conditions will directly address whether this



599 contact confers TSS selectivity. Additionally, altered selectivity alleles of Sua7 would be  
600 predicted if interactions with the template strand were altered.

601 Core transcriptional machinery for Pol II initiation is highly conserved in eukaryotes leading to  
602 the general expectation that key mechanisms for initiation will be conserved. While it has long  
603 been believed that budding yeast represents a special case for initiation, this has not  
604 systematically been addressed in eukaryotes. The question of how broadly conserved are  
605 initiation mechanisms in eukaryotic gene expression is open for a number of reasons. There are  
606 examples of diverse transcription mechanisms within organisms across development, for  
607 example tissues, cells, or gene sets using TBP-related factors to replace TBP in initiation roles.  
608 For example, in zebrafish, distinct core promoter “codes” have been described for genes that  
609 are transcribed in oocytes (maternal transcription) versus those transcribed during zygotic  
610 development (zygotic transcription) [97]. The maternal code is proposed to utilize an alternate  
611 TBP for initiation, while zygotic promoters utilize TBP. Distinct core promoters are used to drive  
612 maternal and zygotic expression. For genes transcribed both maternally and zygotically, distinct  
613 TSS clusters specific to each phase of development can be quite close to one another in the  
614 genome and may have superficially similar distribution characteristics, for example promoter  
615 widths or spreads. However, individual maternal TSSs are each stereotypically positioned  
616 relative to an upstream sequence motif, while individual zygotic TSSs are not. This difference  
617 can be detected in the densities of TSSs used in a cluster. Our analysis indicates that  
618 differential density between maternal and zygotic does not relate to differential YpR dinucleotide  
619 density, and that zygotic TSS usage density in zebrafish appears similar to TSS usage density  
620 in budding yeast, while maternal TSS usage density is distinct. The conservation of scanning  
621 between organisms or for subsets of promoter classes within other eukaryotes is an open  
622 question.

623 Another major question is how promoters without TATA-elements are specified. Organization of  
624 PIC components is relatively stereotypical within a number of species, as detected by ChIP  
625 methods for Pol II and GTFs [7, 102, 103], with the caveat that these are population-based  
626 approaches. The most common organization for promoters across examined eukaryotes is a  
627 NDR flanked by positioned nucleosomes. Such NDRs can support transcription bidirectionally,  
628 reflecting a pair of core promoters with TSSs proximal to the flanking nucleosomes [13, 14, 17-  
629 19, 104-106]. While sequence elements have been sought for these promoters, an alternate  
630 attractive possibility is that NDR promoters use nucleosome positioning to instruct PIC  
631 assembly. The association of TSSs with the edges of nucleosomes is striking across species,  
632 though in species with high levels of promoter proximal pausing, nucleosomes may be  
633 positioned downstream of the pause. Transcription itself has been linked to promoter  
634 nucleosome positioning, turnover, or exchange in yeast. Given that MNase analyses reflects  
635 bulk nucleosome populations, and depending on kinetics of initiation and the duration of  
636 chromatin states supporting initiation (expected to be relatively infrequent), the nature of  
637 initiating chromatin is unclear.

638 Finally, how does initiation interact with nucleosomes? In a scanning model, Pol II activity will  
639 not be expected to control the interactions with the downstream nucleosome. Instead, TFIIH  
640 bound to downstream DNA and translocating further downstream to power scanning, will be  
641 expected to be the major interaction point of the PIC and the +1 nucleosome. This model  
642 explains why downstream nucleosomes may not limit changes to scanning incurred by  
643 alterations to Pol II activity, because Pol II will be acting downstream of the TFIIH-nucleosome  
644 interaction. DNA translocation by TFIIH is expected to be competitive with the +1 nucleosome  
645 for DNA as scanning proceeds into the territory of the nucleosome. Indeed, transcription and  
646 TFIIH activity are proposed to drive H2A.Z exchange in the +1 nucleosome [92]. How TFIIH  
647 activity is controlled to either allow scanning in addition to promoter opening or be restricted to



648 promoter opening is a major question in eukaryotic initiation. The *S. cerevisiae* CDK module of  
649 TFIIH has been implicated in restricting initiation close to the core promoter in vitro, but no in  
650 vivo evidence has emerged in vivo for this mechanism [107]. TFIIH components have long been  
651 implicated in controlling activities of the two ATPases – Ssl2 and Rad3 in yeast, XPB and XPD  
652 in humans – to enable or promote transcription or nucleotide excision repair [108-110]. These  
653 inputs may regulate activity of ATPases and their ability to be coupled to translocation activity  
654 analogous to paradigms for DNA translocase control in chromatin remodeling complexes [111].

655

## 656 **METHODS**

657

### 658 **Yeast strains, plasmids, and oligonucleotides**

659 Yeast strains used in this study were constructed as described previously [71-73]. Briefly,  
660 plasmids containing *rpo21/rpb1* mutants were introduced by transformation into a yeast strain  
661 containing a chromosomal deletion of *rpo21/rpb1* but with a wild type *RPO21/RPB1 URA3*  
662 plasmid. GTF mutant parental strains used for GTF single or GTF/Pol II double mutant analyses  
663 were constructed by chromosomal integration of GTF mutants into their respective native locus  
664 by way of two-step integrations [71]. Strains used in ChiP-exo were TAP-tagged at target genes  
665 (*SSL2*, *SUA7*) using homologous recombination of TAP tag amplicons (Puig et al., 2001)  
666 obtained from the yeast TAP-tag collection [112] (Open Biosystems) and transferred into our lab  
667 strain background [113]. All strains with mutations at chromosomal loci were verified by  
668 selectable marker, PCR genotyping, and sequencing. *rpo21/rpb1* mutants were introduced to  
669 parental strains with or without chromosomal locus mutation by plasmid shuffling [114],  
670 selecting for cells containing *rpo21/rpb1* mutant plasmids (*Leu*<sup>+</sup>) in absence of the *RPB1* WT  
671 plasmid (*Ura*<sup>-</sup>), thus generating single *rpo21/rpb1* mutation strain or double mutant strains  
672 combining mutations in GTF and *rpo21/rpb1* alleles. Yeast strains in all experiments were grown  
673 on YPD (1% yeast extract, 2% peptone, 2% dextrose) medium unless otherwise noted. Mutant  
674 plasmids for yeast promoter analyses were constructed by Quikchange mutagenesis  
675 (Stratagene) following adaptation for use of Phusion DNA polymerase (NEB) [115]. All  
676 oligonucleotides were obtained from IDT. Yeast strains, plasmids, and oligonucleotide  
677 sequences are described in **Additional File 1**.

678

### 679 **Sample preparation for 5'-RNA sequencing**

680 Yeast strains were diluted from a saturated overnight YPD culture and grown to mid-log phase  
681 (~1.5x10<sup>7</sup>/ml) in YPD and harvested. Total RNA was extracted by a hot phenol-chloroform  
682 method [116], followed by on-column incubation with DNase I to remove DNA (RNeasy Mini kit,  
683 Qiagen), and processing with a RiboZero rRNA removal kit (Epicentre/Illumina) to deplete  
684 rRNA. To construct the cDNA library, samples were treated with Terminator 5' phosphate-  
685 dependent exonuclease (Epicentre) to remove RNAs with 5' monophosphate (5' P) ends, and  
686 remaining RNAs were purified using acid phenol/chloroform pH 4.5 (Ambion) and precipitated.  
687 Tobacco acid pyrophosphatase (TAP, Epicentre) was added to convert 5' PPP or capped RNAs  
688 to 5' P RNAs. RNAs were purified using acid phenol/chloroform and a SOLiD 5' adaptor was  
689 ligated to RNAs with 5' P (this step excludes 5' OH RNAs), followed by gel size selection of 5'  
690 adaptor ligated RNAs and reverse transcription (SuperScript III RT, Invitrogen) with 3' random  
691 priming. RNase H (Ambion) was added to remove the RNA strand of DNA-RNA duplexes,  
692 cDNA was size selected for 90-500 nt lengths. For SOLiD sequencing, these cDNA libraries  
693 were amplified using SOLiD total RNA-seq kit (Applied Biosystems) and SOLiD Barcoding kit  
694 (Applied Biosystems), final DNA was gel size selected for 160-300 nt length, and sequenced by  
695 SOLiD (Applied Biosystems) as described previously [117, 118].

696

### 697 **5'-RNA sequencing data analyses**

698 SOLiD TSS raw data for libraries 446-465 was based on 35 nt short reads. The data were  
699 delivered in XSQ format and subsequently converted into Color Space csfasta format. Raw data  
700 for libraries VV497-520 was in FASTQ format. Multiple read files from each library were  
701 concatenated and aligned to *S. cerevisiae* R64-1-1 (SacCer3) reference genome from  
702 Saccharomyces Genome Database. We explored the possibility that alignments might be  
703 affected by miscalling of 5' end base of the SOLiD reads. We trimmed one base at the 5' end of  
704 the reads of the TSS libraries VV497-520, and aligned the trimmed reads independently from  
705 the raw reads for direct comparison. The alignment rates did not differ significantly, indicating 5'  
706 end of our SOLiD libraries reads were not enriched for sequencing errors more than the rest of  
707 the reads. In addition, we asked if the alignment was affected by 5' micro-exons in some *S.*  
708 *cerevisiae* genes by using TopHat to allow for potential splicing in alignment [119]. As we did  
709 not observe such splicing, we proceeded with Bowtie [120] allowing 2 mismatches but only  
710 retained uniquely mapped alignments. The aligned BAM files were converted to bedgraphs, and  
711 5' base (start tag) in each aligned read was extracted using Bedtools (v2.25.0) for downstream  
712 analyses [121]. Mapping statistics for TSS-seq, MNase-seq, and ChIP-exo libraries are  
713 described in **Additional File 2**.

714  
715 To assess the correlation between biological replicates and different mutants, base-by-base  
716 coverage correlation between libraries was calculated for all bases genome-wide and for bases  
717 up and downstream of the promoter windows identified by [7](408 nt total width, described  
718 below). Given that Pearson correlation is sensitive to variability at lower coverage levels,  
719 correlations for positions above arbitrarily chosen thresholds (3 reads or 10 reads per position)  
720 were calculated and 3 read threshold correlations are shown. Heat scatter plots were generated  
721 the LSD R package (4.0-0) (cite Schwalb, Bjoern, Achim Tresch, and Romain Francois. "LSD Lots of  
722 Superior Depictions." *The Comprehensive R Archive Network* (2011)) and compiled in Adobe  
723 Photoshop. Heatmaps were generated using Morpheus  
724 (<https://software.broadinstitute.org/morpheus/>) or JavaTreeView [122] and Cluster [123].

725  
726 To create base-by-base coverage in selected windows of interest, computeMatrix reference-  
727 point() function from the deepTools package (2.1.0) was used [124]. There were two types of  
728 windows of interest. First, the promoter windows were established by expanding 200 nt up and  
729 downstream from the TATA/TATA-like elements identified by [7] (here we term them  
730 TATA/TATA-like centered windows) (408 nt total width). Most of these windows (5945/6044)  
731 were centered on TATA/TATA-like element annotated in [7], while 99 promoters did not have  
732 annotated TATA/TATA-like element and were centered on the TFIIB ChIP-exo peak. Second,  
733 we established windows centered on transcription start sites (TSSs) to investigate TSSs at  
734 promoters in a core promoter element-independent manner (here we term them TSS-anchored  
735 windows). For the TSS anchored windows, we first determined the 50th percentile (median)  
736 TSS (see next paragraph for details) in the TATA/TATA-like centered promoter windows with  
737 WT TSS reads derived from *RPB1* WT libraries 446, 456, 497, and 499 (see below) and  
738 expanded 200 nt upstream and 200 nt downstream from this "median" TSS position (401 nt total  
739 width), adjusting this window one time based on new TSSs potentially present after shifting the  
740 window, and then displaying 250 nt upstream and 150 nt downstream from the median TSS  
741 position.

742  
743 Several characteristics of TSS utilization were calculated as following: (1) The position of the  
744 TSS containing the 50th percentile of reads in the window and was termed the "median" TSS.  
745 (2) Distance between 10th percentile and 90th percentile TSS position in each promoter was  
746 used to measure the width of the TSS distribution, termed the "TSS Spread". Specifically, TSS  
747 positions with 10th and 90th percentile reads were determined in a directional fashion (from  
748 upstream to downstream), the absolute value of the difference between two positions by

749 subtraction was calculated as “TSS Spread”. (3) Total reads in windows of interest were  
750 summed as a measurement of apparent expression. (4) Normalized densities in windows were  
751 calculated as fraction of reads at each TSS position relative to the total number of reads in the  
752 window. The normalized densities were subsequently used for examination of TSS usage  
753 distribution at each promoter independent of expression level, comparison among different  
754 libraries, and start site usage pattern changes in mutants, and visualization. (5) Differential  
755 expression analyses of promoter expression determined from (3) were computed by DESeq2  
756 [89]. The log<sub>2</sub> fold changes (log<sub>2</sub>FC) of the expression between mutant and wild type were  
757 taken from the output of DESeq2 analysis and used to examine the dependency on TSS  
758 distance to PIC. Lowly expressed promoters with fewer than 100 reads from the sum of four WT  
759 replicates were filtered out given their high coefficient of variations. We observed that replicates  
760 of each strain (WT or mutant) were highly correlated at the base coverage level as well as  
761 primary characteristics of TSS usage (distance to core promoter element, apparent expression).  
762 We therefore aggregated the counts from replicate strains for downstream analyses (*i.e.*,  
763 aligned reads for all replicates of each strain were combined and treated as single “merged  
764 library”). Mutant vs WT relative changes of median TSS (**Figure 1E**), TSS spread and  
765 normalized TSS densities (**Figure 2**) in the indicated windows are calculated in R and visualized  
766 in Morpheus or Graphpad Prism 8.

767  
768 In the TSS motif analyses, two major characteristics were computed. First was TSS usage  
769 defined by the number of reads at each TSS divided by the total number of reads in the  
770 promoter window. Second, we calculated TSS efficiency by dividing TSS reads at an individual  
771 position by the reads at or downstream of the TSS, as a proxy to estimate how well each TSS  
772 gets utilized with regard to the available Pol II (TSS efficiency)[53]. TSS positions with ≥20%  
773 efficiency calculated with ≤ 5 reads were excluded (which definitionally are only found at the  
774 downstream edges of windows). The corresponding -8, -1, +1 position underlying each TSS  
775 (N<sub>-8</sub>N<sub>-1</sub>N<sub>+1</sub> motif) was extracted by Bedtools getfasta (v2.25.0). Start site motif compilation was  
776 done by WebLogo for indicated groups of TSSs. Reads for each N<sub>-8</sub>N<sub>-1</sub>N<sub>+1</sub> motif of interest were  
777 summed, and fraction of the corresponding motif usage in total TSS reads was calculated for  
778 each library. Differences of fraction of start site motif usage in WT and mutants were calculated  
779 by subtracting the WT usage fraction from that in each mutant.

## 780 781 **ChiP-exo sequencing**

782 ChiP-exo experiments were performed as described previously[85, 125]. Briefly, yeast strains  
783 were amplified to mid-log phase (~1.5X10<sup>7</sup>/ml) in rich medium (YPD) from a saturated overnight  
784 culture, crosslinked with formaldehyde (1% final concentration from 37% formaldehyde solution,  
785 (Mallinckrodt)) for 20 min and then quenched by 0.25M glycine (from 2.5M stock, pH 7). Cells  
786 were washed, lysed with glass beads by beat beating (30s on 60s off, 7-8 rounds), visually  
787 inspected under microscope, followed by shearing of chromatin to ~200-500 nt fragments by  
788 sonication at 4 °C (Diagenode Bioruptor, 30s on 30s off, high power, 18 cycles or until desired  
789 size reached) in FA-lysis buffer without detergents. Solubilized chromatin was  
790 immunoprecipitated using IgG-bound sepharose resin and washed. Immunoprecipitated  
791 chromatin on resin was end polished by T4 DNA polymerase (NEB). Adaptor sequences were  
792 subsequently ligated on both ends of linker DNA, followed by nick repair using phi29  
793 polymerase (NEB). λ exonuclease (NEB) was used for 5' → 3' digestion of sonicated protein-  
794 dsDNA and RecJ exonuclease for 5' → 3' digestion of ssDNA to minimize background. Resin  
795 was washed, DNA was eluted with TEV protease (Invitrogen), and crosslinks reversed by  
796 incubation at 65 °C with Proteinase K (Roche). DNA was extracted by  
797 phenol:chloroform:isoamyl alcohol (each overhang of dsDNA was different and corresponded to  
798 one border of protein binding), denatured to ssDNA, amplified to dsDNA with oligos with -OH on  
799 both ends to amplify exonuclease treated strand only. Adaptors were ligated only to λ

800 exonuclease digested ends of dsDNA, ligated DNA was then amplified, size selected for  
801 120–160 nt and were sequenced by SOLiD sequencing (Applied Biosystems)

802  
803 First replicate of ChiP-exo reads were aligned to V56 reference genome by Corona Lite  
804 software provided by SOLiD allowing up to 3 mismatches. Only uniquely aligned reads were  
805 kept. ChiP-exo reads alignments were converted to SacCer3 (V64) genome alignment using the  
806 LiftOver tool (<http://genome.ucsc.edu/>) for downstream analyses. Second replicate of ChiP-exo  
807 reads were aligned to V64 genome. 5' base of each aligned reads were extracted to a tabular  
808 coverage file in a strand conscious way, and then converted to bed format. We separated the  
809 ChiP-exo reads on two strands relative to the promoters in study: TOP strand (reads on the  
810 same strand the direction of promoter transcription, thus TOP may map to either Watson  
811 (forward) strand or Crick (reverse) strand on genome) and BOTTOM strand (opposite strand of  
812 TOP strand). Replicates of ChiP-exo reads for each strain were compared by base-by-base  
813 (after 10-read thresholding) correlation. Characteristics of ChiP-exo reads distribution (median  
814 position, levels) in promoter windows were also compared, and we concluded that replicates  
815 showed reasonable correlations, considering variability in ChiP-exo reads base-by-base  
816 between replicates. Therefore, we merged aligned reads from replicates as a single library for  
817 downstream analyses. For each promoter, ChiP-exo 5' tags were assigned to TOP or BOTTOM  
818 strand at each promoter window and analyzed separately. Base-by-base read density in  
819 selected windows of interest was computed by computeMatrix reference-point() function from  
820 deepTools package (2.1.0)[124], similar to our TSS analyses above. The read density at each  
821 position was subsequently normalized to total reads in the window (we termed normalized  
822 density). ChiP-exo “median” position and total reads in each window were calculated similarly  
823 with those of TSS reads, as described above. Median ChiP-exo position was used as a proxy  
824 for core promoter element position in Taf1-enriched promoter classes where no proven  
825 functional promoter motif has been identified and tested.

### 826 827 **Nucleosome MNase sequencing**

828 Nucleosomal DNAs were prepared by a method described elsewhere [126] with the following  
829 modifications. Yeast strains were grown in rich medium (YPD) to mid-log phase ( $\sim 1.5 \times 10^7$ /ml)  
830 and cross-linked with methanol-free formaldehyde (1% final concentration, Polysciences Inc) for  
831 30 min and quenched with 0.25M final concentration of glycine (from 2.5M stock, pH 7). Cells  
832 were washed and digested with zymolyase-20T (Sunrise International) (6mg for 500ml culture)  
833 for  $\sim 17$  min or until  $\sim 90\%$  cells appeared as spheroplasts, followed by MNase (Thermo Fisher  
834 Scientific) digestion with different amount of MNase to generate “less” and “more” digested  
835 nucleosomes (in general, digests were limited such that at least mono, di, and trinucleosomes  
836 were still apparent after agarose gel electrophoresis). Crosslinks on nucleosomes were  
837 reversed at 65 °C in the presence of Proteinase K (G-Biosciences) overnight. DNA was  
838 extracted by phenol/chloroform, and digested with RNase A (Thermo Fisher Scientific) to  
839 remove RNAs. Nucleosomal DNA was separated on 1.5% agarose gels containing SYBR gold  
840 dye (Thermo Fisher Scientific) and mono-nucleosome bands were identified and selected under  
841 blue light and gel purified (Omega Biotek). Mononucleosomal DNA fragments were sequenced  
842 on an Illumina HiSeq 2500 instrument (2x125 paired-end sequencing). Paired-end nucleosome  
843 reads were aligned to V64 (SacCer3) reference genome using Bowtie2 [127] allowing 1  
844 mismatch, with only uniquely mapped alignments are kept. We used Samtools [128] to extract  
845 the alignments to build genome coverage for visualization and start and end position of  
846 sequenced DNA fragments. Using the start and end positions of each fragments, fragment  
847 length and midpoint position of each fragment were calculated.

848  
849 Midpoints were analyzed in two main windows of interest. First was median TSS centered  
850 window ( $-250$  upstream and  $+150$  downstream based on median TSS position as above).



851 Second, windows were identified based on determined WT +1 nucleosome peak position, as  
852 described below using custom scripts (NucSeq v1.0)[129]. Midpoints were assigned to relative  
853 coordinates of the window and smoothed using a triweight kernel (75 nt up/downstream total  
854 width with a uniform kernel with 5 nt up/downstream width) to get a “smoothed” midpoints  
855 profile. The nucleosome peak was called by identifying the local maximum using the smoothed  
856 profile. This method enabled us to call a single peak position in ranges of 150 nt windows using  
857 the smoothed nucleosome midpoints profiles, thus determining one peak per nucleosome.  
858 Average chromosomal coverage (sum of raw midpoints divided by current chromosome length)  
859 was calculated for each chromosome as a read threshold per position. The first peak  
860 downstream of the median TSS position that had larger than or equal to 20% of chromosomal  
861 average coverage and was also within a reasonable position range for a +1 nucleosome was  
862 annotated as the +1 nucleosome peak at each promoter (if present). +1 nucleosome peaks  
863 were separately identified in 4 WT libraries (replicates for “less” and “more” digested chromatin),  
864 The replicates for “less” digested WT +1 nucleosome peaks showed greater correlation.  
865 Therefore, we took the average of +1 nucleosome peaks between two “less” digested WT  
866 libraries and used as the center for +1 nucleosome-based window. 500 nt up/downstream of  
867 these base positions led to 5660 +1 nucleosome centered 1001 nt wide windows, allowing  
868 observation of up to 8 nucleosomes surrounding +1 nucleosomes. Nucleosome midpoints were  
869 subsequently assigned to this window using the same method as above. Aggregated  
870 nucleosome midpoints analysis was done by sorting the promoters by promoter class,  
871 expression level (TSS reads in window) followed by summing the nucleosome midpoint counts  
872 at each position in the window.

873

#### 874 **Analysis of TSS usage in different species**

875 Genome-wide TSS sequencing datasets analyzed for different eukaryotes were: CAGE  
876 sequencing in *Drosophila* by the Celniker lab [39], PROcap sequencing in *Drosophila* by Lis lab  
877 [96]; GROcap sequencing in human by the Lis lab [98]; CAGE sequencing in zebrafish by the  
878 Lenhard lab [97]; and DeepCAGE sequencing in *S. pombe* by the Shao lab [95]. Aligned start  
879 site reads data were retrieved from read archives or authors in various formats (tab, bigwig, wig  
880 *etc.*). Replicate libraries were merged and treated as one library after determining they were  
881 well-correlated with each other. Start site tags files were formatted to Bed6 format (UCSC) and  
882 major start sites determined by authors were used to create 101 nt TSS centered windows for  
883 each promoter in a strand conscious manner. When a major TSS cluster was identified instead  
884 of single start site at each promoter by the authors’ respective analyses, the midpoint of the TSS  
885 cluster was used as the center of the window. Start site tags were then mapped into TSS-  
886 centered promoter windows using a custom R script. Separate files containing underlying  
887 sequence in the same window of each promoter from appropriate reference genome were  
888 created for each library.

889

890 Because  $Y_{-1}R_{+1}$  start site motifs are strongly preferred by Pol II, we specifically analyzed each  
891 YR motif separately and in aggregate.  $Y_{-1}R_{+1}$  usage and “spread” calculation were computed as  
892 described above. Positions that had  $\geq 2\%$  of the total reads in the window were considered as  
893 meaningful TSSs, which were further classified into  $C_{-1}G_{+1}$ , non-CG  $Y_{-1}R_{+1}$  and non-  $Y_{-1}R_{+1}$   
894 based on TSS base and the preceding deoxynucleotide. Only TSSs within the “spread” (10<sup>th</sup> to  
895 90<sup>th</sup> percentile reads in the promoter windows) were used for subsequent analyses and plotting.  
896 XY scatter plots and the linear regression fits were generated using GraphPad Prism 7.

#### 897 **DECLARATIONS**

##### 898 **Ethics approval and consent to participate**

899 Not applicable.



900 **Consent for publication**

901 Not applicable

902 **Availability of data and materials**

903 Genomics datasets generated in the current study are available in the NCBI BioProject, under  
904 the accession number PRJNA522619. Promoters analyzed in yeast, genomic positions, and  
905 attributes (ChIP-exo median positions and +1 nucleosome positions) are described in  
906 **Additional File 3**. Published TSS datasets re-analyzed here may be accessed at: ArrayExpress  
907 accession E-MTAB-3188 (*S. pombe*, [95]), Sequence Read Archive accession SRX015329 (*D.*  
908 *melanogaster*, [39]), Gene Expression Omnibus (GEO) under accession GSE42117 (*D.*  
909 *melanogaster*, [96]), Sequence Read Archive SRA097279 and SRA104816 (*Danio rerio*, [97]),  
910 GEO under accession GSE60456 (Human, [98]). Coordinates for promoter windows in other  
911 species are described in **Additional Files 4-7**.

912 **Competing interests**

913 B.F.P. has a financial interest in Peconic, LLC, which utilizes the ChIP-exo technology  
914 implemented in this study and could potentially benefit from the outcomes of this research. All  
915 other authors declare that they have no competing interests.

916 **Funding**

917 Initial funding for this project was provided by grants from the National Institutes of Health  
918 R01GM097260 and Welch Foundation A-1763 to C.D.K. We acknowledge funding from NIH  
919 R01GM120450 to C.D.K. and R35GM118059 to B.E.N.

920 **Authors' contributions**

921 C.Q. analyzed data, made figures, contributed to writing the manuscript. H.J. initiated project,  
922 generated strains, prepared material for TSS-seq, generated material and libraries for MNase-  
923 seq, analyzed data, piloted most informatics approaches, and generated outline of the  
924 manuscript. I.V. generated libraries for TSS-seq. P.Č. generated strains for ChIP-exo analyses.  
925 J.A.L. collaborated with H.J. on nucleosome positioning analyses and generated scripts and  
926 code for the analyses. T.Z. provided informatics analysis of TSS-seq data. I.M. constructed  
927 strains and performed Northern blotting for promoter variant studies. S.S. initiated informatics  
928 analyses for TSS-seq in yeast. P.Č. constructed strains and performed Northern blotting for  
929 promoter variant studies. K.H.H. prepared ChIP-exo samples for sequencing. R.P.M. and C.D.J  
930 consulted on Illumina sequencing strategies and library preparation. S-H.Z. implemented  
931 MNase analyses as described in [93]. B.F.P. consulted on ChIP-exo and enabled sequencing of  
932 ChIP-exo samples. B.E.N provided funding and consulted on development of TSS-seq for yeast  
933 Pol II RNAs. C.D.K conceived the project, guided analyses, made figures and wrote the  
934 manuscript. All others read and approved the final manuscript except for S.S. who was unable  
935 to be contacted.

936 **Acknowledgements**

937 Mahmoud Bassal and Kaplan lab members are acknowledged for discussions and comments  
938 on the manuscript.

939

940 **REFERENCES**

- 941
- 942 1. Vo Ngoc L, Wang YL, Kassavetis GA, Kadonaga JT: **The punctilious RNA polymerase**  
943 **II core promoter**. *Genes Dev* 2017, **31**:1289-1301.
  - 944 2. Kadonaga JT: **Perspectives on the RNA polymerase II core promoter**. *Wiley*  
945 *Interdiscip Rev Dev Biol* 2012, **1**:40-51.

- 946 3. Juven-Gershon T, Kadonaga JT: **Regulation of gene expression via the core**  
947 **promoter and the basal transcriptional machinery.** *Dev Biol* 2010, **339**:225-229.
- 948 4. Juven-Gershon T, Hsu JY, Kadonaga JT: **Perspectives on the RNA polymerase II**  
949 **core promoter.** *Biochem Soc Trans* 2006, **34**:1047-1050.
- 950 5. Smale ST, Kadonaga JT: **The RNA polymerase II core promoter.** *Annu Rev Biochem*  
951 2003, **72**:449-479.
- 952 6. Butler JE, Kadonaga JT: **The RNA polymerase II core promoter: a key component in**  
953 **the regulation of gene expression.** *Genes Dev* 2002, **16**:2583-2592.
- 954 7. Rhee HS, Pugh BF: **Genome-wide structure and organization of eukaryotic pre-**  
955 **initiation complexes.** *Nature* 2012, **483**:295-301.
- 956 8. Weiner A, Hughes A, Yassour M, Rando OJ, Friedman N: **High-resolution**  
957 **nucleosome mapping reveals transcription-dependent promoter packaging.**  
958 *Genome Res* 2010, **20**:90-100.
- 959 9. Tirosh I, Barkai N, Verstrepen KJ: **Promoter architecture and the evolvability of gene**  
960 **expression.** *J Biol* 2009, **8**:95.
- 961 10. Jiang C, Pugh BF: **A compiled and systematic reference map of nucleosome**  
962 **positions across the *Saccharomyces cerevisiae* genome.** *Genome Biol* 2009,  
963 **10**:R109.
- 964 11. Tirosh I, Barkai N: **Two strategies for gene regulation by promoter nucleosomes.**  
965 *Genome Res* 2008, **18**:1084-1091.
- 966 12. Mavrich TN, Jiang C, Ioshikhes IP, Li X, Venters BJ, Zanton SJ, Tomsho LP, Qi J,  
967 Glaser RL, Schuster SC, et al: **Nucleosome organization in the *Drosophila* genome.**  
968 *Nature* 2008, **453**:358-362.
- 969 13. Xu Z, Wei W, Gagneur J, Perocchi F, Clauder-Munster S, Camblong J, Guffanti E, Stutz  
970 F, Huber W, Steinmetz LM: **Bidirectional promoters generate pervasive**  
971 **transcription in yeast.** *Nature* 2009, **457**:1033-1037.
- 972 14. Neil H, Malabat C, d'Aubenton-Carafa Y, Xu Z, Steinmetz LM, Jacquier A: **Widespread**  
973 **bidirectional promoters are the major source of cryptic transcripts in yeast.** *Nature*  
974 2009, **457**:1038-1042.
- 975 15. Preker P, Nielsen J, Kammler S, Lykke-Andersen S, Christensen MS, Mapendano CK,  
976 Schierup MH, Jensen TH: **RNA exosome depletion reveals transcription upstream**  
977 **of active human promoters.** *Science* 2008, **322**:1851-1854.
- 978 16. Core LJ, Lis JT: **Transcription regulation through promoter-proximal pausing of**  
979 **RNA polymerase II.** *Science* 2008, **319**:1791-1792.
- 980 17. Seila AC, Calabrese JM, Levine SS, Yeo GW, Rahl PB, Flynn RA, Young RA, Sharp PA:  
981 **Divergent transcription from active promoters.** *Science* 2008, **322**:1849-1851.

- 982 18. Jin Y, Eser U, Struhl K, Churchman LS: **The Ground State and Evolution of Promoter**  
983 **Region Directionality**. *Cell* 2017, **170**:889-898 e810.
- 984 19. Andersson R, Chen Y, Core L, Lis JT, Sandelin A, Jensen TH: **Human Gene Promoters**  
985 **Are Intrinsically Bidirectional**. *Mol Cell* 2015, **60**:346-347.
- 986 20. Duttke SH, Lacadie SA, Ibrahim MM, Glass CK, Corcoran DL, Benner C, Heinz S,  
987 Kadonaga JT, Ohler U: **Human promoters are intrinsically directional**. *Mol Cell* 2015,  
988 **57**:674-684.
- 989 21. Duttke SH, Lacadie SA, Ibrahim MM, Glass CK, Corcoran DL, Benner C, Heinz S,  
990 Kadonaga JT, Ohler U: **Perspectives on Unidirectional versus Divergent**  
991 **Transcription**. *Mol Cell* 2015, **60**:348-349.
- 992 22. Lee W, Tillo D, Bray N, Morse RH, Davis RW, Hughes TR, Nislow C: **A high-resolution**  
993 **atlas of nucleosome occupancy in yeast**. *Nat Genet* 2007, **39**:1235-1244.
- 994 23. Huisinga KL, Pugh BF: **A genome-wide housekeeping role for TFIID and a highly**  
995 **regulated stress-related role for SAGA in Saccharomyces cerevisiae**. *Mol Cell*  
996 2004, **13**:573-585.
- 997 24. Basehoar AD, Zanton SJ, Pugh BF: **Identification and distinct regulation of yeast**  
998 **TATA box-containing genes**. *Cell* 2004, **116**:699-709.
- 999 25. Kuras L, Kosa P, Mencia M, Struhl K: **TAF-Containing and TAF-independent forms of**  
1000 **transcriptionally active TBP in vivo**. *Science* 2000, **288**:1244-1248.
- 1001 26. Li XY, Bhaumik SR, Green MR: **Distinct classes of yeast promoters revealed by**  
1002 **differential TAF recruitment**. *Science* 2000, **288**:1242-1244.
- 1003 27. Wu R, Li H: **Positioned and G/C-capped poly(dA:dT) tracts associate with the**  
1004 **centers of nucleosome-free regions in yeast promoters**. *Genome Res* 2010, **20**:473-  
1005 484.
- 1006 28. Seizl M, Hartmann H, Hoeg F, Kurth F, Martin DE, Soding J, Cramer P: **A conserved**  
1007 **GA element in TATA-less RNA polymerase II promoters**. *PLoS One* 2011, **6**:e27595.
- 1008 29. Vo Ngoc L, Kassavetis GA, Kadonaga JT: **The RNA Polymerase II Core Promoter in**  
1009 **Drosophila**. *Genetics* 2019, **212**:13-24.
- 1010 30. Warfield L, Ramachandran S, Baptista T, Devys D, Tora L, Hahn S: **Transcription of**  
1011 **Nearly All Yeast RNA Polymerase II-Transcribed Genes Is Dependent on**  
1012 **Transcription Factor TFIID**. *Mol Cell* 2017, **68**:118-129 e115.
- 1013 31. Baptista T, Grunberg S, Minoungou N, Koster MJE, Timmers HTM, Hahn S, Devys D,  
1014 Tora L: **SAGA Is a General Cofactor for RNA Polymerase II Transcription**. *Mol Cell*  
1015 2017, **68**:130-143 e135.
- 1016 32. Hampsey M: **The Pol II initiation complex: finding a place to start**. *Nat Struct Mol Biol*  
1017 2006, **13**:564-566.

- 1018 33. Corden JL: **Yeast Pol II start-site selection: the long and the short of it.** *EMBO*  
1019 *reports* 2008, **9**:1084-1086.
- 1020 34. Zhang Z, Dietrich FS: **Mapping of transcription start sites in *Saccharomyces***  
1021 ***cerevisiae* using 5' SAGE.** *Nucleic acids research* 2005, **33**:2838-2851.
- 1022 35. Park D, Morris AR, Battenhouse A, Iyer VR: **Simultaneous mapping of transcript**  
1023 **ends at single-nucleotide resolution and identification of widespread promoter-**  
1024 **associated non-coding RNA governed by TATA elements.** *Nucleic Acids Res* 2014,  
1025 **42**:3736-3749.
- 1026 36. Pelechano V, Wei W, Steinmetz LM: **Extensive transcriptional heterogeneity**  
1027 **revealed by isoform profiling.** *Nature* 2013, **497**:127-131.
- 1028 37. Chen RA, Down TA, Stempor P, Chen QB, Egelhofer TA, Hillier LW, Jeffers TE,  
1029 Ahringer J: **The landscape of RNA polymerase II transcription initiation in *C.***  
1030 ***elegans* reveals promoter and enhancer architectures.** *Genome Res* 2013, **23**:1339-  
1031 1347.
- 1032 38. Yamashita R, Sathira NP, Kanai A, Tanimoto K, Arauchi T, Tanaka Y, Hashimoto S,  
1033 Sugano S, Nakai K, Suzuki Y: **Genome-wide characterization of transcriptional start**  
1034 **sites in humans by integrative transcriptome analysis.** *Genome Res* 2011, **21**:775-  
1035 789.
- 1036 39. Hoskins RA, Landolin JM, Brown JB, Sandler JE, Takahashi H, Lassmann T, Yu C,  
1037 Booth BW, Zhang D, Wan KH, et al: **Genome-wide analysis of promoter architecture**  
1038 **in *Drosophila melanogaster*.** *Genome Res* 2011, **21**:182-192.
- 1039 40. Consortium F, the RP, Clst, Forrest AR, Kawaji H, Rehli M, Baillie JK, de Hoon MJ,  
1040 Haberle V, Lassmann T, et al: **A promoter-level mammalian expression atlas.** *Nature*  
1041 2014, **507**:462-470.
- 1042 41. Nepal C, Hadzhiev Y, Previti C, Haberle V, Li N, Takahashi H, Suzuki AM, Sheng Y,  
1043 Abdelhamid RF, Anand S, et al: **Dynamic regulation of the transcription initiation**  
1044 **landscape at single nucleotide resolution during vertebrate embryogenesis.**  
1045 *Genome Res* 2013, **23**:1938-1950.
- 1046 42. Gleghorn ML, Davydova EK, Basu R, Rothman-Denes LB, Murakami KS: **X-ray crystal**  
1047 **structures elucidate the nucleotidyl transfer reaction of transcript initiation using**  
1048 **two nucleotides.** *Proc Natl Acad Sci U S A* 2011, **108**:3566-3571.
- 1049 43. Smale ST, Baltimore D: **The "initiator" as a transcription control element.** *Cell* 1989,  
1050 **57**:103-113.
- 1051 44. Vo Ngoc L, Cassidy CJ, Huang CY, Duttke SH, Kadonaga JT: **The human initiator is a**  
1052 **distinct and abundant element that is precisely positioned in focused core**  
1053 **promoters.** *Genes Dev* 2017, **31**:6-11.
- 1054 45. Sainsbury S, Niesser J, Cramer P: **Structure and function of the initially transcribing**  
1055 **RNA polymerase II-TFIIB complex.** *Nature* 2013, **493**:437-440.

- 1056 46. Sainsbury S, Bernecky C, Cramer P: **Structural basis of transcription initiation by**  
1057 **RNA polymerase II.** *Nat Rev Mol Cell Biol* 2015, **16**:129-143.
- 1058 47. Struhl K: **Promoters, activator proteins, and the mechanism of transcriptional**  
1059 **initiation in yeast.** *Cell* 1987, **49**:295-297.
- 1060 48. Breathnach R, Chambon P: **Organization and expression of eucaryotic split genes**  
1061 **coding for proteins.** *Annu Rev Biochem* 1981, **50**:349-383.
- 1062 49. Giardina C, Lis JT: **DNA melting on yeast RNA polymerase II promoters.** *Science*  
1063 1993, **261**:759-762.
- 1064 50. Yang C, Ponticelli AS: **Evidence that RNA polymerase II and not TFIIB is**  
1065 **responsible for the difference in transcription initiation patterns between**  
1066 **Saccharomyces cerevisiae and Schizosaccharomyces pombe.** *Nucleic Acids Res*  
1067 2012, **40**:6495-6507.
- 1068 51. Goel S, Krishnamurthy S, Hampsey M: **Mechanism of start site selection by RNA**  
1069 **polymerase II: interplay between TFIIB and Ssl2/XPB helicase subunit of TFIIF.** *J*  
1070 *Biol Chem* 2012, **287**:557-567.
- 1071 52. Khaperskyy DA, Ammerman ML, Majovski RC, Ponticelli AS: **Functions of**  
1072 **Saccharomyces cerevisiae TFIIF during transcription start site utilization.** *Mol Cell*  
1073 *Biol* 2008, **28**:3757-3766.
- 1074 53. Kuehner JN, Brow DA: **Quantitative analysis of in vivo initiator selection by yeast**  
1075 **RNA polymerase II supports a scanning model.** *J Biol Chem* 2006, **281**:14119-  
1076 14128.
- 1077 54. Pal M, Ponticelli AS, Luse DS: **The role of the transcription bubble and TFIIB in**  
1078 **promoter clearance by RNA polymerase II.** *Mol Cell* 2005, **19**:101-110.
- 1079 55. Majovski RC, Khaperskyy DA, Ghazy MA, Ponticelli AS: **A functional role for the**  
1080 **switch 2 region of yeast RNA polymerase II in transcription start site utilization**  
1081 **and abortive initiation.** *J Biol Chem* 2005, **280**:34917-34923.
- 1082 56. Freire-Picos MA, Krishnamurthy S, Sun ZW, Hampsey M: **Evidence that the Tfg1/Tfg2**  
1083 **dimer interface of TFIIF lies near the active center of the RNA polymerase II**  
1084 **initiation complex.** *Nucleic acids research* 2005, **33**:5045-5052.
- 1085 57. Ghazy MA, Brodie SA, Ammerman ML, Ziegler LM, Ponticelli AS: **Amino acid**  
1086 **substitutions in yeast TFIIF confer upstream shifts in transcription initiation and**  
1087 **altered interaction with RNA polymerase II.** *Mol Cell Biol* 2004, **24**:10975-10985.
- 1088 58. Chen BS, Hampsey M: **Functional interaction between TFIIB and the Rpb2 subunit**  
1089 **of RNA polymerase II: implications for the mechanism of transcription initiation.**  
1090 *Mol Cell Biol* 2004, **24**:3983-3991.
- 1091 59. Faitar SL, Brodie SA, Ponticelli AS: **Promoter-specific shifts in transcription**  
1092 **initiation conferred by yeast TFIIB mutations are determined by the sequence in**  
1093 **the immediate vicinity of the start sites.** *Mol Cell Biol* 2001, **21**:4427-4440.



- 1094 60. Pappas DL, Jr., Hampsey M: **Functional interaction between Ssu72 and the Rpb2**  
1095 **subunit of RNA polymerase II in Saccharomyces cerevisiae.** *Mol Cell Biol* 2000,  
1096 **20:8343-8351.**
- 1097 61. Wu WH, Pinto I, Chen BS, Hampsey M: **Mutational analysis of yeast TFIIB. A**  
1098 **functional relationship between Ssu72 and Sub1/Tsp1 defined by allele-specific**  
1099 **interactions with TFIIB.** *Genetics* 1999, **153:643-652.**
- 1100 62. Bangur CS, Faitar SL, Folster JP, Ponticelli AS: **An interaction between the N-**  
1101 **terminal region and the core domain of yeast TFIIB promotes the formation of**  
1102 **TATA-binding protein-TFIIB-DNA complexes.** *The Journal of biological chemistry*  
1103 1999, **274:23203-23209.**
- 1104 63. Pardee TS, Bangur CS, Ponticelli AS: **The N-terminal region of yeast TFIIB contains**  
1105 **two adjacent functional domains involved in stable RNA polymerase II binding and**  
1106 **transcription start site selection.** *The Journal of biological chemistry* 1998,  
1107 **273:17859-17864.**
- 1108 64. Sun ZW, Tessmer A, Hampsey M: **Functional interaction between TFIIB and the**  
1109 **Rpb9 (Ssu73) subunit of RNA polymerase II in Saccharomyces cerevisiae.** *Nucleic*  
1110 *acids research* 1996, **24:2560-2566.**
- 1111 65. Sun ZW, Hampsey M: **Identification of the gene (SSU71/TFG1) encoding the largest**  
1112 **subunit of transcription factor TFIIF as a suppressor of a TFIIB mutation in**  
1113 **Saccharomyces cerevisiae.** *Proceedings of the National Academy of Sciences of the*  
1114 *United States of America* 1995, **92:3127-3131.**
- 1115 66. Pinto I, Wu WH, Na JG, Hampsey M: **Characterization of sua7 mutations defines a**  
1116 **domain of TFIIB involved in transcription start site selection in yeast.** *J Biol Chem*  
1117 1994, **269:30569-30573.**
- 1118 67. Berroteran RW, Ware DE, Hampsey M: **The sua8 suppressors of Saccharomyces**  
1119 **cerevisiae encode replacements of conserved residues within the largest subunit**  
1120 **of RNA polymerase II and affect transcription start site selection similarly to sua7**  
1121 **(TFIIB) mutations.** *Mol Cell Biol* 1994, **14:226-237.**
- 1122 68. Pinto I, Ware DE, Hampsey M: **The yeast SUA7 gene encodes a homolog of human**  
1123 **transcription factor TFIIB and is required for normal start site selection in vivo.**  
1124 *Cell* 1992, **68:977-988.**
- 1125 69. Hampsey M, Na JG, Pinto I, Ware DE, Berroteran RW: **Extragenic suppressors of a**  
1126 **translation initiation defect in the cyc1 gene of Saccharomyces cerevisiae.**  
1127 *Biochimie* 1991, **73:1445-1455.**
- 1128 70. Knaus R, Pollock R, Guarente L: **Yeast SUB1 is a suppressor of TFIIB mutations and**  
1129 **has homology to the human co-activator PC4.** *Embo J* 1996, **15:1933-1940.**
- 1130 71. Jin H, Kaplan CD: **Relationships of RNA polymerase II genetic interactors to**  
1131 **transcription start site usage defects and growth in Saccharomyces cerevisiae.** *G3*  
1132 *(Bethesda)* 2014, **5:21-33.**

- 1133 72. Braberg H, Jin H, Moehle EA, Chan YA, Wang S, Shales M, Benschop JJ, Morris JH,  
1134 Qiu C, Hu F, et al: **From structure to systems: high-resolution, quantitative genetic**  
1135 **analysis of RNA polymerase II.** *Cell* 2013, **154**:775-788.
- 1136 73. Kaplan CD, Jin H, Zhang IL, Belyanin A: **Dissection of Pol II trigger loop function and**  
1137 **Pol II activity-dependent control of start site selection in vivo.** *PLoS Genet* 2012,  
1138 **8**:e1002627.
- 1139 74. Eichner J, Chen HT, Warfield L, Hahn S: **Position of the general transcription factor**  
1140 **TFIIF within the RNA polymerase II transcription preinitiation complex.** *EMBO J*  
1141 2010, **29**:706-716.
- 1142 75. Kaplan CD, Larsson KM, Kornberg RD: **The RNA polymerase II trigger loop functions**  
1143 **in substrate selection and is directly targeted by alpha-amanitin.** *Mol Cell* 2008,  
1144 **30**:547-556.
- 1145 76. Kireeva ML, Nedialkov YA, Cremona GH, Purtov YA, Lubkowska L, Malagon F, Burton  
1146 ZF, Strathern JN, Kashlev M: **Transient reversal of RNA polymerase II active site**  
1147 **closing controls fidelity of transcription elongation.** *Mol Cell* 2008, **30**:557-566.
- 1148 77. Malagon F, Kireeva ML, Shafer BK, Lubkowska L, Kashlev M, Strathern JN: **Mutations**  
1149 **in the *Saccharomyces cerevisiae* RPB1 gene conferring hypersensitivity to 6-**  
1150 **azauracil.** *Genetics* 2006, **172**:2201-2209.
- 1151 78. Qiu C, Erinne OC, Dave JM, Cui P, Jin H, Muthukrishnan N, Tang LK, Babu SG, Lam  
1152 KC, Vandeventer PJ, et al: **High-Resolution Phenotypic Landscape of the RNA**  
1153 **Polymerase II Trigger Loop.** *PLoS Genet* 2016, **12**:e1006321.
- 1154 79. Lubliner S, Keren L, Segal E: **Sequence features of yeast and human core**  
1155 **promoters that are predictive of maximal promoter activity.** *Nucleic Acids Res* 2013,  
1156 **41**:5569-5581.
- 1157 80. Lubliner S, Regev I, Lotan-Pompan M, Edelheit S, Weinberger A, Segal E: **Core**  
1158 **promoter sequence in yeast is a major determinant of expression level.** *Genome*  
1159 *Res* 2015, **25**:1008-1017.
- 1160 81. Kamenova I, Warfield L, Hahn S: **Mutations on the DNA binding surface of TBP**  
1161 **discriminate between yeast TATA and TATA-less gene transcription.** *Mol Cell Biol*  
1162 2014, **34**:2929-2943.
- 1163 82. Donczew R, Hahn S: **Mechanistic Differences in Transcription Initiation at TATA-**  
1164 **Less and TATA-Containing Promoters.** *Mol Cell Biol* 2018, **38**.
- 1165 83. Lorch Y, Maier-Davis B, Kornberg RD: **Role of DNA sequence in chromatin**  
1166 **remodeling and the formation of nucleosome-free regions.** *Genes Dev* 2014,  
1167 **28**:2492-2497.
- 1168 84. Krietenstein N, Wal M, Watanabe S, Park B, Peterson CL, Pugh BF, Korber P: **Genomic**  
1169 **Nucleosome Organization Reconstituted with Pure Proteins.** *Cell* 2016, **167**:709-  
1170 721 e712.

- 1171 85. Rhee HS, Pugh BF: **ChIP-exo method for identifying genomic location of DNA-**  
1172 **binding proteins with near-single-nucleotide accuracy.** *Curr Protoc Mol Biol* 2012,  
1173 **Chapter 21:Unit 21 24.**
- 1174 86. Rossi MJ, Lai WKM, Pugh BF: **Genome-wide determinants of sequence-specific**  
1175 **DNA binding of general regulatory factors.** *Genome Res* 2018, **28**:497-508.
- 1176 87. Fazal FM, Meng CA, Murakami K, Kornberg RD, Block SM: **Real-time observation of**  
1177 **the initiation of RNA polymerase II transcription.** *Nature* 2015, **525**:274-277.
- 1178 88. Tomko EJ, Fishburn J, Hahn S, Galburt EA: **TFIIH generates a six-base-pair open**  
1179 **complex during RNAP II transcription initiation and start-site scanning.** *Nat Struct*  
1180 *Mol Biol* 2017, **24**:1139-1145.
- 1181 89. Love MI, Huber W, Anders S: **Moderated estimation of fold change and dispersion**  
1182 **for RNA-seq data with DESeq2.** *Genome Biol* 2014, **15**:550.
- 1183 90. Warner JR: **The economics of ribosome biosynthesis in yeast.** *Trends Biochem Sci*  
1184 1999, **24**:437-440.
- 1185 91. Bhuiyan T, Timmers HTM: **Promoter Recognition: Putting TFIID on the Spot.** *Trends*  
1186 *Cell Biol* 2019.
- 1187 92. Tramantano M, Sun L, Au C, Labuz D, Liu Z, Chou M, Shen C, Luk E: **Constitutive**  
1188 **turnover of histone H2A.Z at yeast promoters requires the preinitiation complex.**  
1189 *Elife* 2016, **5**.
- 1190 93. Zhou X, Blocker AW, Airoidi EM, O'Shea EK: **A computational approach to map**  
1191 **nucleosome positions and alternative chromatin states with base pair resolution.**  
1192 *Elife* 2016, **5**.
- 1193 94. Xu C, Park JK, Zhang J: **Evidence that alternative transcriptional initiation is largely**  
1194 **nonadaptive.** *PLoS Biol* 2019, **17**:e3000197.
- 1195 95. Li H, Hou J, Bai L, Hu C, Tong P, Kang Y, Zhao X, Shao Z: **Genome-wide analysis of**  
1196 **core promoter structures in Schizosaccharomyces pombe with DeepCAGE.** *RNA*  
1197 *Biol* 2015, **12**:525-537.
- 1198 96. Kwak H, Fuda NJ, Core LJ, Lis JT: **Precise maps of RNA polymerase reveal how**  
1199 **promoters direct initiation and pausing.** *Science* 2013, **339**:950-953.
- 1200 97. Haberle V, Li N, Hadzhiev Y, Plessy C, Previti C, Nepal C, Gehrig J, Dong X, Akalin A,  
1201 Suzuki AM, et al: **Two independent transcription initiation codes overlap on**  
1202 **vertebrate core promoters.** *Nature* 2014, **507**:381-385.
- 1203 98. Core LJ, Martins AL, Danko CG, Waters CT, Siepel A, Lis JT: **Analysis of nascent**  
1204 **RNA identifies a unified architecture of initiation regions at mammalian promoters**  
1205 **and enhancers.** *Nat Genet* 2014, **46**:1311-1320.
- 1206 99. Struhl K: **Molecular mechanisms of transcriptional regulation in yeast.** *Annual*  
1207 *review of biochemistry* 1989, **58**:1051-1077.

- 1208 100. Kaplan CD: **Basic mechanisms of RNA polymerase II activity and alteration of gene**  
1209 **expression in *Saccharomyces cerevisiae***. *Biochim Biophys Acta* 2013, **1829**:39-54.
- 1210 101. Fishburn J, Galburt E, Hahn S: **Transcription Start Site Scanning and the**  
1211 **Requirement for ATP during Transcription Initiation by RNA Polymerase II**. *J Biol*  
1212 *Chem* 2016, **291**:13040-13047.
- 1213 102. Lai WK, Pugh BF: **Genome-wide uniformity of human 'open' pre-initiation**  
1214 **complexes**. *Genome Res* 2017, **27**:15-26.
- 1215 103. Shao W, Zeitlinger J: **Paused RNA polymerase II inhibits new transcriptional**  
1216 **initiation**. *Nat Genet* 2017, **49**:1045-1051.
- 1217 104. Scruggs BS, Gilchrist DA, Nechaev S, Muse GW, Burkholder A, Fargo DC, Adelman K:  
1218 **Bidirectional Transcription Arises from Two Distinct Hubs of Transcription Factor**  
1219 **Binding and Active Chromatin**. *Mol Cell* 2015, **58**:1101-1112.
- 1220 105. Kaplan CD: **Pairs of promoter pairs in a web of transcription**. *Nat Genet* 2016,  
1221 **48**:975-976.
- 1222 106. Core LJ, Waterfall JJ, Lis JT: **Nascent RNA sequencing reveals widespread pausing**  
1223 **and divergent initiation at human promoters**. *Science* 2008, **322**:1845-1848.
- 1224 107. Murakami K, Mattei PJ, Davis RE, Jin H, Kaplan CD, Kornberg RD: **Uncoupling**  
1225 **Promoter Opening from Start-Site Scanning**. *Mol Cell* 2015, **59**:133-138.
- 1226 108. Singh A, Compe E, Le May N, Egly JM: **TFIIH subunit alterations causing xeroderma**  
1227 **pigmentosum and trichothiodystrophy specifically disturb several steps during**  
1228 **transcription**. *Am J Hum Genet* 2015, **96**:194-207.
- 1229 109. Egly JM, Coin F: **A history of TFIIH: two decades of molecular biology on a pivotal**  
1230 **transcription/repair factor**. *DNA Repair (Amst)* 2011, **10**:714-721.
- 1231 110. Compe E, Egly JM: **TFIIH: when transcription met DNA repair**. *Nat Rev Mol Cell Biol*  
1232 2012, **13**:343-354.
- 1233 111. Clapier CR, Iwasa J, Cairns BR, Peterson CL: **Mechanisms of action and regulation**  
1234 **of ATP-dependent chromatin-remodelling complexes**. *Nat Rev Mol Cell Biol* 2017,  
1235 **18**:407-422.
- 1236 112. Ghaemmaghami S, Huh WK, Bower K, Howson RW, Belle A, Dephoure N, O'Shea EK,  
1237 Weissman JS: **Global analysis of protein expression in yeast**. *Nature* 2003, **425**:737-  
1238 741.
- 1239 113. Winston F, Dollard C, Ricupero-Hovasse SL: **Construction of a set of convenient**  
1240 ***Saccharomyces cerevisiae* strains that are isogenic to S288C**. *Yeast* 1995, **11**:53-  
1241 55.
- 1242 114. Boeke JD, Trueheart J, Natsoulis G, Fink GR: **5-Fluoroorotic acid as a selective agent**  
1243 **in yeast molecular genetics**. *Methods Enzymol* 1987, **154**:164-175.



- 1244 115. Xia Y, Chu W, Qi Q, Xun L: **New insights into the QuikChange process guide the**  
1245 **use of Phusion DNA polymerase for site-directed mutagenesis.** *Nucleic Acids Res*  
1246 2015, **43**:e12.
- 1247 116. Schmitt ME, Brown TA, Trumppower BL: **A rapid and simple method for preparation of**  
1248 **RNA from *Saccharomyces cerevisiae*.** *Nucleic acids research* 1990, **18**:3091-3092.
- 1249 117. Goldman SR, Sharp JS, Vvedenskaya IO, Livny J, Dove SL, Nickels BE: **NanoRNAs**  
1250 **prime transcription initiation in vivo.** *Mol Cell* 2011, **42**:817-825.
- 1251 118. Vvedenskaya IO, Goldman SR, Nickels BE: **Preparation of cDNA libraries for high-**  
1252 **throughput RNA sequencing analysis of RNA 5' ends.** *Methods Mol Biol* 2015,  
1253 **1276**:211-228.
- 1254 119. Trapnell C, Pachter L, Salzberg SL: **TopHat: discovering splice junctions with RNA-**  
1255 **Seq.** *Bioinformatics* 2009, **25**:1105-1111.
- 1256 120. Langmead B, Trapnell C, Pop M, Salzberg SL: **Ultrafast and memory-efficient**  
1257 **alignment of short DNA sequences to the human genome.** *Genome Biol* 2009,  
1258 **10**:R25.
- 1259 121. Quinlan AR, Hall IM: **BEDTools: a flexible suite of utilities for comparing genomic**  
1260 **features.** *Bioinformatics* 2010, **26**:841-842.
- 1261 122. Saldanha AJ: **Java Treeview--extensible visualization of microarray data.**  
1262 *Bioinformatics* 2004, **20**:3246-3248.
- 1263 123. de Hoon MJ, Imoto S, Nolan J, Miyano S: **Open source clustering software.**  
1264 *Bioinformatics* 2004, **20**:1453-1454.
- 1265 124. Ramirez F, Dundar F, Diehl S, Gruning BA, Manke T: **deepTools: a flexible platform**  
1266 **for exploring deep-sequencing data.** *Nucleic Acids Res* 2014, **42**:W187-191.
- 1267 125. Rhee HS, Pugh BF: **Comprehensive genome-wide protein-DNA interactions**  
1268 **detected at single-nucleotide resolution.** *Cell* 2011, **147**:1408-1419.
- 1269 126. van Bakel H, Tsui K, Gebbia M, Mnaimneh S, Hughes TR, Nislow C: **A compendium of**  
1270 **nucleosome and transcript profiles reveals determinants of chromatin**  
1271 **architecture and transcription.** *PLoS Genet* 2013, **9**:e1003479.
- 1272 127. Langmead B, Salzberg SL: **Fast gapped-read alignment with Bowtie 2.** *Nat Methods*  
1273 2012, **9**:357-359.
- 1274 128. Li H, Handsaker B, Wysoker A, Fennell T, Ruan J, Homer N, Marth G, Abecasis G,  
1275 Durbin R, Genome Project Data Processing S: **The Sequence Alignment/Map format**  
1276 **and SAMtools.** *Bioinformatics* 2009, **25**:2078-2079.
- 1277 129. Abante J: **NucSeq v1.0.** v1.0 edition: Zenodo; 2016.

1278  
1279 **FIGURE LEGENDS**

1280

1281 **Figure 1. Genome-wide analysis of TSS selection in *S. cerevisiae*.** **A.** Overview of method  
1282 and description of metrics used in analyzing TSS distributions at yeast promoters. **B.**  
1283 Reproducibility of TSS-seq analysis demonstrated by correlation plots determine RNA 5' ends  
1284 across all genome positions with  $\geq 3$  reads in each library for biological replicates of WT, *rpb1*  
1285 E1103G, and *rpb1* H1085Y libraries. **C.** Heat map illustrating hierarchical clustering of Pearson  
1286 correlation coefficients between aggregate (combined biological replicate) libraries for all  
1287 strains. Clustering distinguishes known reduced function *rpb1* alleles ("slow" or LOF) and  
1288 increased activity *rpb1* alleles ("fast" or GOF). **D.** TSSs generally map downstream of core  
1289 promoters predicted by Rhee and Pugh from GTF ChIP-exo data. **E.** Basic metrics of TSS  
1290 distribution changes distinguish classes of TSS-usage affecting alleles. Determination of change  
1291 in median TSS position (upstream shift in median position is negative, downstream shift in  
1292 median position is positive, see Methods) or change in width of TSS distribution (see A, " $\Delta$  TSS  
1293 spread") are sufficient to differentiate two main classes of *rpb1* mutants and separate them from  
1294 GTF mutants. Heat maps show individual yeast promoter regions on the y-axis and the  
1295 measured TSS shift or  $\Delta$ TSS Spread from TSS-seq data for TSS-usage affecting mutants on  
1296 the x-axis hierarchically clustered in both dimensions.

1297 **Figure 2. Pol II and GTF mutants confer polar shifts in TSS-usage across all promoter**  
1298 **classes in *S. cerevisiae*.** **A.** Heat maps show TSS distribution changes in a fast (E1103G) or a  
1299 slow (H1085Y) Pol II mutant relative to WT. 401 nt promoter windows were anchored on  
1300 measured median TSS position in our WT strain and TSS distributions in WT or mutant strains  
1301 were normalized to 100%. Differences in distribution between WT and mutant TSS usage were  
1302 determined by subtracting the normalized WT distribution from normalized mutant distributions.  
1303 Promoters are separated into those classified as Taf1-enriched, Taf1-depleted, or neither and  
1304 rank-ordered on the y-axis based on total reads in WT (from high to low). Gain in relative mutant  
1305 TSS usage is positive while loss in relative mutant usage is negative. **B.** Significant polar shifts  
1306 in TSS usage are apparent for examined *rpb1* mutants (except *rpb1* F1084I) across promoter  
1307 classes. All box plots are Tukey plots unless otherwise noted (see Methods). Promoters  
1308 examined are  $n=3494$  ( $>200$  reads total expression in WT). **C.** Significant polar shifts in TSS  
1309 usage are apparent for examined GTF mutants and an *rpb1 tfg2* double mutant shows  
1310 exacerbated TSS shifts relative to the single mutants (compare C to B). Promoters examined  
1311 are as in (B). **D.** Average TSS shifts in Pol II *rpb1* mutants correlate with their measured in vitro  
1312 elongation rates. Error bars on TSS shifts and elongation rates are bounds of the 95%  
1313 confidence intervals of the means. Elongation rates are from [73, 75]. Mutants slower than WT  
1314 in vitro exhibit downstream shifts in TSS distributions while mutants faster than WT in vitro  
1315 exhibit upstream shifts in TSS distributions correlating with the strengths of their in vitro  
1316 elongation rate defects and their in vivo growth rate defects. Promoters examined are as in  
1317 (B,C).

1318 **Figure 3. TSS motif usage and alterations in TSS-usage affecting mutants.** **A.** Preferred Y-  
1319 1R+1 motif usage observed in our data as expected. *S. cerevisiae* selective enrichment of A at -  
1320 8 is apparent at the most highly used starts in promoters with higher expression (compare  
1321 primary/top ( $1^\circ$ ) TSSs with secondary ( $2^\circ$ ) or tertiary TSSs from promoters within the top decile  
1322 of expression). Promoters exhibiting very narrow TSS spreads (focused) show additional minor  
1323 enrichments for bases near the TSS. **B.** Overall TSS motif usage in WT and TSS-usage  
1324 affecting mutants. Motifs were separated by -8 -1 +1 identities (64 motifs) as the vast majority of  
1325 TSS reads derive from  $N_8Y_{-1}R_{+1}$  sequences. (Top) Percent motif usage determined for  
1326 individual strains and displayed in heat map hierarchically clustered on y-axis to group strains  
1327 with similar motif usage distribution. (Bottom) Difference heat map illustrating relative changes  
1328 in  $N_8Y_{-1}R_{+1}$  motif usage in heat map hierarchically clustered on y-axis to group strains with  
1329 similar motif usage difference distribution. **C.** Alteration in motif usage and apparent changes to  
1330 reliance on an  $A_{-8}$  could arise from a number of possibilities. Alterations in TSS efficiencies in

1331 mutants could result in upstream or downstream shifts in TSS distribution if mutants have  
1332 decreased or increased reliance, respectively, on a particular motif. Conversely, alteration in  
1333 initiation efficiency in general (increase or decrease) could alter TSS motif usage if TSS motifs  
1334 are unevenly distributed across yeast promoters (example distribution for hypothetical motif *M*).  
1335 **D.** TSS motifs are unevenly distributed across yeast promoters and differentially enriched  
1336 correlating with steady state promoter expression levels. (Top) the apparent highest used  $A_{-8}Y_{-1}R_{+1}$   
1337 motif ( $A_{-8}C_{-1}A_{+1}$ ) and (bottom) the less preferred  $T_{-8}T_{-1}A_{+1}$  motif are compared for Taf1-  
1338 enriched or Taf1-depleted promoters.

1339 **Figure 4. TSS-usage mutants alter TSS usage efficiencies across TSS motifs consistent**  
1340 **with promoter scanning initiation at all promoters. A.** Median usage (left) or “efficiency”  
1341 (right) for  $A_{-8}C_{-1}A_{+1}$  sites across promoters in WT, *rpb1* E1103G, or *rpb1* H1085Y strains for  
1342 Taf1-enriched (left pair of graphs) or Taf1-depleted promoters (right pair of graphs). Usage is  
1343 defined as median percent reads found at any  $A_{-8}C_{-1}A_{+1}$  sites by promoter position relative to a  
1344 baseline position (the median TSS in WT). Efficiency is calculated from a model that assumes  
1345 promoter scanning from upstream to downstream positions and is defined as number of TSS-  
1346 seq reads mapping to a genome position divided by the sum of those reads and any  
1347 downstream reads within a defined promoter window. *rpb1* E1103G and *rpb1* H1085Y both shift  
1348 usage but alter efficiency differently. **B.** Altered usage across TSS motifs in TSS-usage affecting  
1349 mutants. Heat maps show difference in aggregate usage normalized to promoter number for  
1350 different  $N_{-8}Y_{-1}R_{+1}$  TSS motifs. Strains are ordered on the x-axis from left-to-right from strongest  
1351 downstream shifter to strongest upstream shifter. Promoter positions from -100 (upstream) to  
1352 +100 (downstream) flanking the median TSS position in WT. Regardless of promoter class,  
1353 TSS-usage affecting mutants cause polar effects on distribution of TSS usage when examining  
1354 motifs separately. **C.** Motif efficiency calculated as in (A) for a subset of  $N_{-8}Y_{-1}R_{+1}$  TSS motifs for  
1355 all mutants. Heat maps are ordered as in (B). Downstream shifting mutants in (B) generally  
1356 reduce TSS usage efficiencies across promoter positions. Upstream shifting mutants in (B)  
1357 generally shift TSS efficiencies upstream.

1358 **Figure 5. Attributes of core promoter classes and PIC positioning in TSS-usage affecting**  
1359 **mutants. A.** Enrichment by expression decile in WT of putative core promoter elements in Taf1-  
1360 enriched and Taf1-depleted promoters. TATA consensus (TATAWAWR, W=A/T, R=A/G) is  
1361 enriched in Taf1-depleted promoters while the GA-rich element (GAAAAA) is enriched in Taf1-  
1362 enriched promoters. Yeast promoters are relatively AT-rich so there is a high probability of  
1363 “TATA-like” elements differing from the TATA consensus by two mismatches. **B.** Tested GAE or  
1364 TATA-like elements do not greatly contribute to expression from promoters where tested.  
1365 Expression by Northern blotting for promoters or classes of promoter mutant fused to a reporter  
1366 gene. Promoter mutants are normalized to the respective WT for each promoter. “Delete”  
1367 mutants represent deletions of particular element types. “Mutant” elements represent elements  
1368 where base composition has been altered. **C.** GTF positioning by promoter classes determined  
1369 by ChiP-exo for Sua7 (TFIIB) or Ssl2 (TFIIH). For each promoter, the median position of ChiP-  
1370 exo reads on the top (TOP) or bottom (BOT) DNA strand was used to estimate GTF positioning.  
1371 Left graph shows histogram of estimated GTF positions for Taf1-enriched promoters while right  
1372 graph shows histogram of estimated GTF positions for Taf1-depleted promoters. **D.** Pol II  
1373 mutant effects on GTF positioning as detected by ChiP-exo for Sua7 (TFIIB) or Ssl2 (TFIIH).  
1374 Aggregate ChiP-exo signal for Taf1-enriched or depleted promoters on top (TOP) or bottom  
1375 (BOT) DNA strands in WT, *rpb1* H1085Y, or *rpb1* E1103G. Curves on graph indicate LOWESS  
1376 smoothing of aggregate ChiP-exo reads for the top 50% of promoters determined by ChiP-exo  
1377 reads in WT cells.

1378 **Figure 6. Promoter architecture influences sensitivity to TSS-usage affecting mutants. A-**  
1379 **C.** Distance of TSS to GTF position or core promoter position can correlate with extent of TSS

1380 shift in TSS mutants. Dashed lines are linear regression plots for TSS shift vs. GTF to TSS  
1381 distance. GTF position determined by average of median ChiP-exo signal from top and bottom  
1382 DNA strands for Sua7 and Ssl for **A.** Taf1-enriched promoters or **B.** Taf1-depleted promoters. **C.**  
1383 Core promoter-TSS distance for Taf1-depleted TATA-element containing promoters correlates  
1384 with extent of TSS shifts in TSS-usage affecting mutants. Dashed lines are linear regression  
1385 plots for TSS shift vs. TATA-element to TSS distance for Taf1-depleted promoters with TATA  
1386 elements. **D.** Correlation of differential expression ( $\log_2(\text{mutant/WT})$ ) with TSS to PIC distance  
1387 for Taf1-enriched promoters. **E.** Correlation of differential expression ( $\log_2(\text{mutant/WT})$ ) with  
1388 TSS to PIC distance for Taf1-depleted promoters.

1389 **Figure 7. Relationship of promoter chromatin architecture to PIC position and effects of**  
1390 **TSS-usage affecting mutants on nucleosome positioning.** **A.** Nucleosome midpoints as  
1391 determined by MNase-seq (dashed lines) and GTF ChiP-exo signals for Taf1-enriched  
1392 promoters (solid line smoothes of scatter plots) are aggregated by promoter quintiles  
1393 determined by TSS+1 nucleosome midpoint position. Nucleosome midpoints are from WT  
1394 strain and the same data are shown as reference for each ChiP-exo plot. First to fifth quintiles  
1395 are promoters with the closest +1 nucleosome to furthest, respectively. Fifth quintile promoters  
1396 likely have a weak +1 nucleosome and thus the determined +1 nucleosome is in some cases  
1397 like the +2. ChiP-exo aggregate data shows correlation with +1 nucleosome-TSS distance. **B.**  
1398 Nucleosome positioning in WT and H1085Y for Taf1-enriched promoters aligned by +1  
1399 nucleosome in WT (left), over genes (-200 to +800 from +1 nucleosome position, right). **C.**  
1400 Determined +1 nucleosome position for WT and H1085Y Taf1-enriched promoters for individual  
1401 MNase-seq libraries relative to position determined by averaging the four WT libraries. Box plots  
1402 are Tukey plots (see Methods). **D. and E.** Nucleosome positioning analyses as in B, C for top  
1403 expression decile Taf1-enriched promoters for WT and H1085Y. **F. and G.** Nucleosome  
1404 positioning analyses as in B, C for bottom expression decile Taf1-enriched promoters for WT  
1405 and *rpb1* H1085Y. **H. and I.** Nucleosome positioning analyses as in B, C for Taf1-enriched  
1406 promoters for *rpb1* E1103G. WT data from B, C shown as reference.

1407 **Figure 8. TSS distribution characteristics for select eukaryotes.** **A.** TSS spread (distance  
1408 defining positions of 10%-90% percentile of the TSS distribution) plotted for Taf1-enriched (left)  
1409 or depleted (right) promoters separated by expression decile for WT yeast. Spread determined  
1410 here for 401 nt promoter windows. **B.** Distribution of promoter “widths” (TSS spread) for TSS-  
1411 seq for 101 nt promoter windows across a number of eukaryotic TSS-seq or related  
1412 methodologies, including *S. cerevisiae* (WT data from this work), *S. pombe* (Li *et al*), *D.*  
1413 *melanogaster* (Hoskins *et al* CAGE or Kwak *et al* PRO-cap), *Danio rerio* Zebrafish Maternal  
1414 promoters (512 stage) or Zygotic (prim20) (Haberle *et al*), or Human PRO-cap data (Core *et al*).  
1415 **C.** Number of available YR dinucleotides within spread regions for promoters in (B) with the  
1416 following alterations. *S. pombe* promoter class limited to “notSP” (not single TSS promoters) as  
1417 defined by Li *et al*. M1 and M2 classes for human data as defined by Core *et al* are separated.  
1418 Hoskins *et al* CAGE data were not analyzed due to CAGE artifact potential for adding an extra  
1419 untemplated C during reverse transcription of RNA 5' ends. **D.** Number of Y<sub>-1</sub>R<sub>+1</sub> dinucleotides  
1420 used at  $\geq 2\%$  of total reads for promoter region vs. spread width for promoters in (C). Fraction of  
1421 non-CpG Y<sub>-1</sub>R<sub>+1</sub> dinucleotides used at  $\geq 2\%$  of total reads for a promoter region relative to  
1422 available non-CpG Y<sub>-1</sub>R<sub>+1</sub> dinucleotides vs spread width for promoters in (C).

1423  
1424  
1425  
1426



1427 FIGURES AND FIGURE LEGENDS

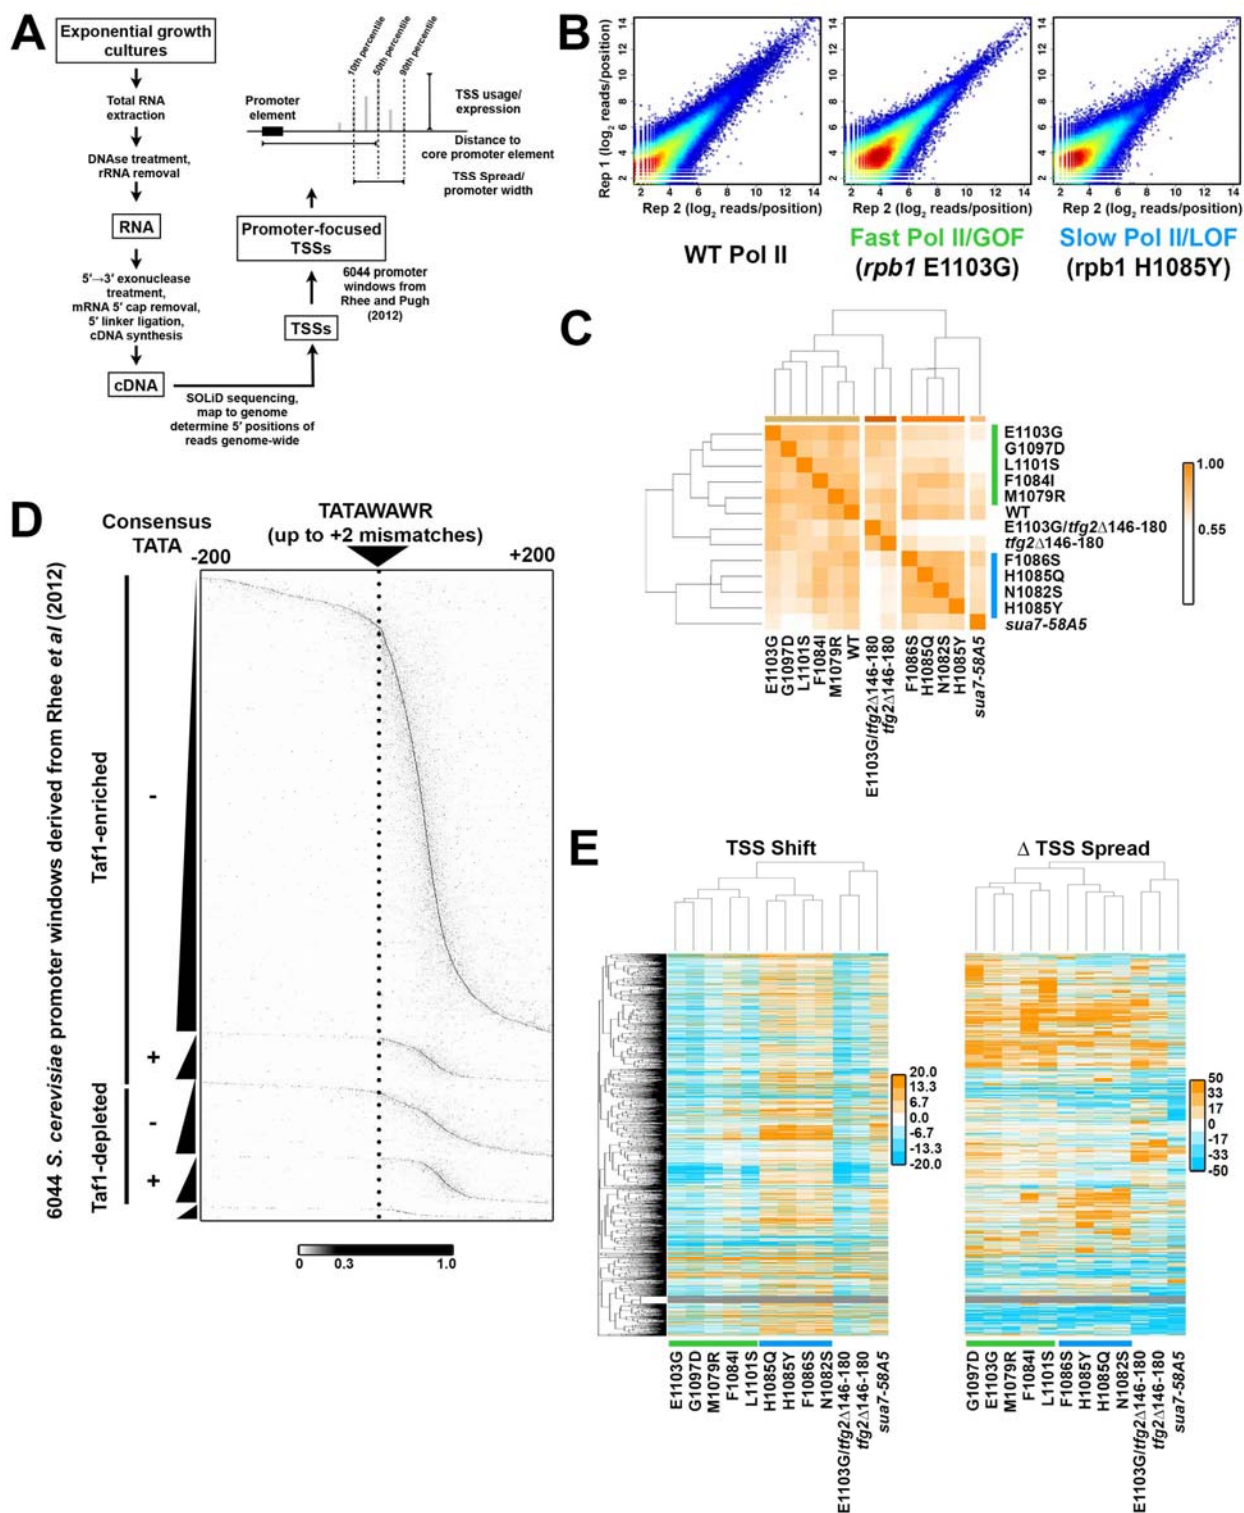

1429 **Figure 1. Genome-wide analysis of TSS selection in *S. cerevisiae*.** **A.** Overview of method  
1430 and description of metrics used in analyzing TSS distributions at yeast promoters. **B.**  
1431 Reproducibility of TSS-seq analysis demonstrated by correlation plots determine RNA 5' ends  
1432 across all genome positions with  $\geq 3$  reads in each library for biological replicates of WT, *rpb1*  
1433 E1103G, and *rpb1* H1085Y libraries. **C.** Heat map illustrating hierarchical clustering of Pearson  
1434 correlation coefficients between aggregate (combined biological replicate) libraries for all  
1435 strains. Clustering distinguishes known reduced function *rpb1* alleles ("slow" or LOF) and  
1436 increased activity *rpb1* alleles ("fast" or GOF). **D.** TSSs generally map downstream of core  
1437 promoters predicted by Rhee and Pugh from GTF ChIP-exo data. **E.** Basic metrics of TSS  
1438 distribution changes distinguish classes of TSS-usage affecting alleles. Determination of change  
1439 in median TSS position (upstream shift in median position is negative, downstream shift in  
1440 median position is positive, see Methods) or change in width of TSS distribution (see A, " $\Delta$  TSS  
1441 spread") are sufficient to differentiate two main classes of *rpb1* mutants and separate them from  
1442 GTF mutants. Heat maps show individual yeast promoter regions on the y-axis and the  
1443 measured TSS shift or  $\Delta$ TSS Spread from TSS-seq data for TSS-usage affecting mutants on  
1444 the x-axis hierarchically clustered in both dimensions.

1445

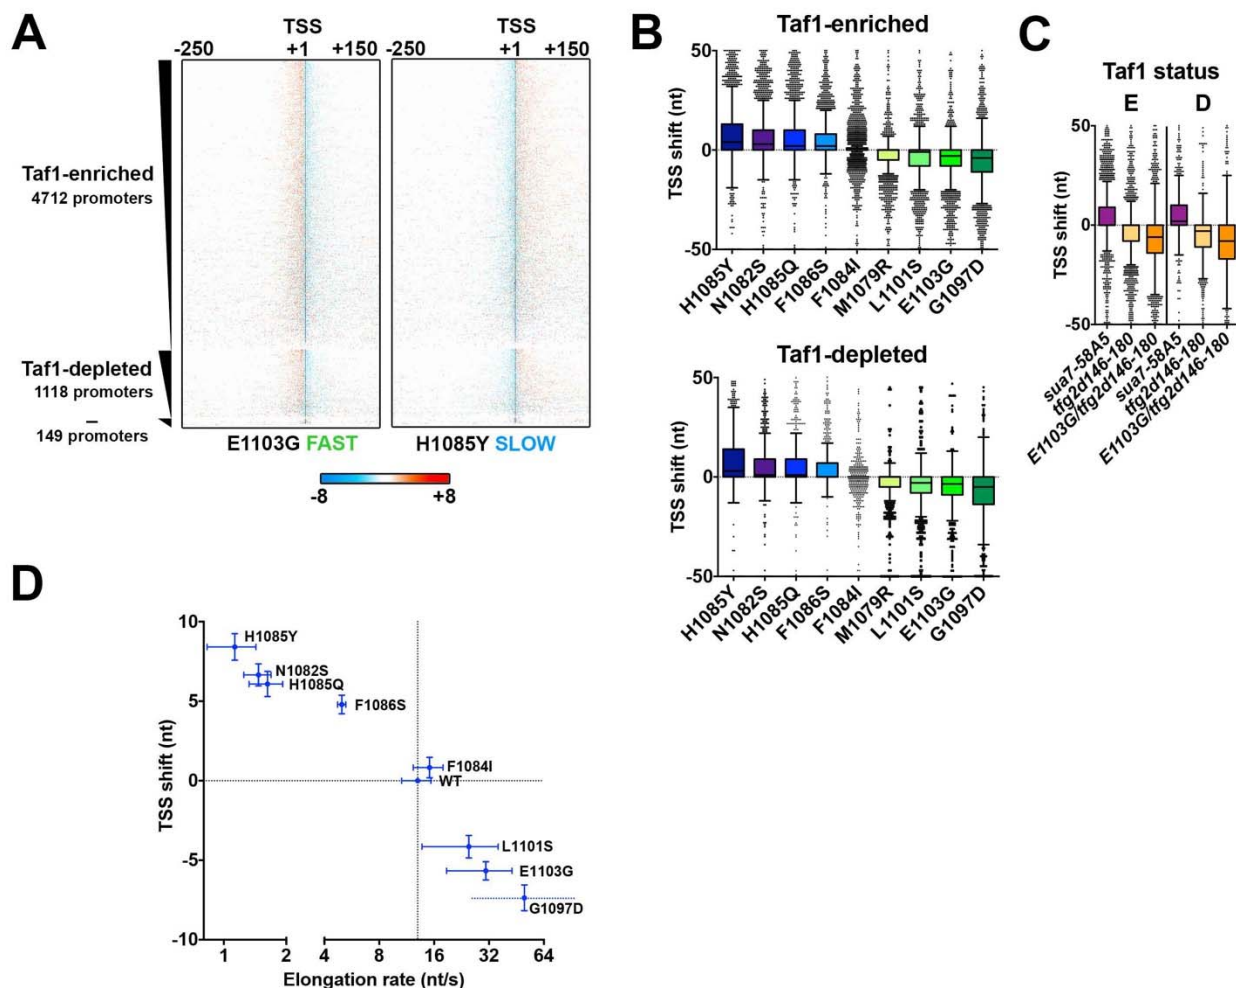

1446

1447 **Figure 2. Pol II and GTF mutants confer polar shifts in TSS-usage across all promoter**  
 1448 **classes in *S. cerevisiae*.** **A.** Heat maps show TSS distribution changes in a fast (E1103G) or a  
 1449 slow (H1085Y) Pol II mutant relative to WT. 401 nt promoter windows were anchored on  
 1450 measured median TSS position in our WT strain and TSS distributions in WT or mutant strains  
 1451 were normalized to 100%. Differences in distribution between WT and mutant TSS usage were  
 1452 determined by subtracting the normalized WT distribution from normalized mutant distributions.  
 1453 Promoters are separated into those classified as Taf1-enriched, Taf1-depleted, or neither and  
 1454 rank-ordered on the y-axis based on total reads in WT (from high to low). Gain in relative mutant  
 1455 TSS usage is positive while loss in relative mutant usage is negative. **B.** Significant polar shifts  
 1456 in TSS usage are apparent for examined *rpb1* mutants (except *rpb1* F1084I) across promoter  
 1457 classes. All box plots are Tukey plots unless otherwise noted (see Methods). Promoters  
 1458 examined are n=3494 (>200 reads total expression in WT). **C.** Significant polar shifts in TSS  
 1459 usage are apparent for examined GTF mutants and an *rpb1 tfg2* double mutant shows  
 1460 exacerbated TSS shifts relative to the single mutants (compare C to B). Promoters examined  
 1461 are as in (B). **D.** Average TSS shifts in Pol II *rpb1* mutants correlate with their measured in vitro  
 1462 elongation rates. Error bars on TSS shifts and elongation rates are bounds of the 95%  
 1463 confidence intervals of the means. Elongation rates are from (XXX). Mutants slower than WT in  
 1464 vitro exhibit downstream shifts in TSS distributions while mutants faster than WT in vitro exhibit  
 1465 upstream shifts in TSS distributions correlating with the strengths of their in vitro elongation rate  
 1466 defects and their in vivo growth rate defects. Promoters examined are as in (B,C).

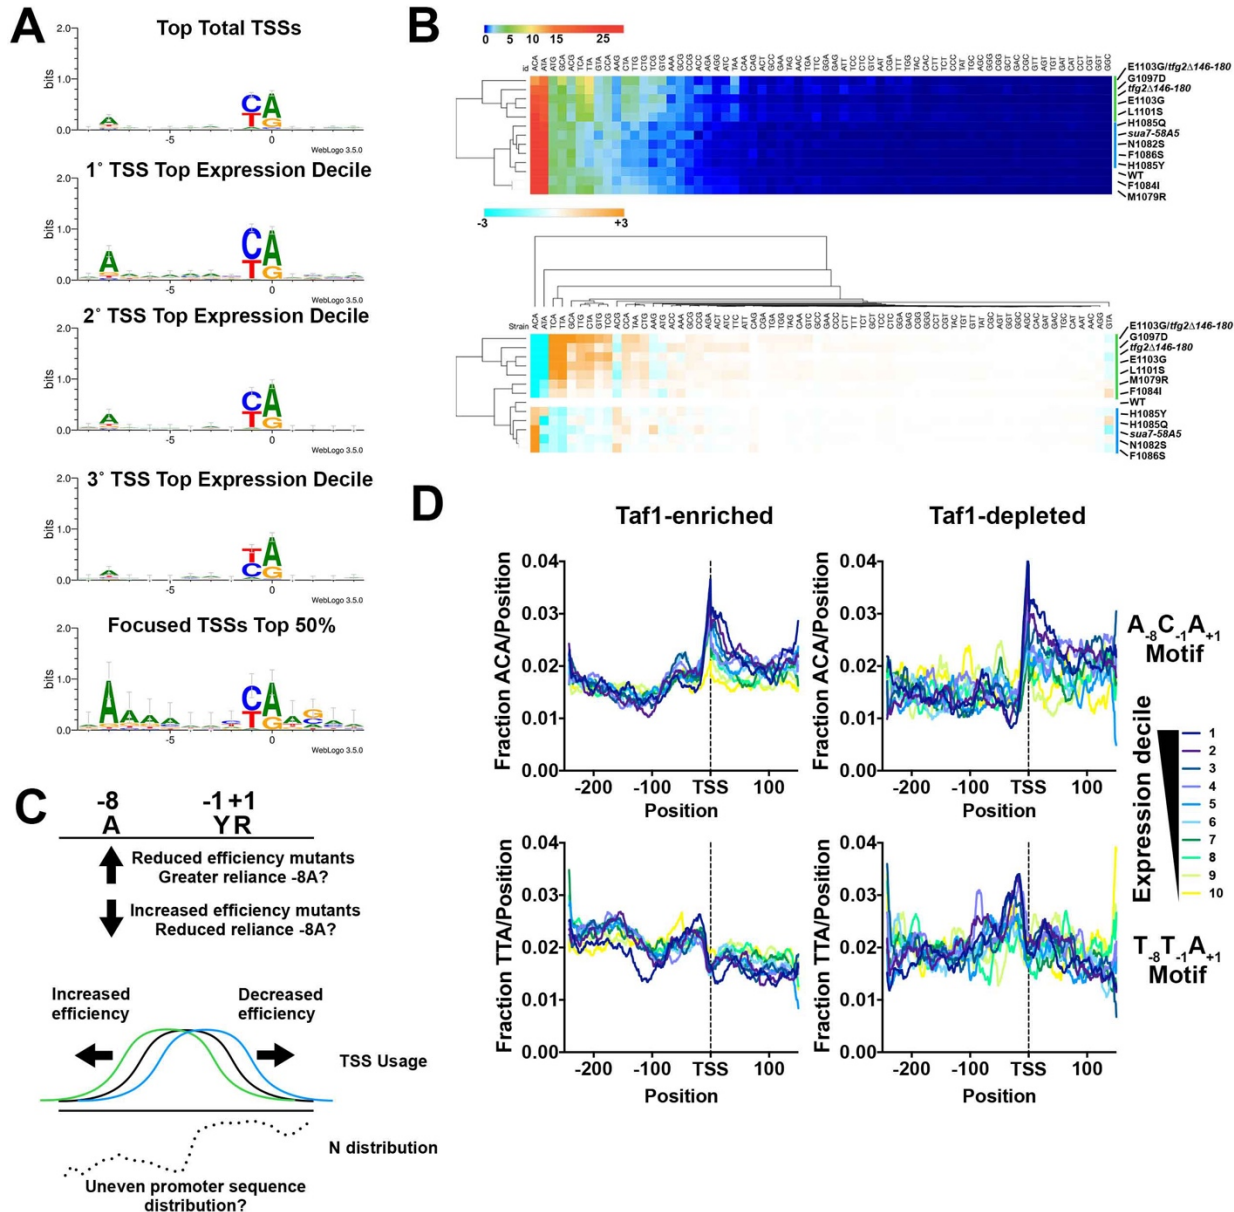

1467

1468 **Figure 3. TSS motif usage and alterations in TSS-usage affecting mutants.** **A.** Preferred Y-  
1469 1R+1 motif usage observed in our data as expected. *S. cerevisiae* selective enrichment of A at -  
1470 8 is apparent at the most highly used starts in promoters with higher expression (compare  
1471 primary/top (1°) TSSs with secondary (2°) or tertiary TSSs from promoters within the top decile  
1472 of expression). Promoters exhibiting very narrow TSS spreads (focused) show additional minor  
1473 enrichments for bases near the TSS. **B.** Overall TSS motif usage in WT and TSS-usage  
1474 affecting mutants. Motifs were separated by -8 -1 +1 identities (64 motifs) as the vast majority of  
1475 TSS reads derive from N<sub>-8</sub>Y<sub>-1</sub>R<sub>+1</sub> sequences. (Top) Percent motif usage determined for  
1476 individual strains and displayed in heat map hierarchically clustered on y-axis to group strains  
1477 with similar motif usage distribution. (Bottom) Difference heat map illustrating relative changes  
1478 in N<sub>-8</sub>Y<sub>-1</sub>R<sub>+1</sub> motif usage in heat map hierarchically clustered on y-axis to group strains with  
1479 similar motif usage difference distribution. **C.** Alteration in motif usage and apparent changes to  
1480 reliance on an A<sub>-8</sub> could arise from a number of possibilities. Alterations in TSS efficiencies in  
1481 mutants could result in upstream or downstream shifts in TSS distribution if mutants have



1482 decreased or increased reliance, respectively, on a particular motif. Conversely, alteration in  
1483 initiation efficiency in general (increase or decrease) could alter TSS motif usage if TSS motifs  
1484 are unevenly distributed across yeast promoters (example distribution for hypothetical motif *M*).  
1485 **D.** TSS motifs are unevenly distributed across yeast promoters and differentially enriched  
1486 correlating with steady state promoter expression levels. (Top) the apparent highest used  $A_{-8}Y_{-1}R_{+1}$   
1487 motif ( $A_{-8}C_{-1}A_{+1}$ ) and (bottom) the less preferred  $T_{-8}T_{-1}A_{+1}$  motif are compared for Taf1-  
1488 enriched or Taf1-depleted promoters.

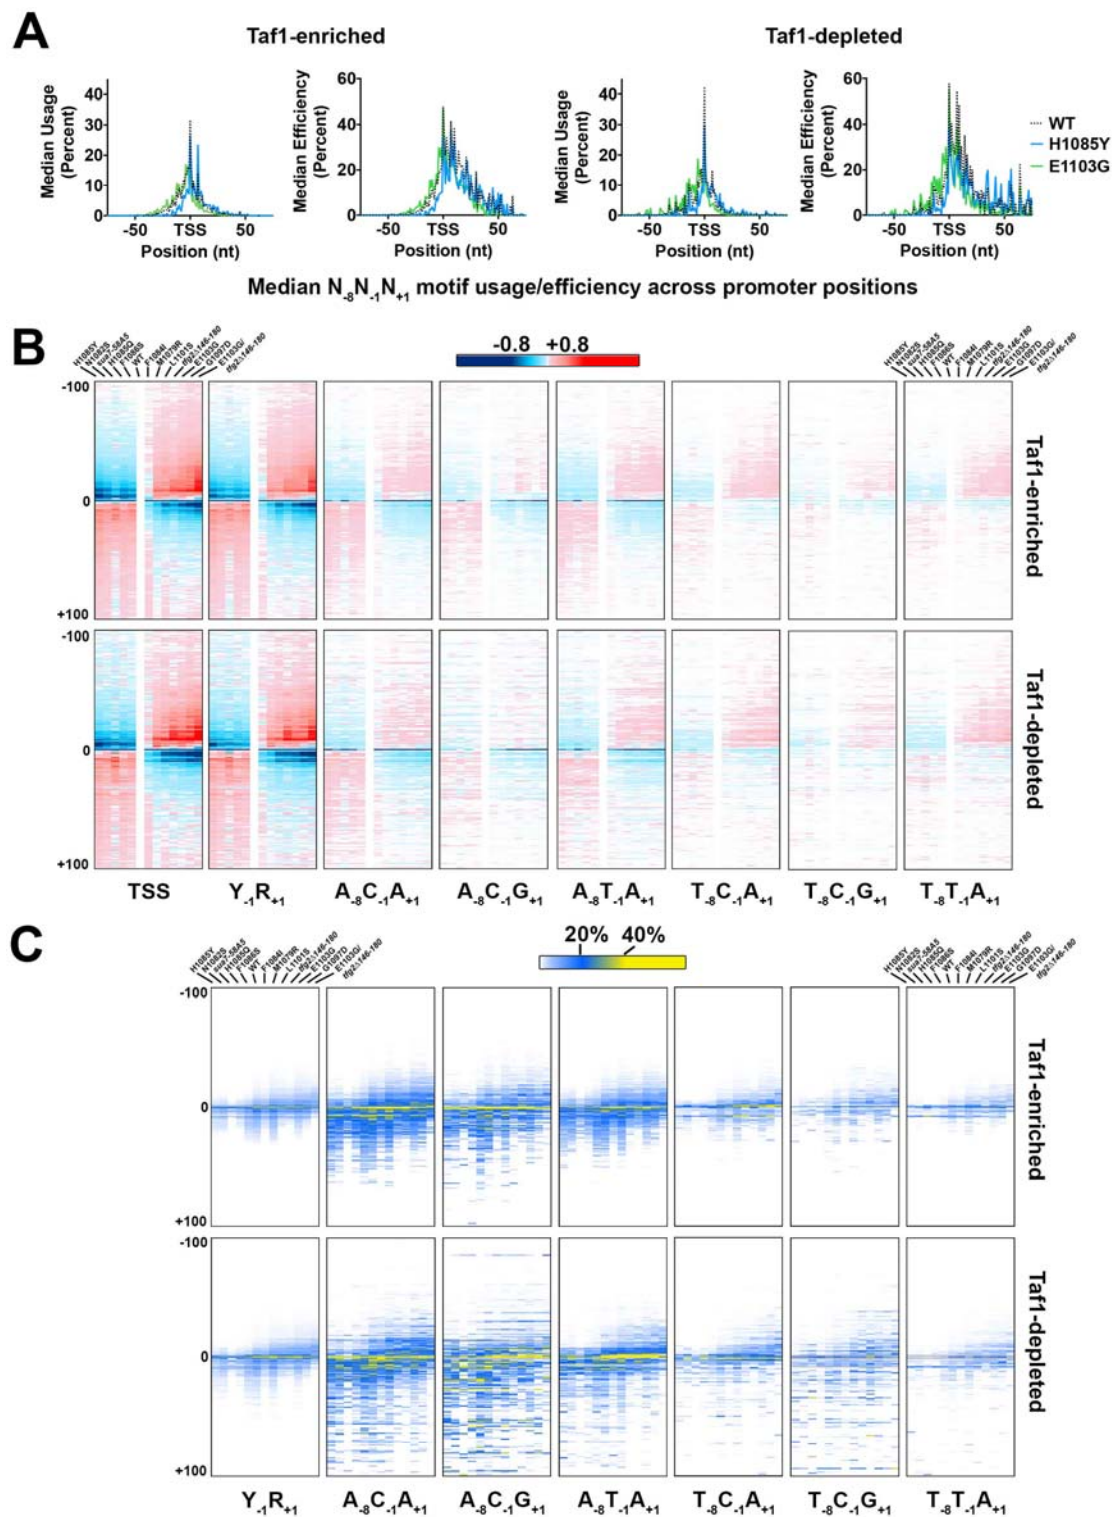

1489

1490 **Figure 4. TSS-usage mutants alter TSS usage efficiencies across TSS motifs consistent**  
 1491 **with promoter scanning initiation at all promoters. A. Median usage (left) or “efficiency”**

1492 (right) for  $A_{-8}C_{-1}A_{+1}$  sites across promoters in WT, *rpb1* E1103G, or *rpb1* H1085Y strains for  
1493 Taf1-enriched (left pair of graphs) or Taf1-depleted promoters (right pair of graphs). Usage is  
1494 defined as median percent reads found at any  $A_{-8}C_{-1}A_{+1}$  sites by promoter position relative to a  
1495 baseline position (the median TSS in WT). Efficiency is calculated from a model that assumes  
1496 promoter scanning from upstream to downstream positions and is defined as number of TSS-  
1497 seq reads mapping to a genome position divided by the sum of those reads and any  
1498 downstream reads within a defined promoter window. *rpb1* E1103G and *rpb1* H1085Y both shift  
1499 usage but alter efficiency differently. **B.** Altered usage across TSS motifs in TSS-usage affecting  
1500 mutants. Heat maps show difference in aggregate usage normalized to promoter number for  
1501 different  $N_{-8}Y_{-1}R_{+1}$  TSS motifs. Strains are ordered on the x-axis from left-to-right from strongest  
1502 downstream shifter to strongest upstream shifter. Promoter positions from -100 (upstream) to  
1503 +100 (downstream) flanking the median TSS position in WT regardless of promoter class, TSS-  
1504 usage affecting mutants cause polar effects on distribution of TSS usage when examining  
1505 motifs separately. **C.** Motif efficiency calculated as in (A) for a subset of  $N_{-8}Y_{-1}R_{+1}$  TSS motifs for  
1506 all mutants. Heat maps are ordered as in (B). Downstream shifting mutants in (B) generally  
1507 reduce TSS usage efficiencies across promoter positions. Upstream shifting mutants in (B)  
1508 generally shift TSS efficiencies upstream.

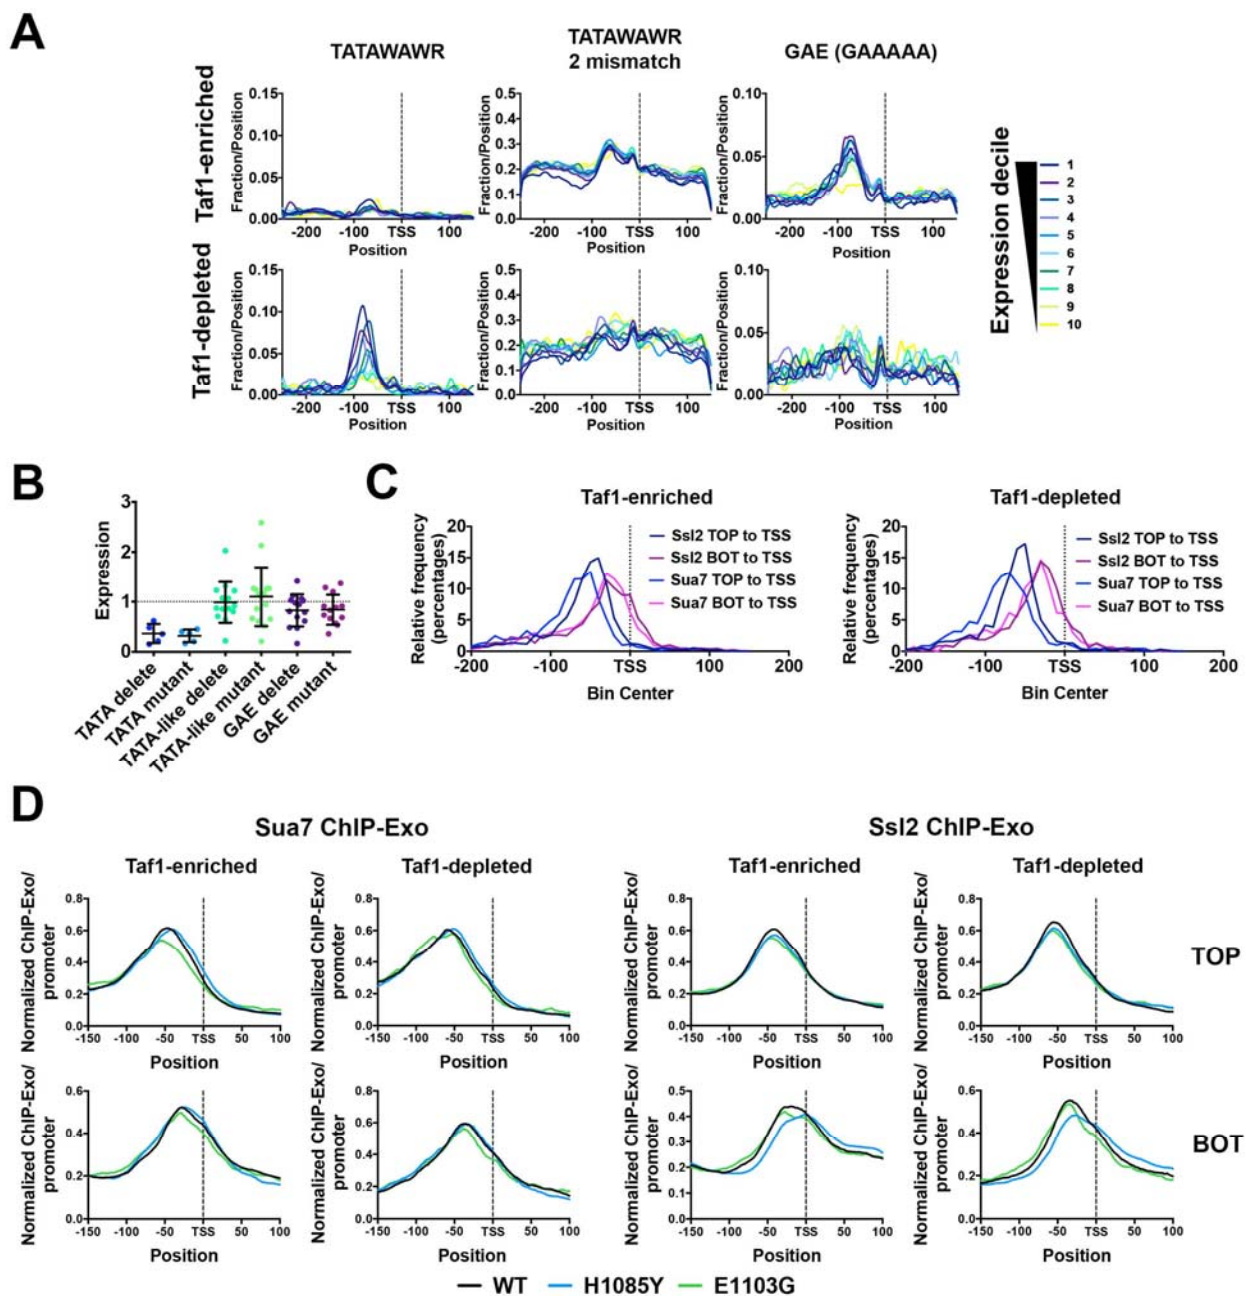

1509

1510 **Figure 5. Attributes of core promoter classes and PIC positioning in TSS-usage affecting**  
 1511 **mutants. A.** Enrichment by expression decile in WT of putative core promoter elements in Taf1-  
 1512 enriched and Taf1-depleted promoters. TATA consensus (TATAAWWR, W=A/T, R=A/G) is  
 1513 enriched in Taf1-depleted promoters while the GA-rich element (GAAAAA) is enriched in Taf1-  
 1514 enriched promoters. Yeast promoters are relatively AT-rich so there is a high probability of  
 1515 “TATA-like” elements differing from the TATA consensus by two mismatches. **B.** Tested GAE or  
 1516 TATA-like elements do not greatly contribute to expression from promoters where tested.  
 1517 Expression by Northern blotting for promoters or classes of promoter mutant fused to a reporter  
 1518 gene. Promoter mutants are normalized to the respective WT for each promoter. “Delete”  
 1519 mutants represent deletions of particular element types. “Mutant” elements represent elements  
 1520 where base composition has been altered. **C.** GTF positioning by promoter classes determined



1521 by ChiP-exo for Sua7 (TFIIB) or Ssl2 (TFIIH). For each promoter, the median position of ChiP-  
 1522 exo reads on the top (TOP) or bottom (BOT) DNA strand was used to estimate GTF positioning.  
 1523 Left graph shows histogram of estimated GTF positions for Taf1-enriched promoters while right  
 1524 graph shows histogram of estimated GTF positions for Taf1-depleted promoters. **D.** Pol II  
 1525 mutant effects on GTF positioning as detected by ChiP-exo for Sua7 (TFIIB) or Ssl2 (TFIIH).  
 1526 Aggregate ChiP-exo signal for Taf1-enriched or depleted promoters on top (TOP) or bottom  
 1527 (BOT) DNA strands in WT, *rbp1* H1085Y, or *rbp1* E1103G. Curves on graph indicate LOWESS  
 1528 smoothing of aggregate ChiP-exo reads for the top 50% of promoters determine by ChiP-exo  
 1529 reads in WT cells.

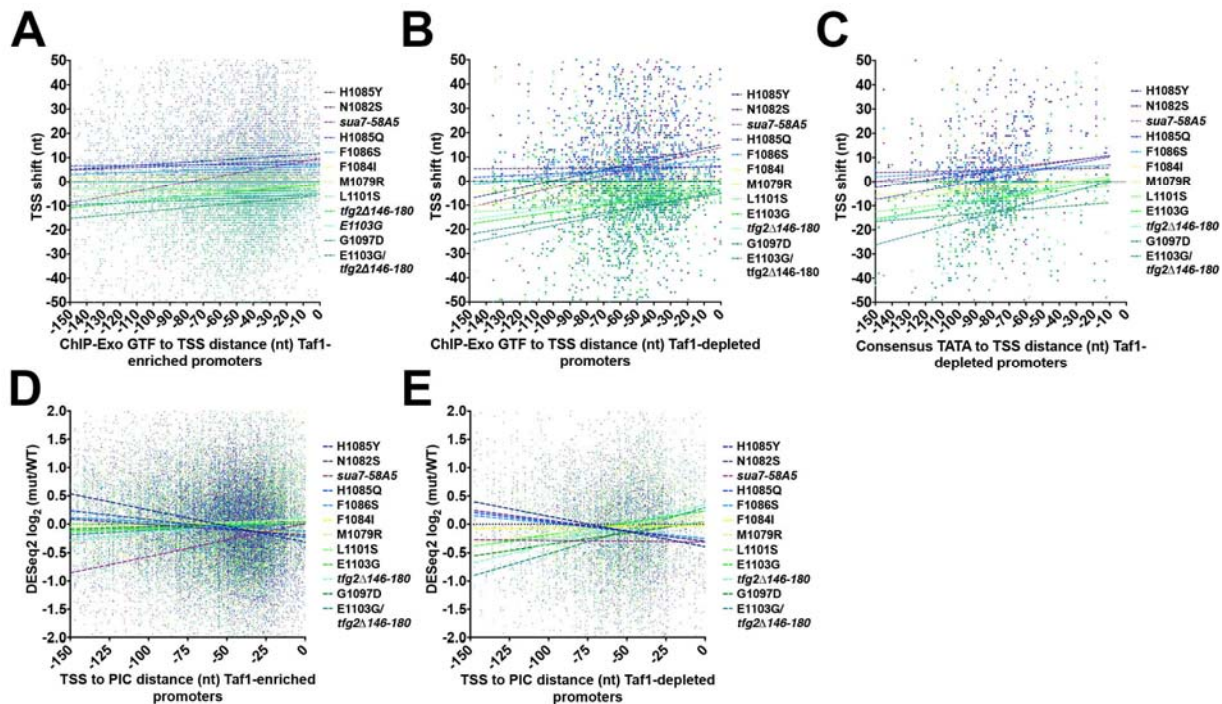

1530  
 1531 **Figure 6. Promoter architecture influences sensitivity to TSS-usage affecting mutants. A-  
 1532 C.** Distance of TSS to GTF position or core promoter position can correlate with extent of TSS  
 1533 shift in TSS mutants. Dashed lines are linear regression plots for TSS shift vs. GTF to TSS  
 1534 distance. GTF position determined by average of median ChiP-exo signal from top and bottom  
 1535 DNA strands for Sua7 and Ssl for **A.** Taf1-enriched promoters or **B.** Taf1-depleted promoters. **C.**  
 1536 Core promoter-TSS distance for Taf1-depleted TATA-element containing promoters correlates  
 1537 with extent of TSS shifts in TSS-usage affecting mutants. Dashed lines are linear regression  
 1538 plots for TSS shift vs. TATA-element to TSS distance for Taf1-depleted promoters with TATA  
 1539 elements. **D.** Correlation of differential expression ( $\log_2(\text{mutant/WT})$ ) with TSS to PIC distance  
 1540 for Taf1-enriched promoters. **E.** Correlation of differential expression ( $\log_2(\text{mutant/WT})$ ) with  
 1541 TSS to PIC distance for Taf1-depleted promoters.

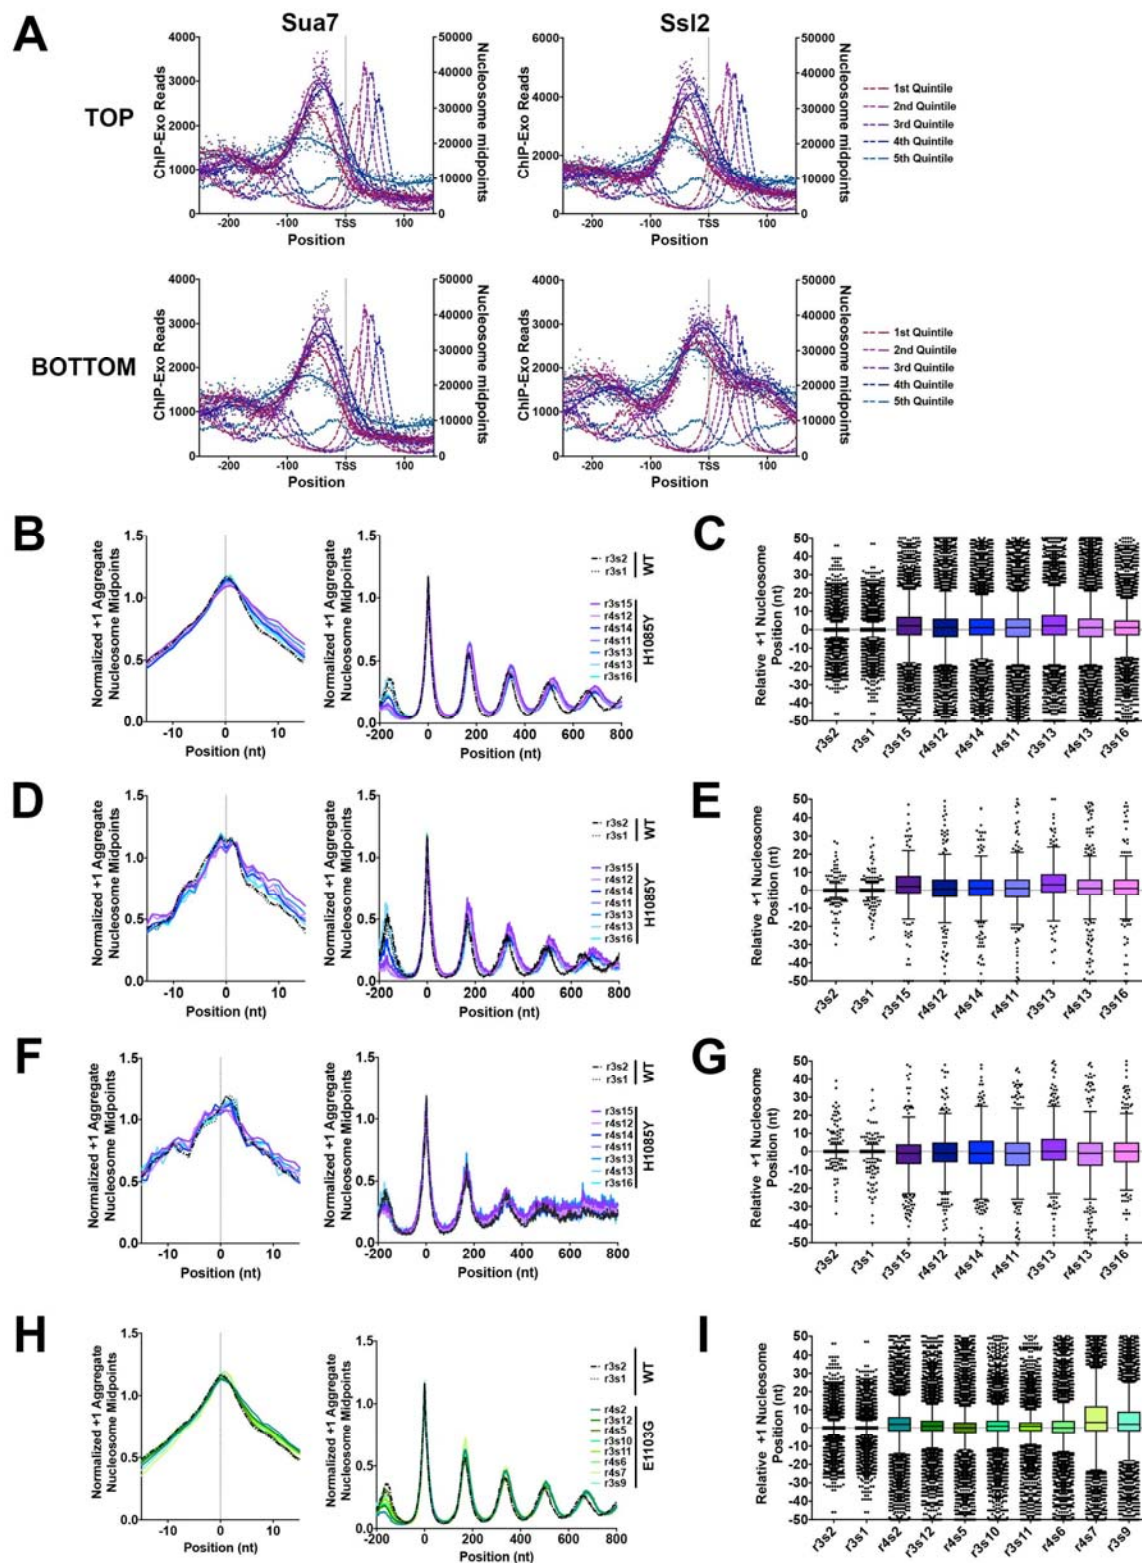

1542

1543

1544

**Figure 7. Relationship of promoter chromatin architecture to PIC position and effects of TSS-usage affecting mutants on nucleosome positioning. A. Nucleosome midpoints as**

1545 determined by MNase-seq (dashed lines) and GTF ChiP-exo signals for Taf1-enriched  
1546 promoters (solid line smooths of scatter plots) are aggregated by promoter quintiles  
1547 determined by TSS+1 nucleosome midpoint position. Nucleosome midpoints are from WT  
1548 strain and the same data are shown as reference for each ChiP-exo plot. First to fifth quintiles  
1549 are promoters with the closest +1 nucleosome to furthest, respectively. Fifth quintile promoters  
1550 likely have a weak +1 nucleosome and thus the determined +1 nucleosome is in some cases  
1551 like the +2. ChiP-exo aggregate data shows correlation with +1 nucleosome-TSS distance. **B.**  
1552 Nucleosome positioning in WT and H1085Y for Taf1-enriched promoters aligned by +1  
1553 nucleosome in WT (left), over genes (-200 to +800 from +1 nucleosome position, right). **C.**  
1554 Determined +1 nucleosome position for WT and H1085Y Taf1-enriched promoters for individual  
1555 MNase-seq libraries relative to position determined by averaging the four WT libraries. Box plots  
1556 are Tukey plots (see Methods). **D. and E.** Nucleosome positioning analyses as in B, C for top  
1557 expression decile Taf1-enriched promoters for WT and H1085Y. **F. and G.** Nucleosome  
1558 positioning analyses as in B, C for bottom expression decile Taf1-enriched promoters for WT  
1559 and *rpb1* H1085Y. **H. and I.** Nucleosome positioning analyses as in B, C for Taf1-enriched  
1560 promoters for *rpb1* E1103G. WT data from B, C shown as reference.

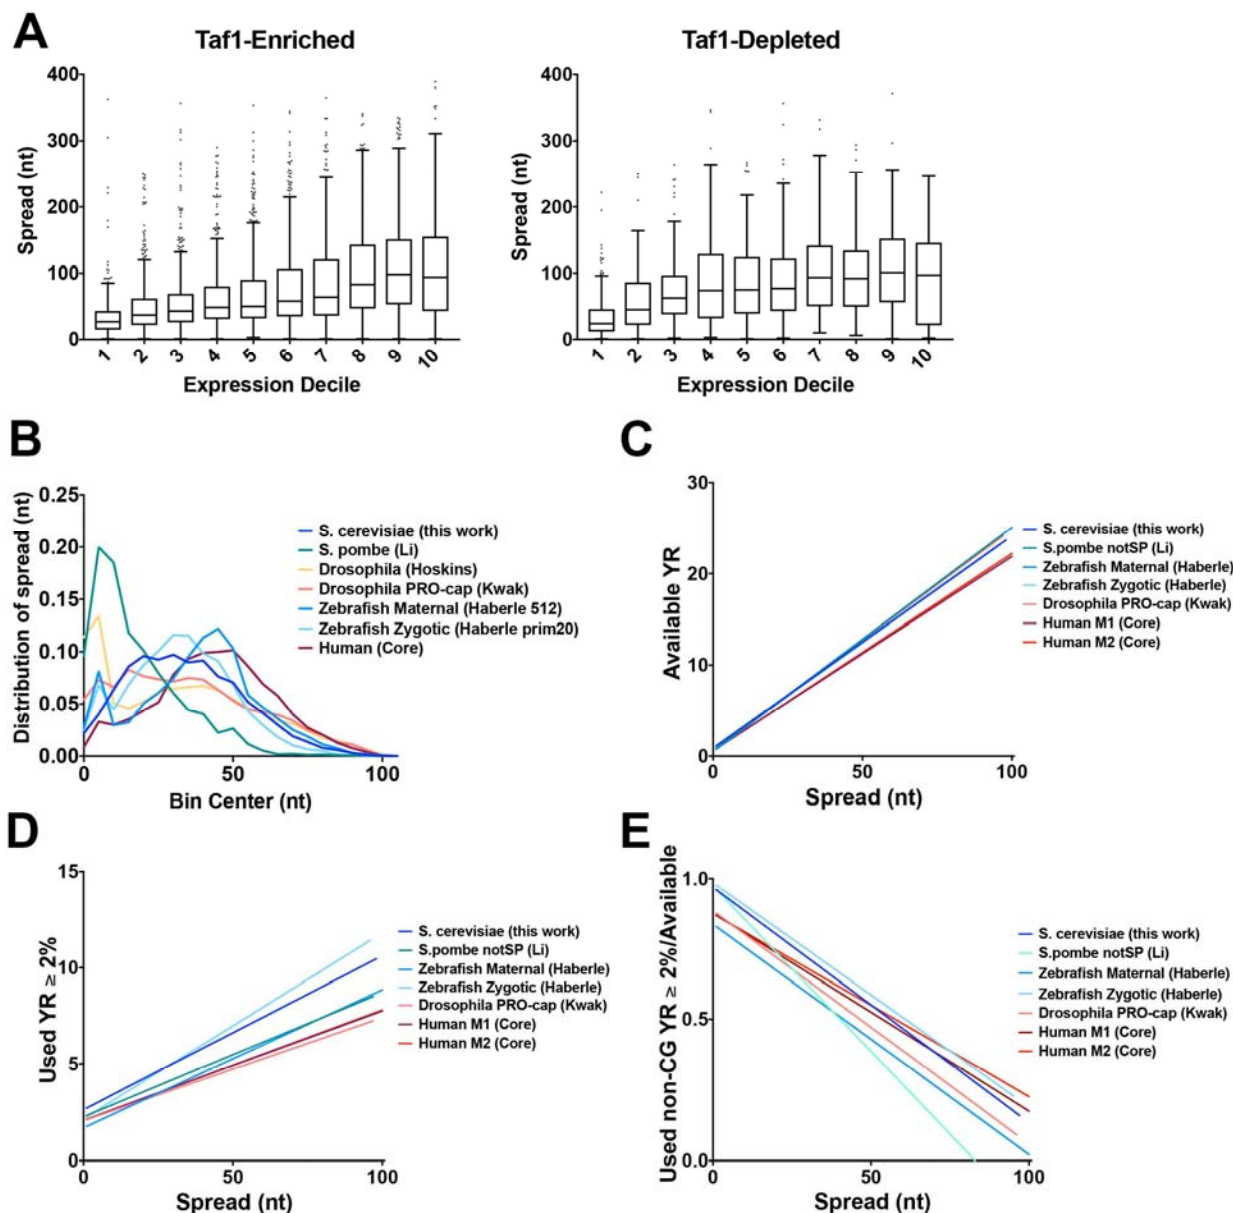

1561  
 1562 **Figure 8. TSS distribution characteristics for select eukaryotes. A.** TSS spread (distance  
 1563 defining positions of 10%-90% percentile of the TSS distribution) plotted for Taf1-enriched (left)  
 1564 or depleted (right) promoters separated by expression decile for WT yeast. Spread determined  
 1565 here for 401 nt promoter windows. **B.** Distribution of promoter “widths” (TSS spread) for TSS-  
 1566 seq for 101 nt promoter windows across a number of eukaryotic TSS-seq or related  
 1567 methodologies, including *S. cerevisiae* (WT data from this work), *S. pombe* (Li *et al*), *D.*  
 1568 *melanogaster* (Hoskins *et al* CAGE or Kwak *et al* PRO-cap), *Danio rerio* Zebrafish Maternal  
 1569 promoters (512 stage) or Zygotic (prim20) (Haberle *et al*), or Human PRO-cap data (Core *et al*).  
 1570 **C.** Number of available YR dinucleotides within spread regions for promoters in (B) with the  
 1571 following alterations. *S. pombe* promoter class limited to “notSP” (not single TSS promoters) as  
 1572 defined by Li *et al*. M1 and M2 classes for human data as defined by Core *et al* are separated.  
 1573 Hoskins *et al* CAGE data were not analyzed due to CAGE artifact potential for adding an extra  
 1574 untemplated C during reverse transcription of RNA 5' ends. **D.** Number of Y<sub>-1</sub>R<sub>+1</sub> dinucleotides



1575 used at  $\geq 2\%$  of total reads for promoter region vs. spread width for promoters in (C). Fraction of  
1576 non-CpG  $Y_1R_{+1}$  dinucleotides used at  $\geq 2\%$  of total reads for a promoter region relative to  
1577 available non-CpG  $Y_1R_{+1}$  dinucleotides vs spread width for promoters in (C).

## 1578 SUPPLEMENTAL FIGURES AND LEGENDS

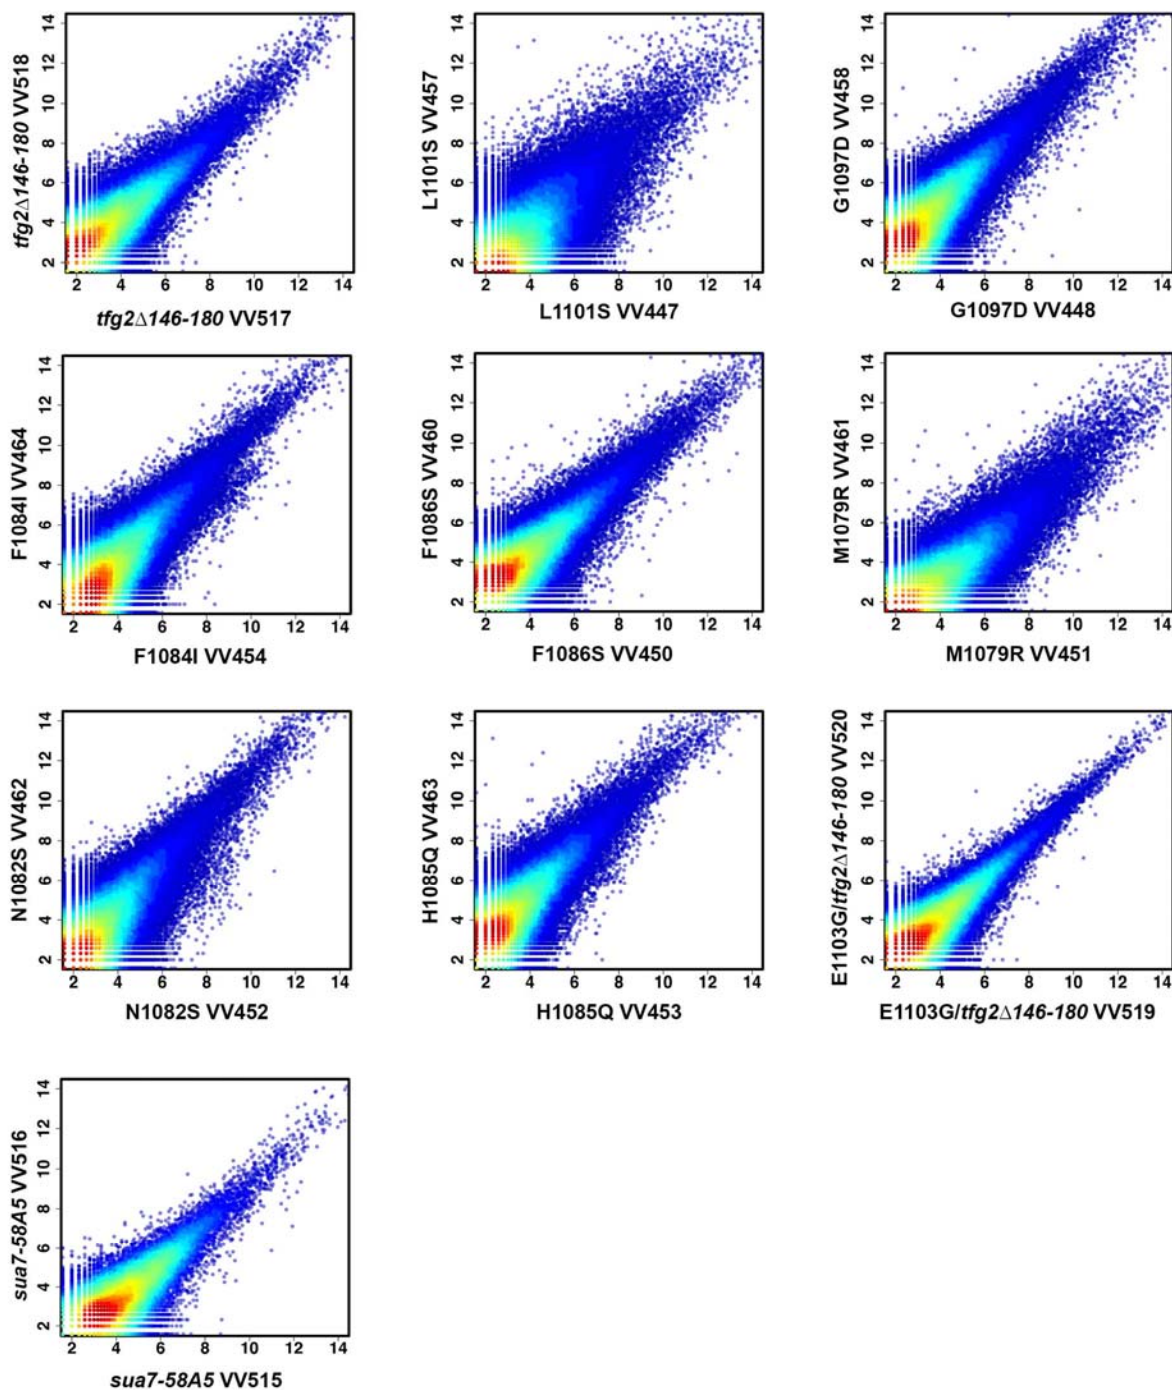

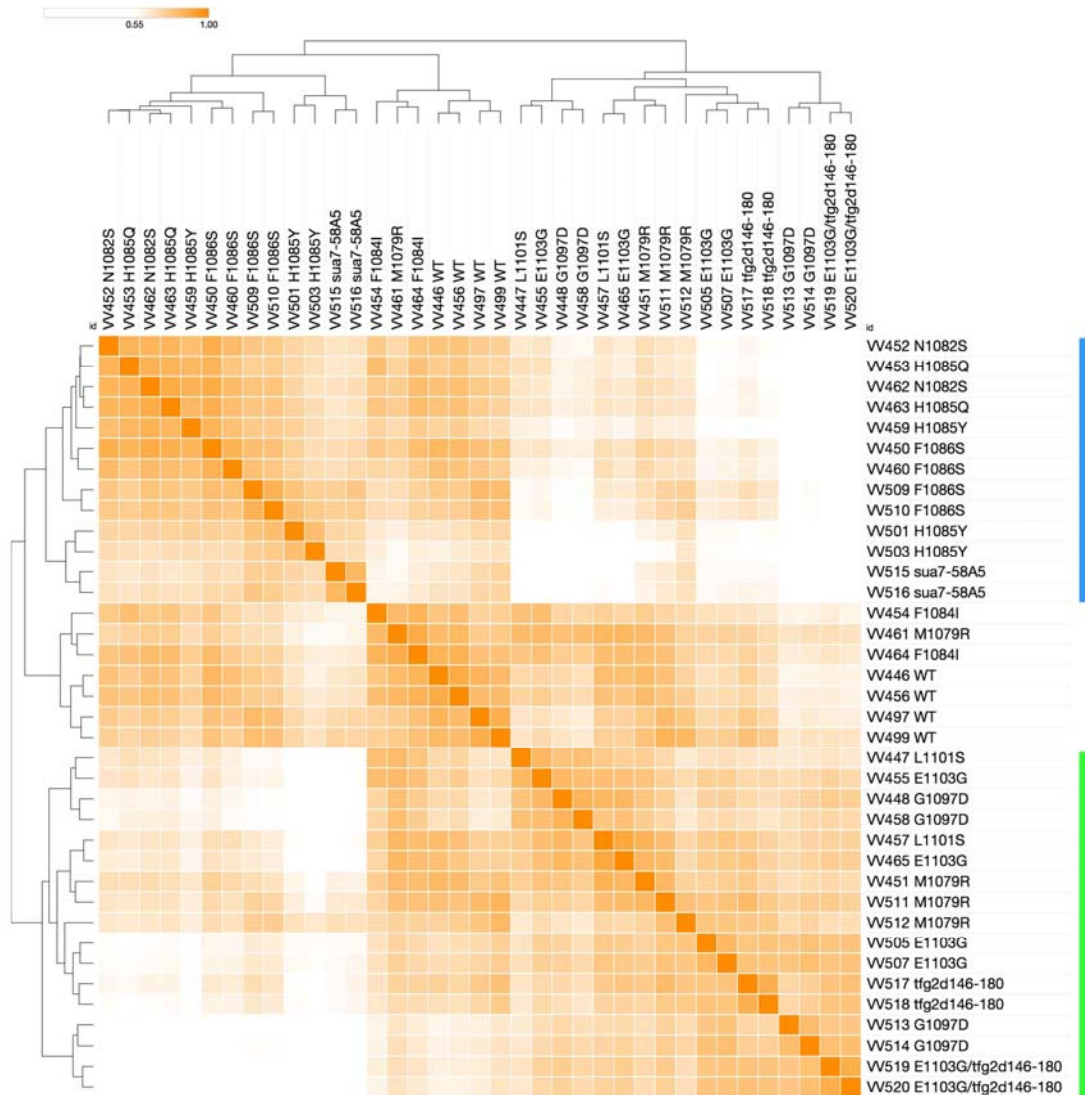

1582

1583 **Supplemental Figure 2. Correlation matrix for individual TSS-seq libraries for genome**  
1584 **positions within promoter windows.** Pearson r correlation coefficients for all TSS-seq library  
1585 comparisons displayed in a hierarchically clustered heat map. Promoter windows in this analysis  
1586 were defined by Rhee and Pugh predicted 8-mer TATA or TATA-like core promoter element  
1587 position +/- 200 nucleotides upstream and downstream. Libraries W446-465 represent one  
1588 batch of libraries and W497-520 represent a separate batch. Clustering distinguishes two major  
1589 classes of TSS-seq libraries correlating with upstream TSS-shifting and downstream TSS-  
1590 shifting.

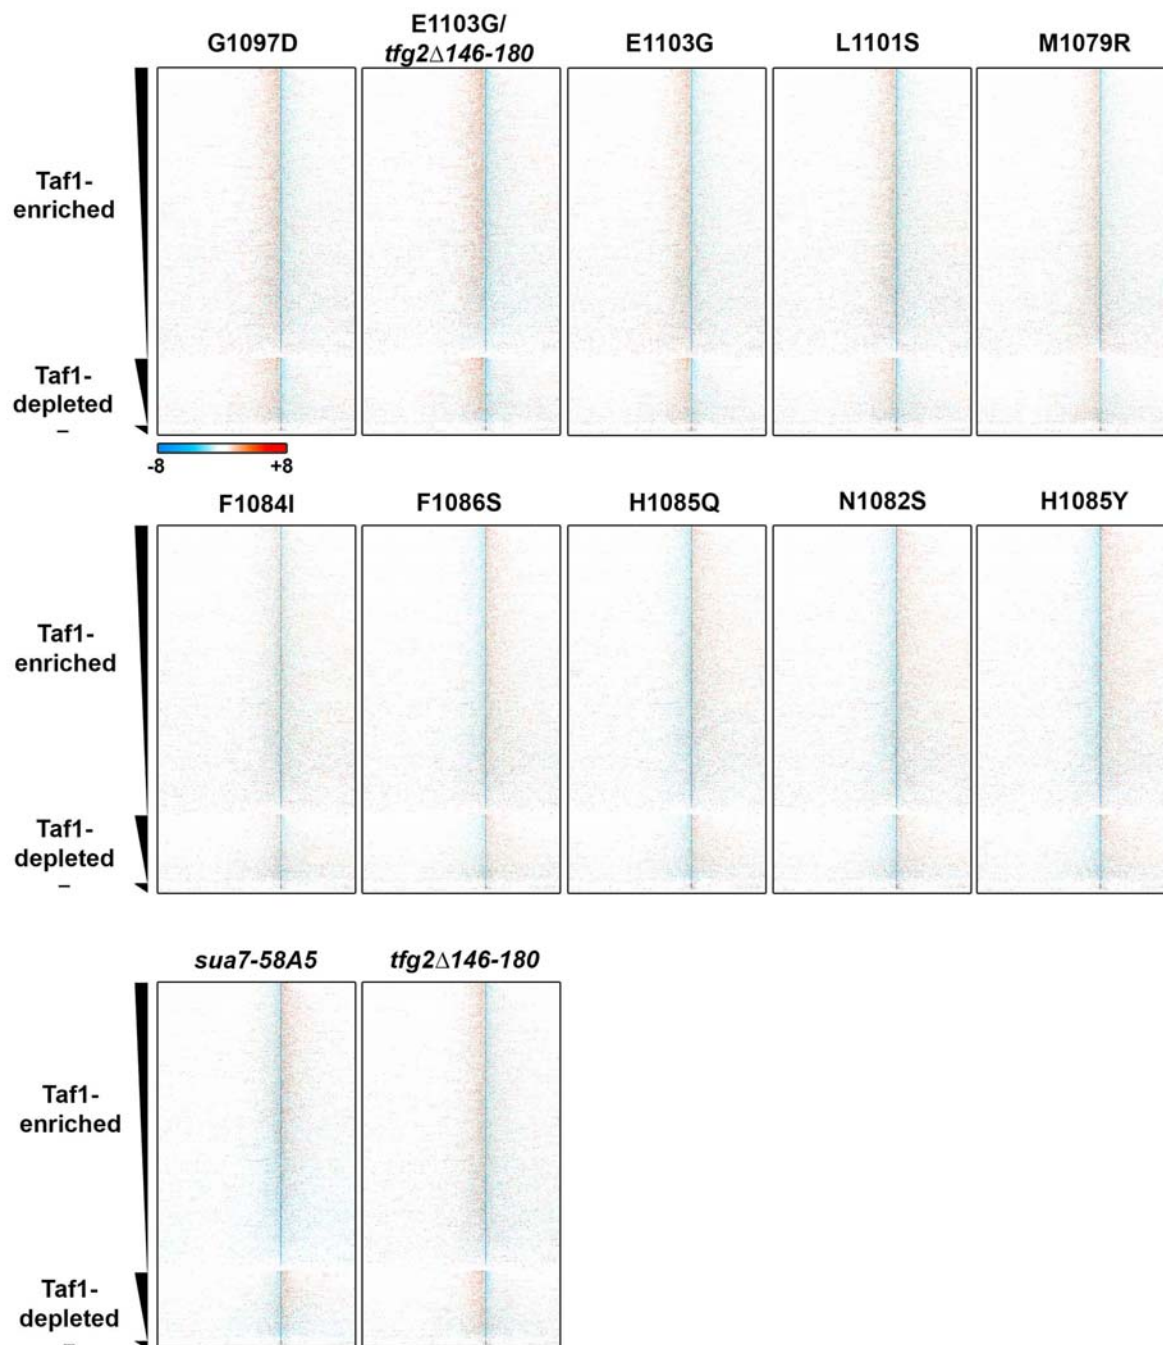

1591  
1592 **Supplemental Figure 3. Polar effects on TSS distributions observed for majority of TSS-**  
1593 **usage affecting mutants genome wide.** Heat maps as in Figure 2A. H1085Y and E1103G  
1594 maps from Figure 2A shown here for comparison with all other heat maps. Maps are arranged  
1595 from strongly upstream shifting to strongly downstream shifting (top left to middle right).  
1596 Downstream shifting *sua7-58A5* and upstream shifting *tfg2Δ146-180* GTF mutants are shown in  
1597 bottom row.

1598



**A**

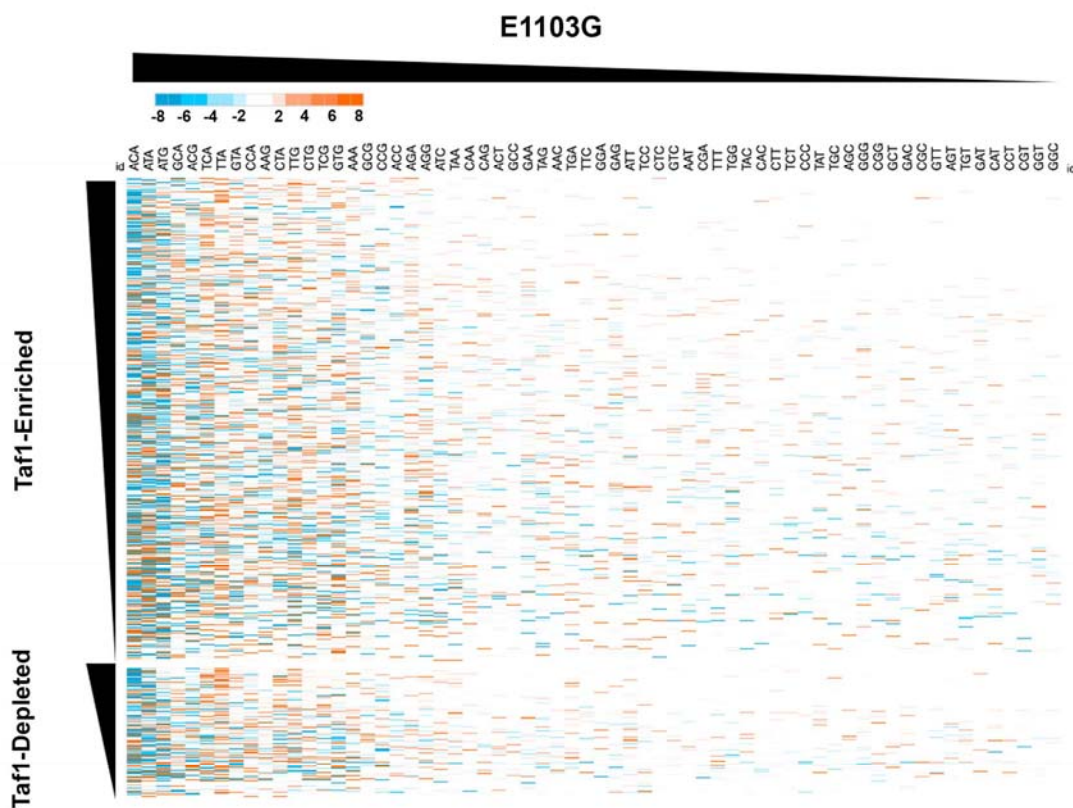

**B**

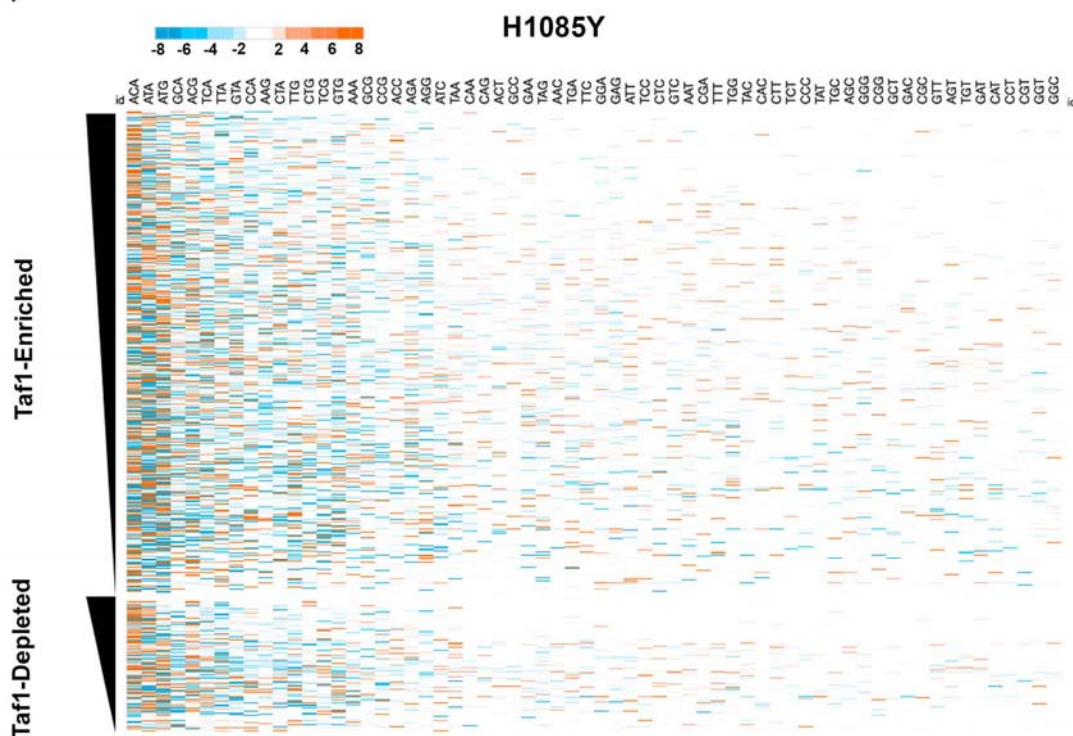



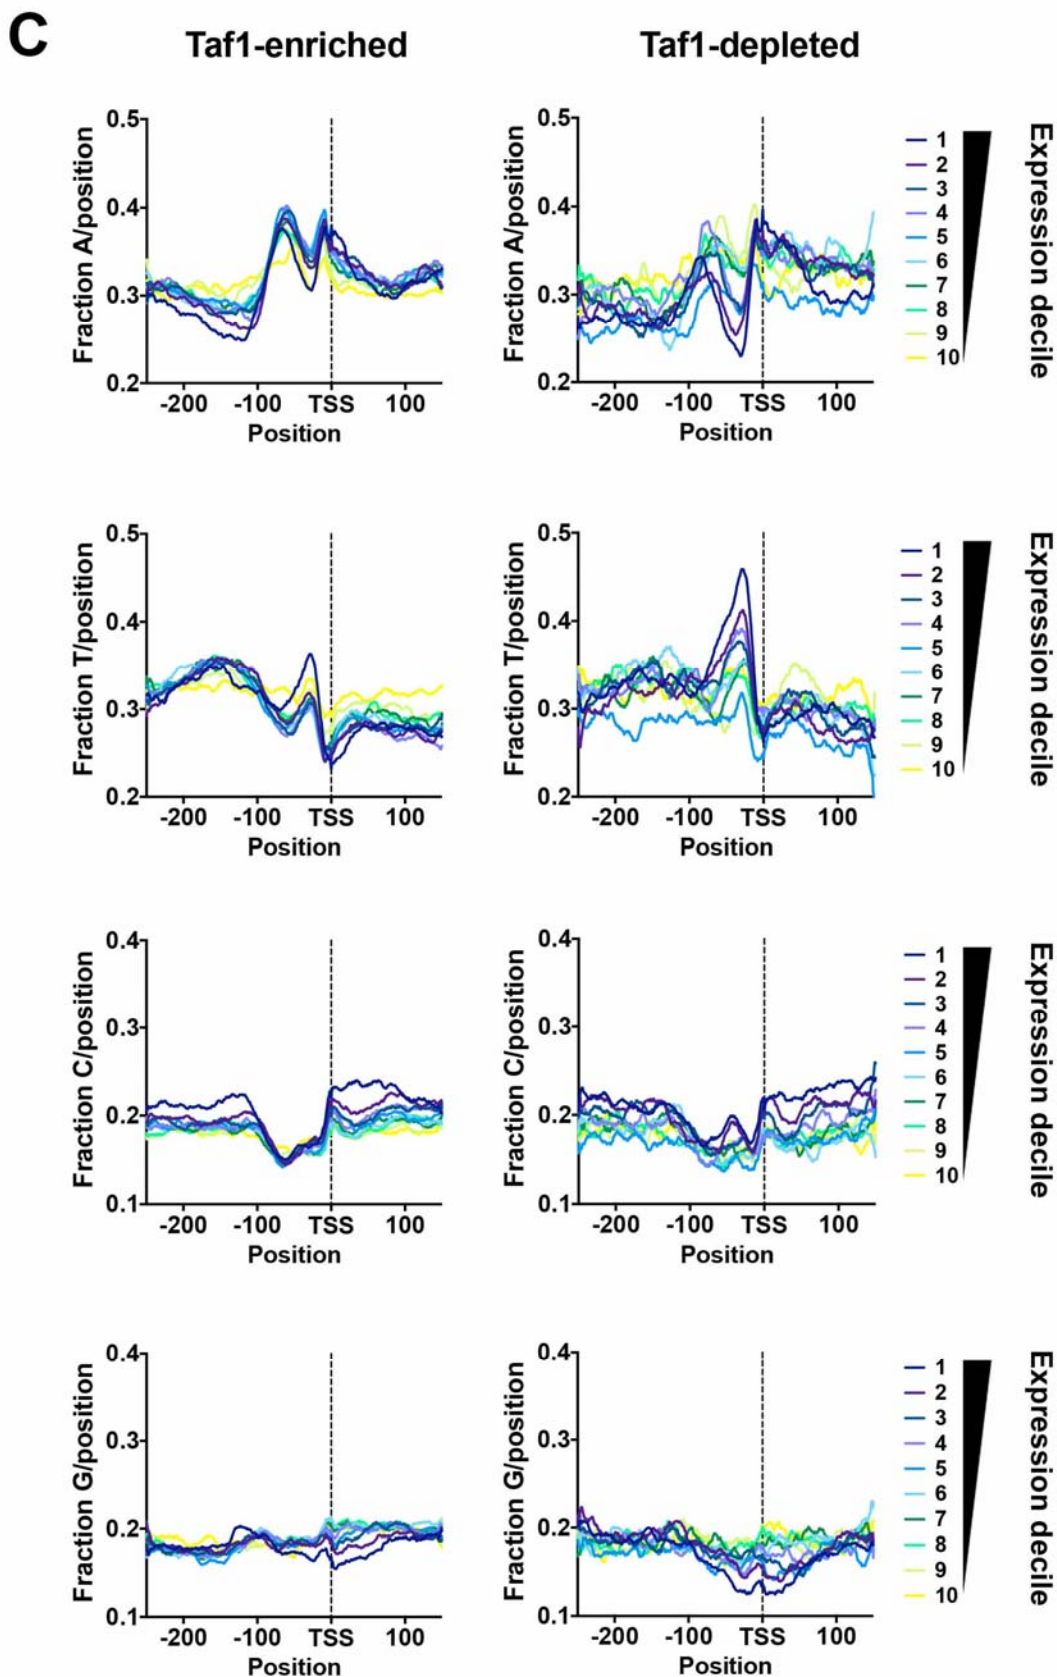

1601 **Supplemental Figure 4. Effects of *rpb1* H1085Y and *rpb1* E1103G mutants on TSS motif**  
 1602 **usage for  $N_8Y_1R_{+1}$  motifs at the individual promoter level. A and B.** Heat maps illustrating  
 1603 differences in percent motif usage for individual promoters (y-axis) for the 64  $N_8Y_1R_{+1}$  motifs (x-  
 1604 axis) in *rpb1* E1103G (A) or *rpb1* H1085Y (B) are shown. Motifs are rank ordered based on  
 1605 overall usage across genome in WT yeast (high to low from left to right) and promoters are  
 1606 separated into Taf1-enriched and Taf1-depleted classes and rank ordered within class by  
 1607 expression (high to low from top to bottom). C. Distribution of bases on the top promoter strand  
 1608 for Taf1-enriched or depleted promoters, separated by expression decile in WT cells.

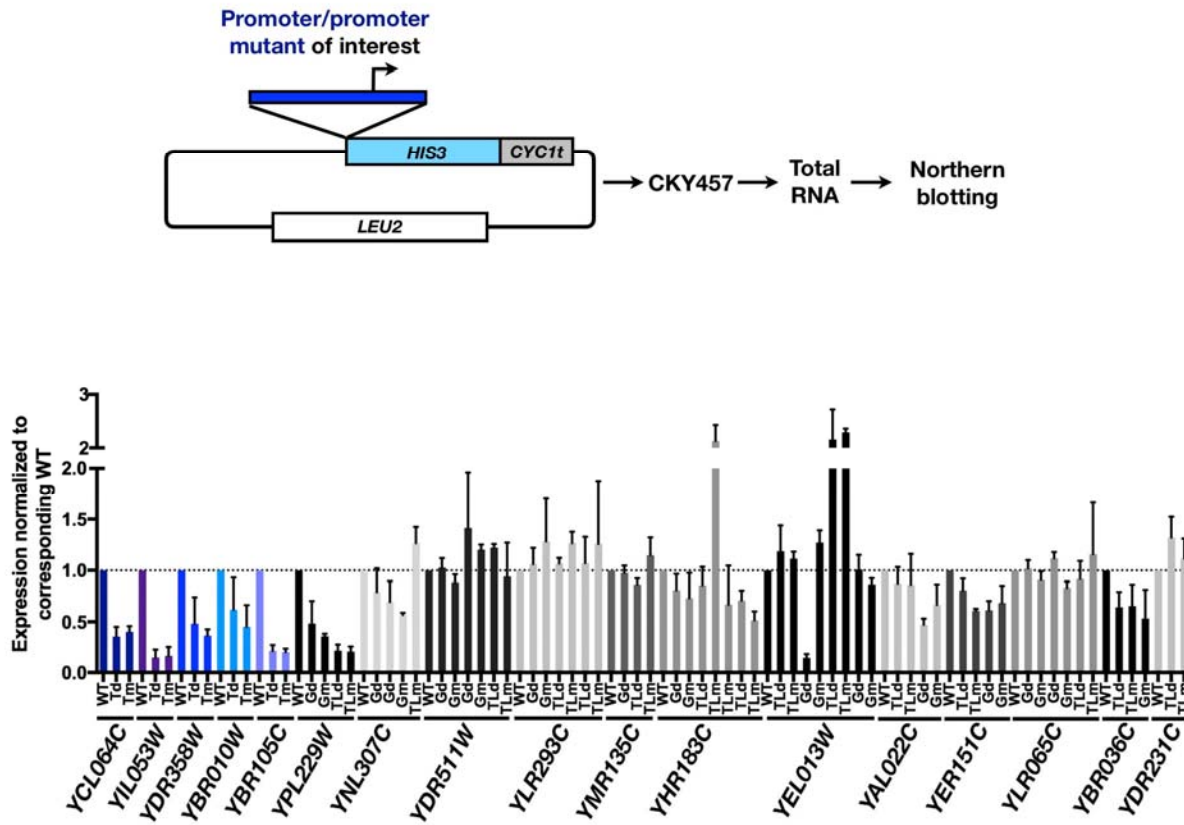

1609  
 1610 **Supplemental Figure 5. Effects on expression level of putative core promoter element**  
 1611 **mutations.** (Top) Schematic of reporter plasmids fusing promoters of interest (up to ATG) to a  
 1612 *HIS3* ORF/*CYC1* terminator reporter. (Bottom) Quantification of Northern blotting for control WT  
 1613 or promoters mutated (Tm) or deleted (Td) for consensus TATA elements (promoters shaded in  
 1614 blue), mutated or deleted for GAE (Gm or Gd, respectively) or mutated or deleted for TATA-like  
 1615 elements identified by Rhee and Pugh or our own analyses (TLM, TLd, respectively). Bars are  
 1616 mean +/- standard deviation of the mean (n>=3).

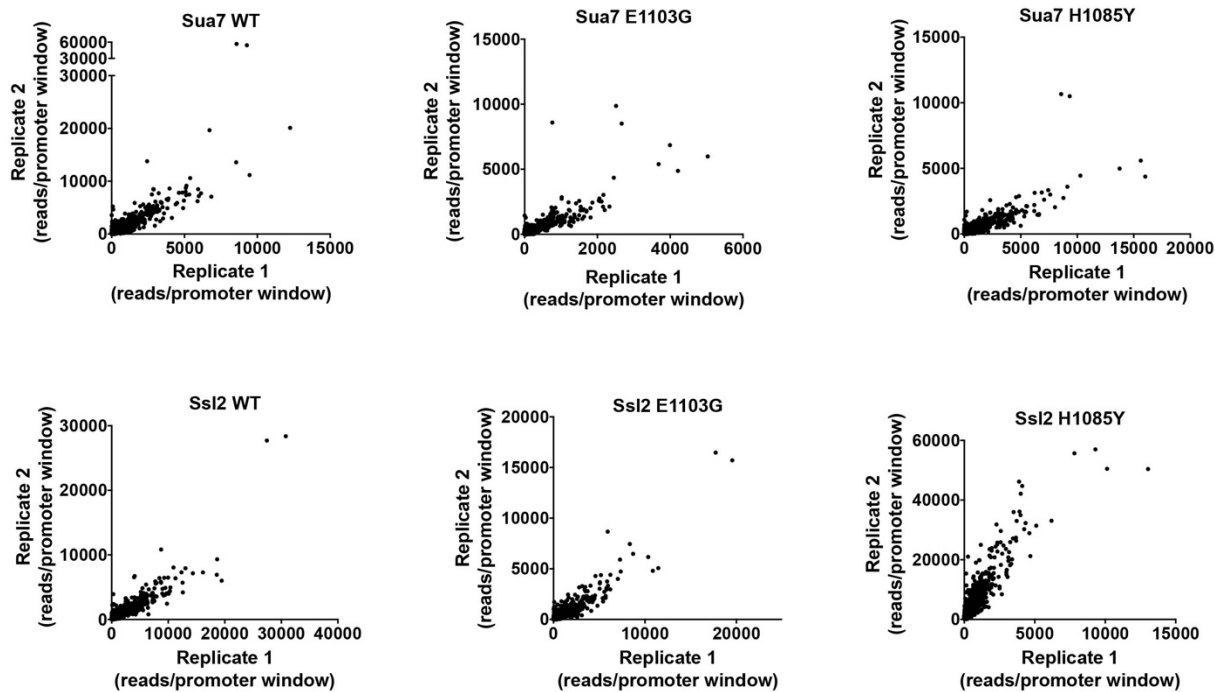

1617

1618 **Supplemental Figure 6. Correlation between ChIP-exo replicates.** Promoter-mapped ChIP-  
1619 exo tags compared for two biological replicates for WT, *rpb1* E1103G, and *rpb1* H1085Y in  
1620 Ssl2-TAP and Sua7-TAP strains.

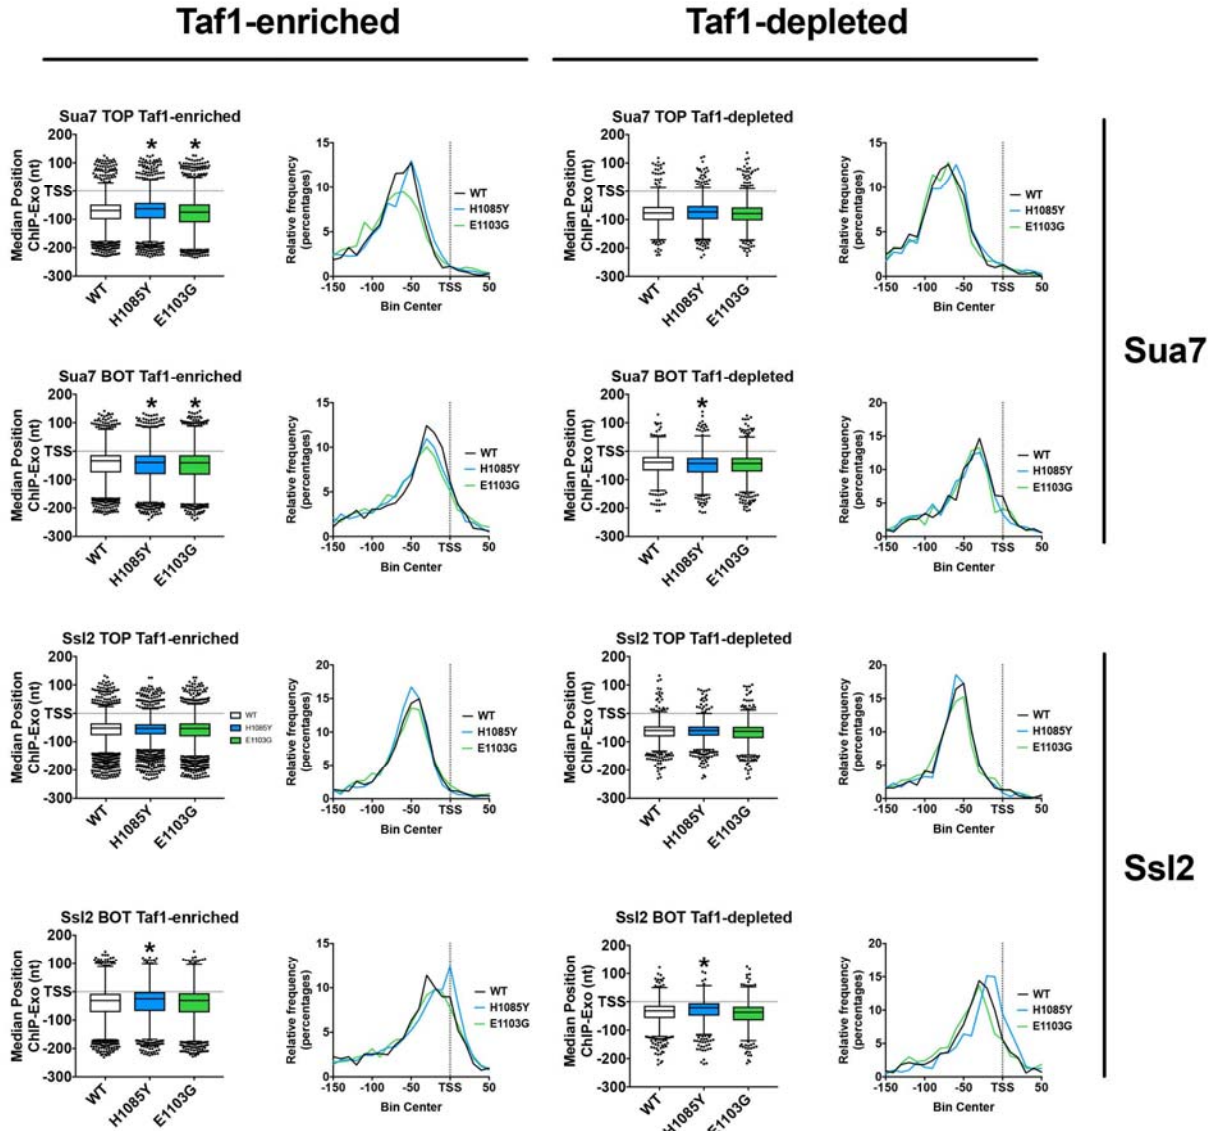

1621

1622 **Supplemental Figure 7. GTF positioning in *rpb1* H1085Y and *rpb1* E1103G mutants as**  
 1623 **determined by ChiP-exo.** Graphs show determined median position of ChiP-exo sequencing  
 1624 reads for top (TOP) or bottom (BOT) DNA strands for Sua7 (TFIIB) or Ssl2 (TFIIH) in Taf1-  
 1625 enriched promoters (left two columns) or Taf1-depleted promoters (right two columns) for WT,  
 1626 *rpb1* H1085Y, or *rpb1* E1103G strains. Promoters analyzed represent the top 50% of promoters  
 1627 as determined by ChiP-exo reads for **XXX** in WT cells. Box plots indicate distribution of  
 1628 determined positions relative to median TSS position (negative values indicate upstream  
 1629 positioning). Box plots are Tukey plots (see Methods). Asterisks indicate  $p \leq 0.05$  as determined  
 1630 by Kruskal-Wallis test with Dunn's correction for multiple comparisons in Graphpad Prism 7.0e.  
 1631 Line graphs indicate histogram of ChiP-exo position determinations in WT, *rpb1* H1085Y, or  
 1632 *rpb1* E1103G strains (derived from data illustrated in box plot to left of each histogram).



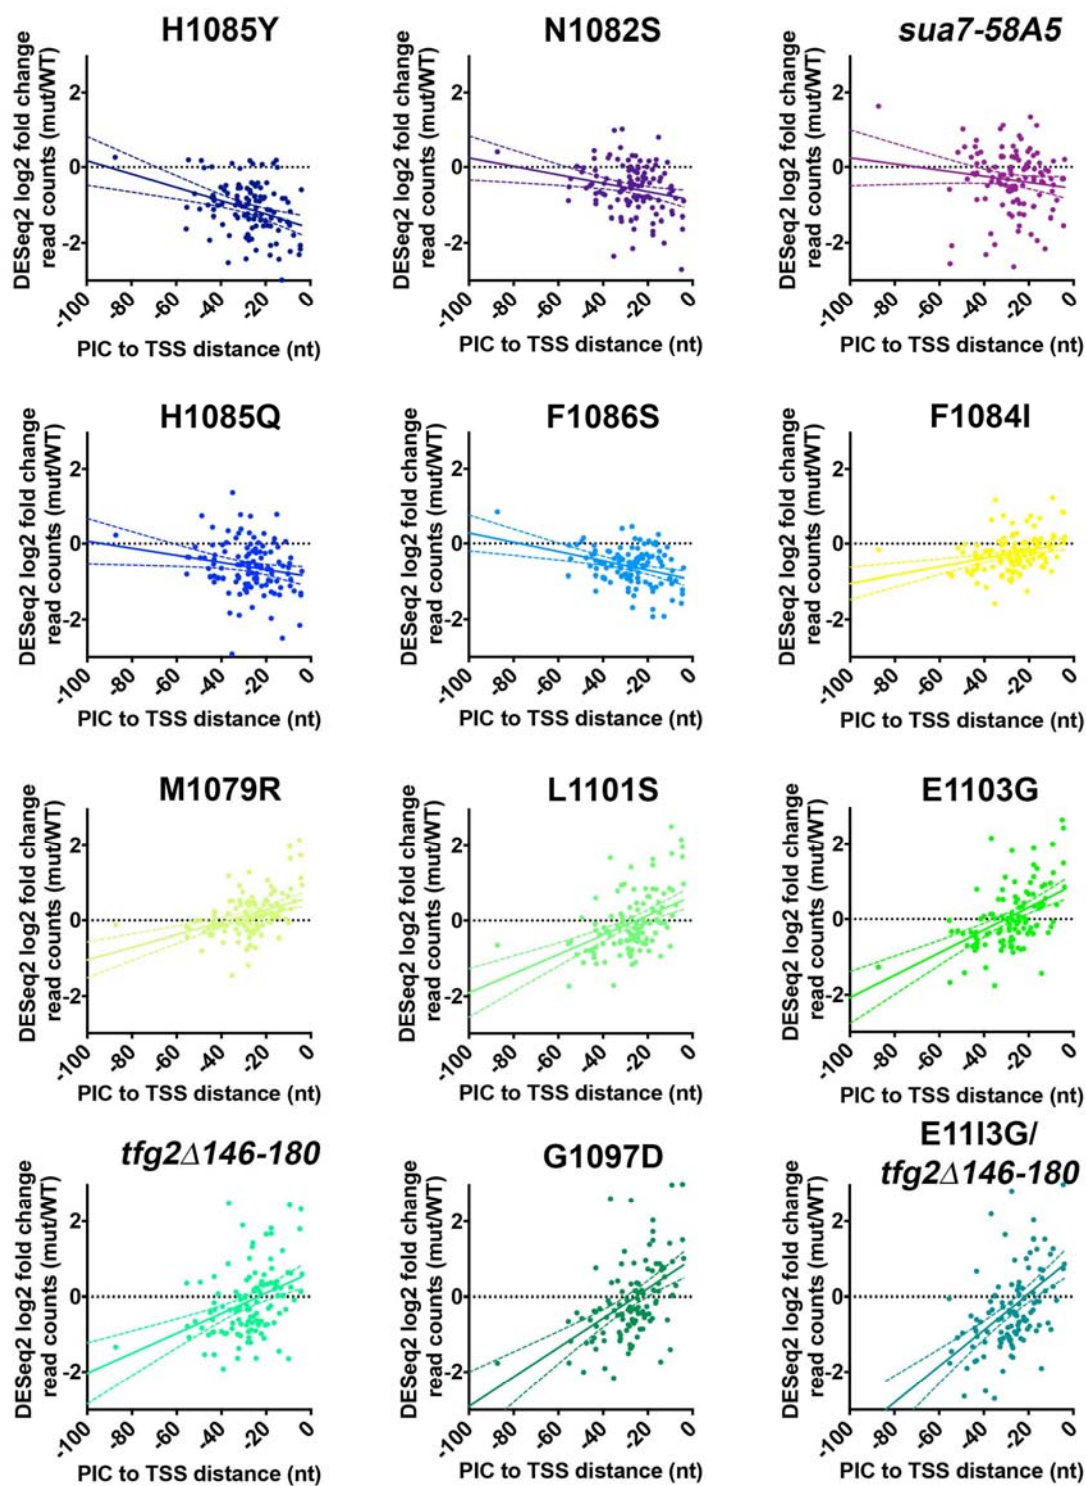

1633

1634

1635

**Supplemental Figure 8. Correlation of apparent expression changes for ribosomal protein (RP) genes with PIC to TSS distance.** PIC to TSS distance determined as in Figure 6.

1636 Differential apparent expression determined by total read counts for promoter windows  
1637 attributed to adjacent RP genes using DEseq2 analysis of individual TSS-seq libraries for WT  
1638 and mutant yeast strains. Lines indicate linear regression lines and dashed lines indicate 95%  
1639 confidence interval of the regression line.

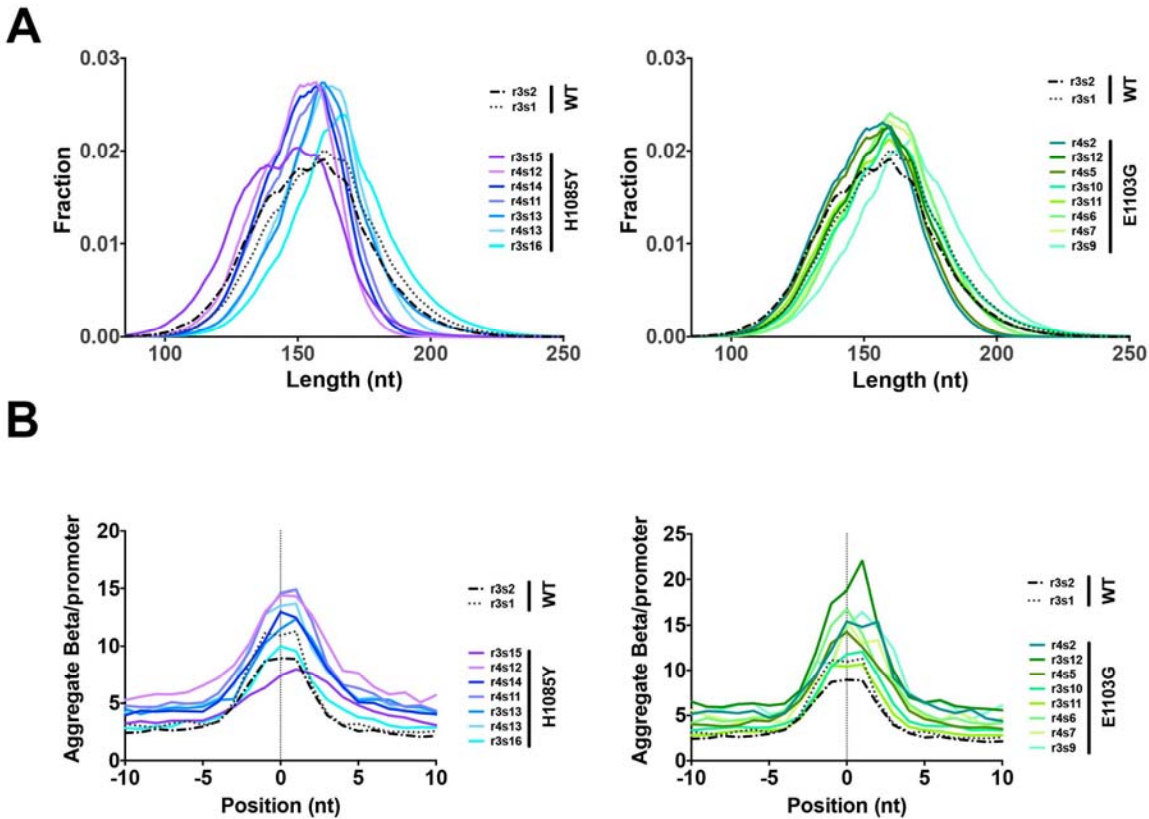

1640  
1641 **Supplemental Figure 9. MNase-seq analyses of nucleosome positions in WT, *rpb1***  
1642 **H1085Y, and *rpb1* E1103G mutants. A.** Paired-end sequencing fragment length distributions in  
1643 WT and H1085Y MNase-seq libraries (left) and in WT (as left, shown for reference) and  
1644 E1103G MNase-seq libraries (right). Libraries arranged within groups from most digested (top)  
1645 to least digested (bottom). **B.** Probability of nucleosome positioning (“Beta”) values determined  
1646 by method of Zhou *et al* for MNase-seq libraries arranged as in (A).

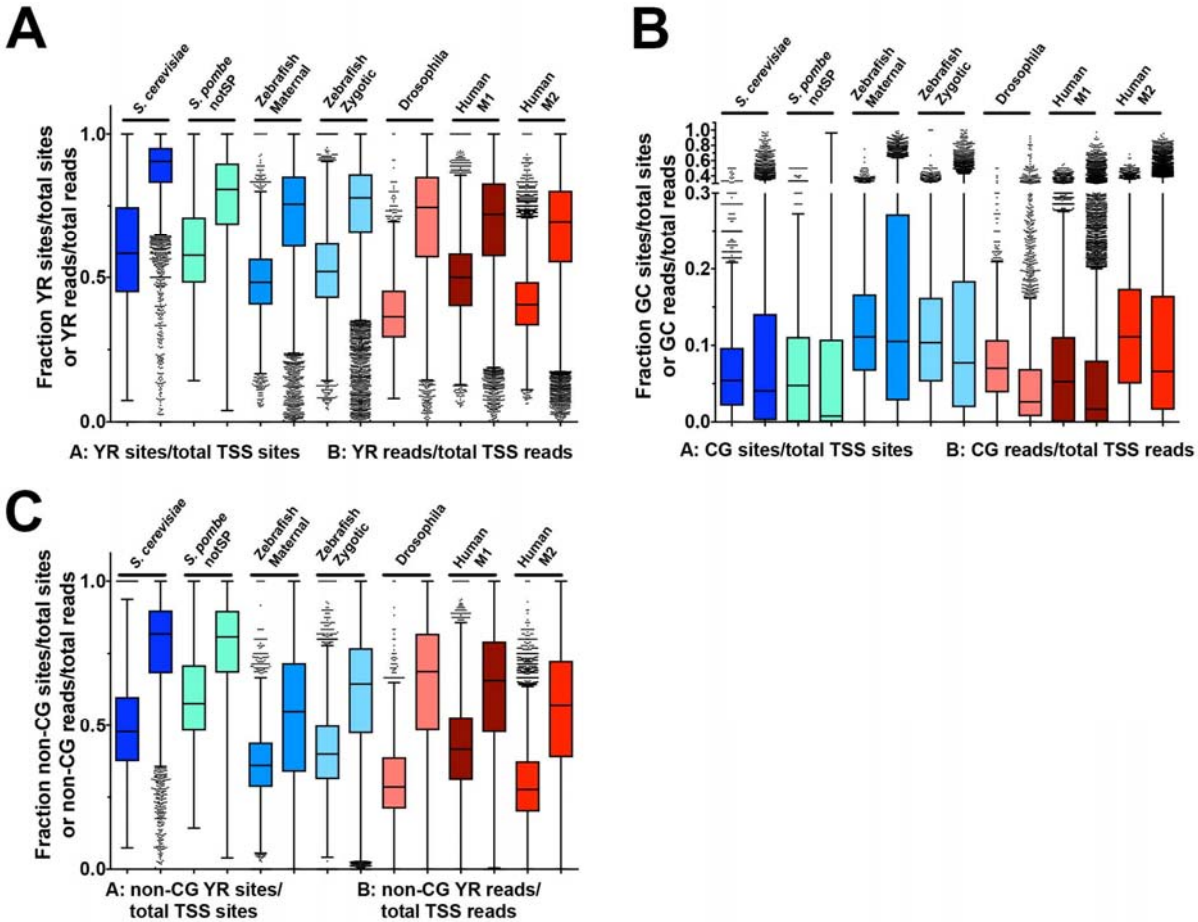

1647  
1648

1649 **Supplemental Figure 10.  $Y_{-1}R_{+1}$  usage preferences for select eukaryotes. A.** Box plots  
1650 indicate fraction of  $Y_{-1}R_{+1}$  TSS sites (left boxes of paired data) or TSS reads (right boxes of  
1651 paired data) relative to total TSS sites or reads observed for promoters with greater than 50  
1652 reads in data sets. Data sets are described in Figure 8. Box plots are Tukey plots (see  
1653 Methods). **B.** Box plots indicate fraction of  $C_{-1}G_{+1}$  TSSs (left boxes of paired data) or TSS reads  
1654 (right boxes of paired data) relative to total TSS sites or reads observed for promoters with  
1655 greater than 50 reads in data sets. Data sets are as in (A). **C.** Box plots indicate fraction of non-  
1656  $C_{-1}G_{+1} Y_{-1}R_{+1}$  TSS sites (left boxes of paired data) or TSS reads (right boxes of paired data)  
1657 relative to total TSS sites or reads observed for promoters with greater than 50 reads in data  
1658 sets. Data sets are as in (A).

1659  
1660

1661

1662



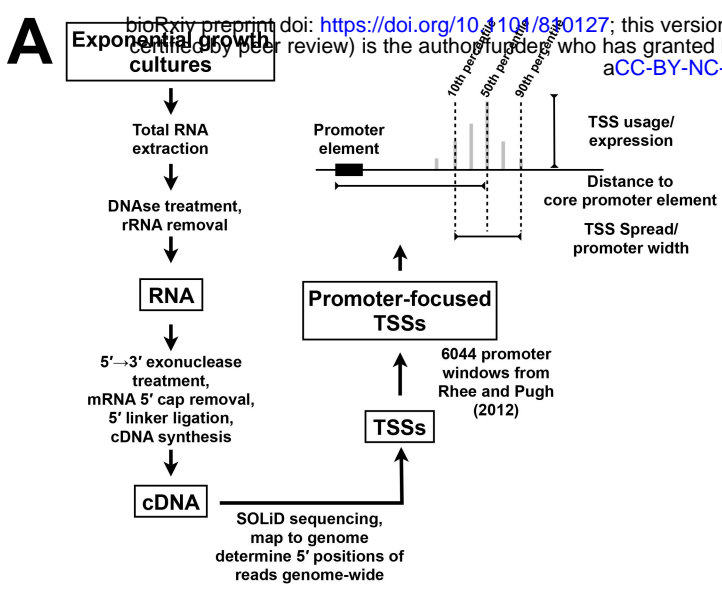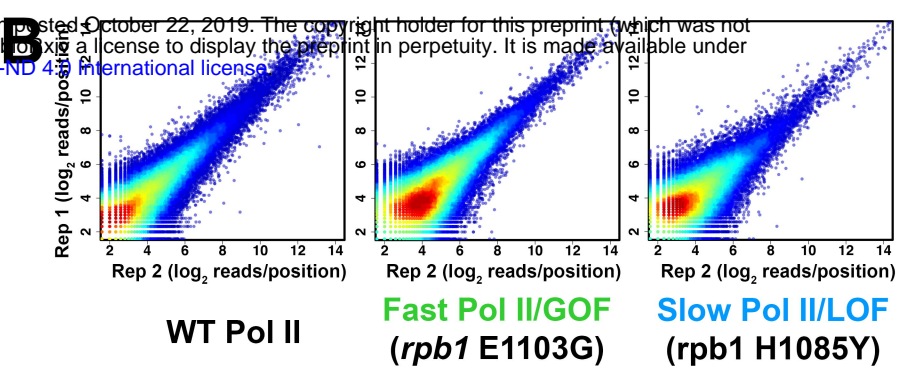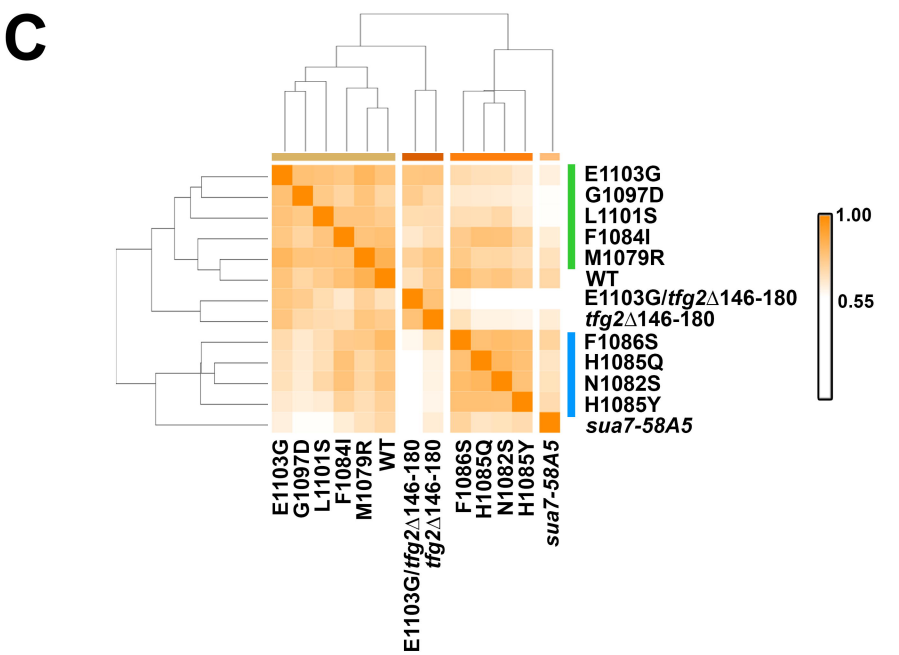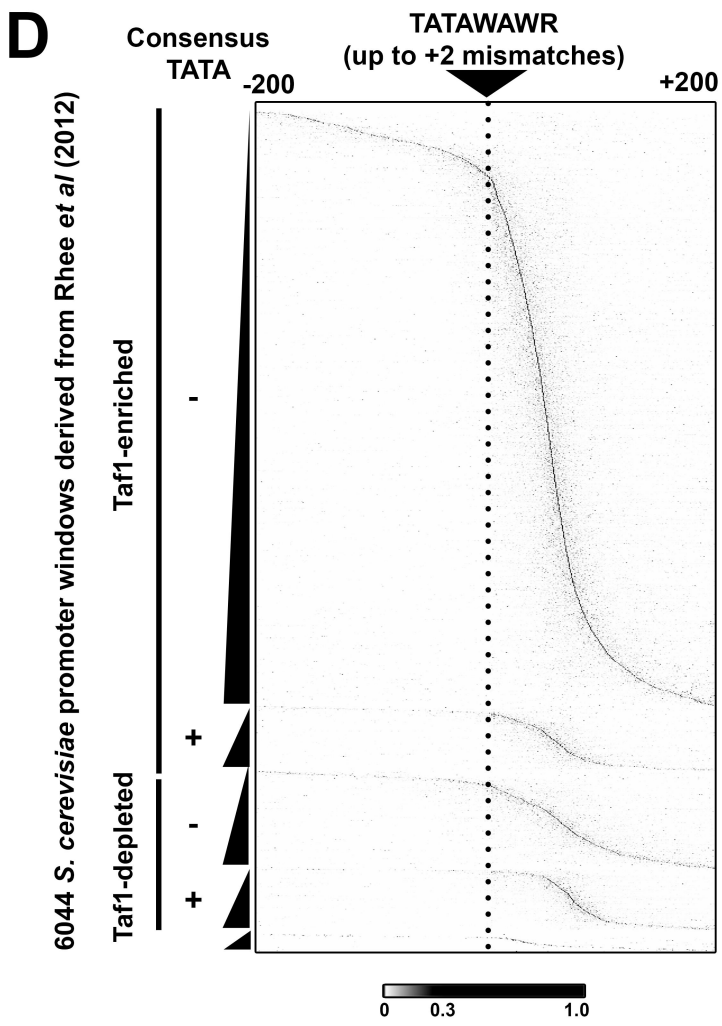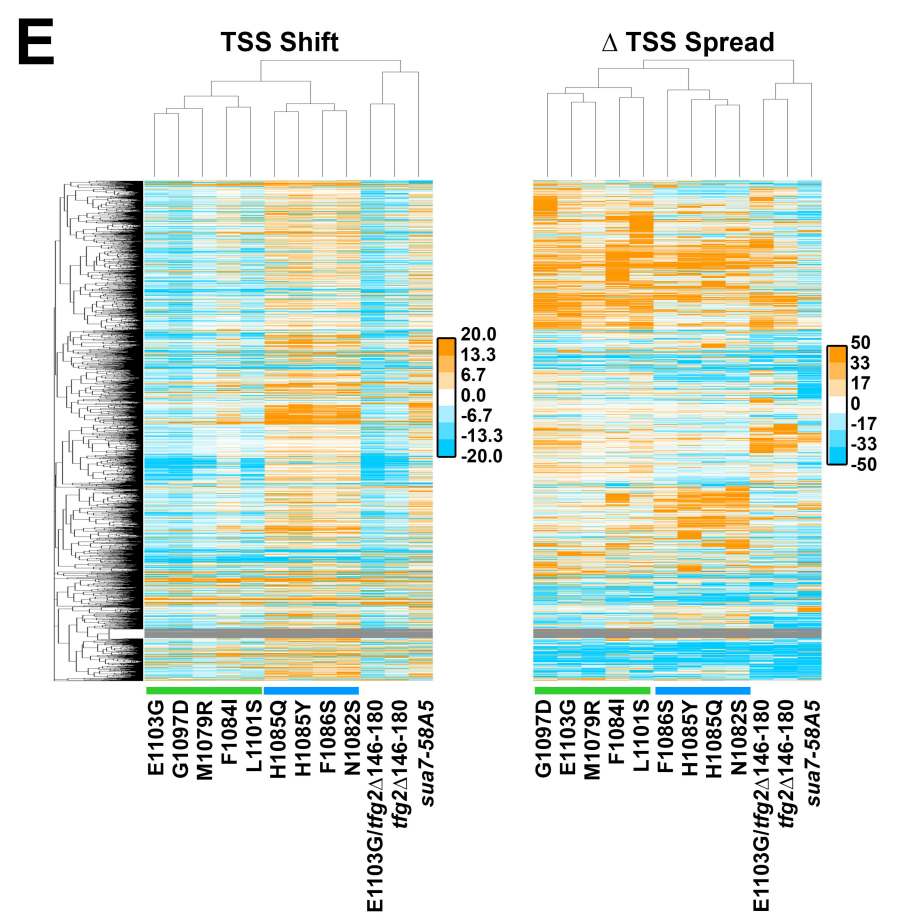

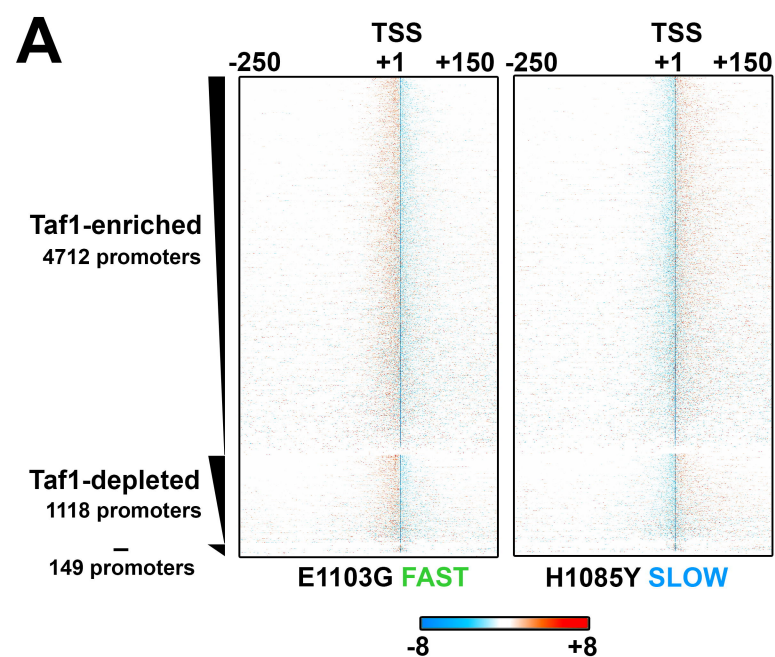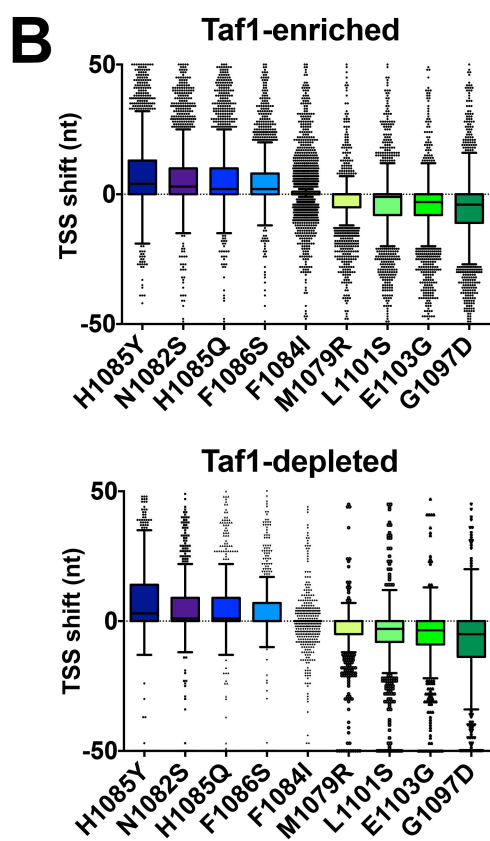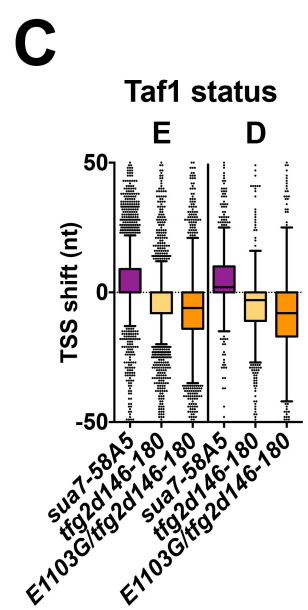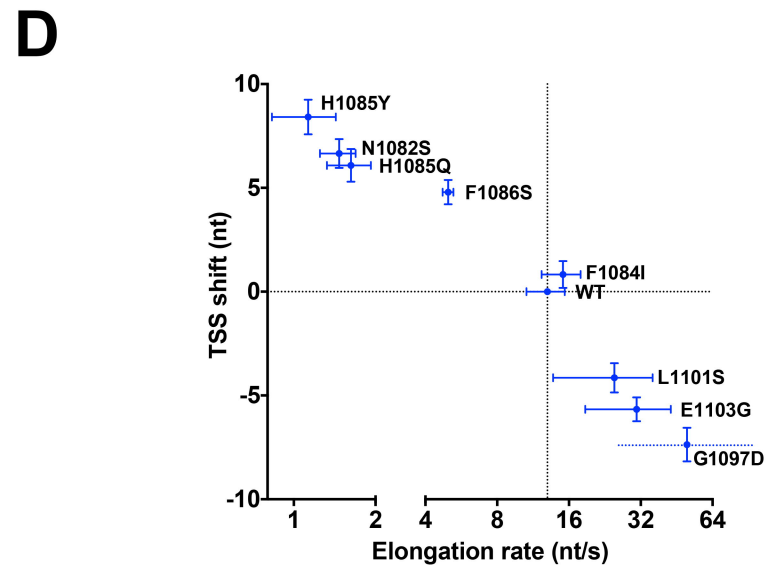

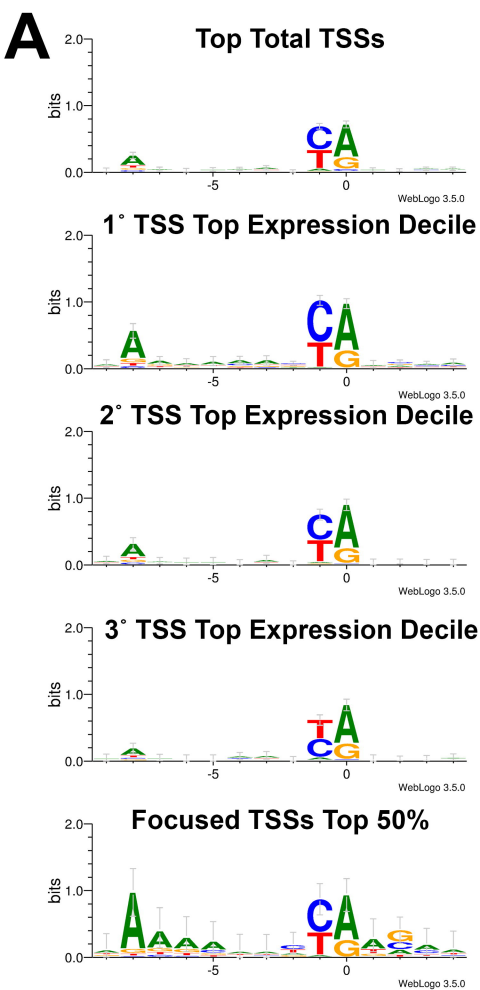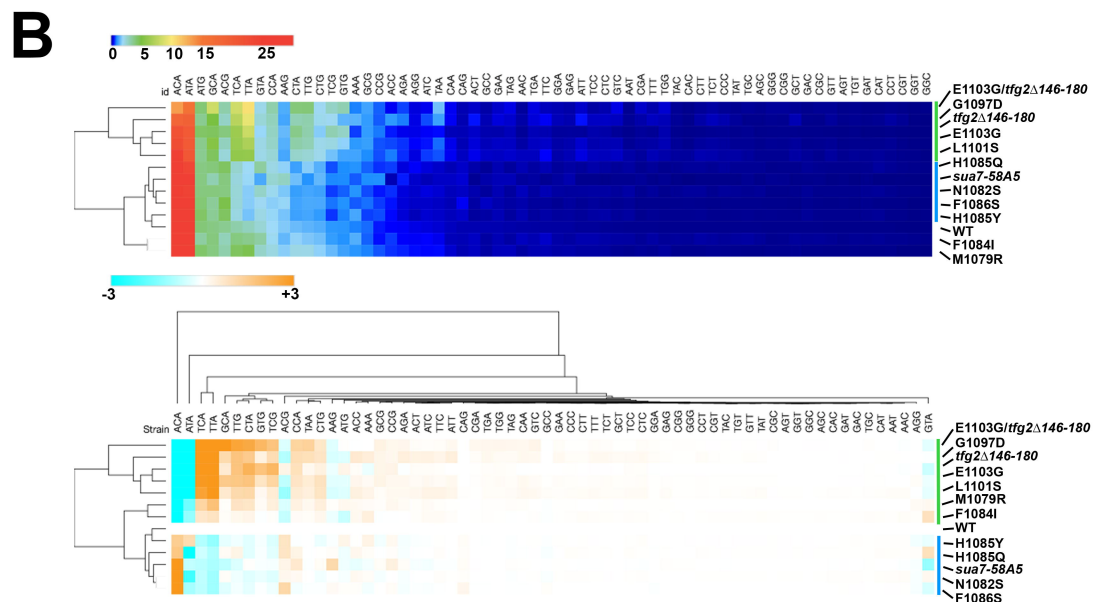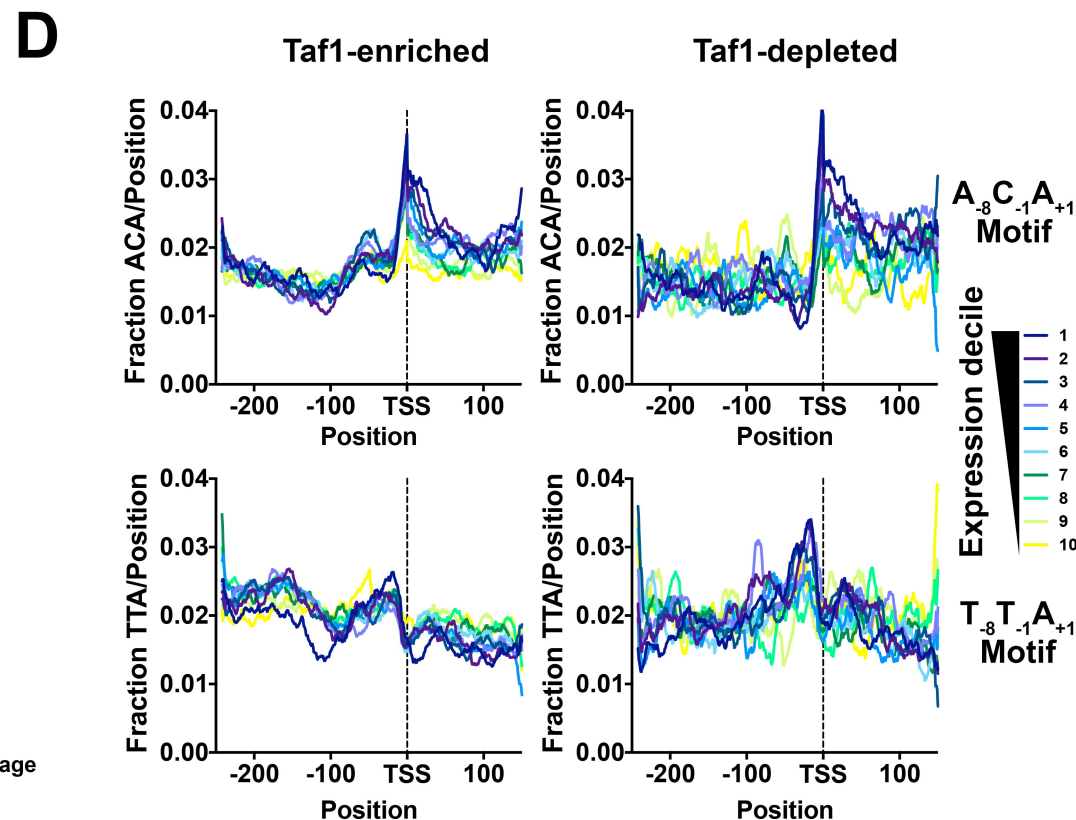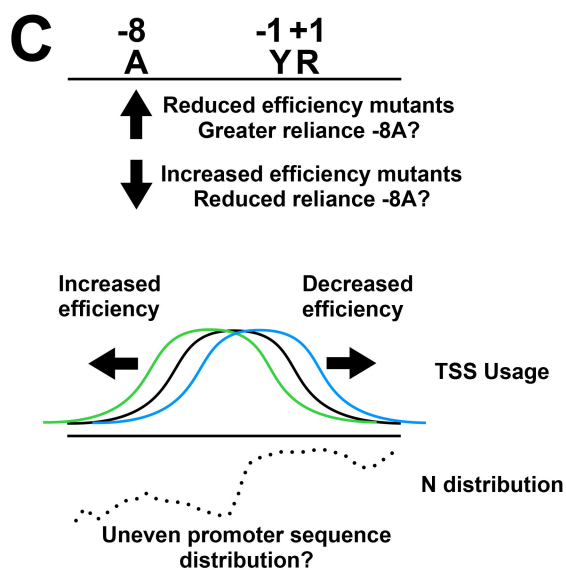



**A****Taf1-enriched****Taf1-depleted**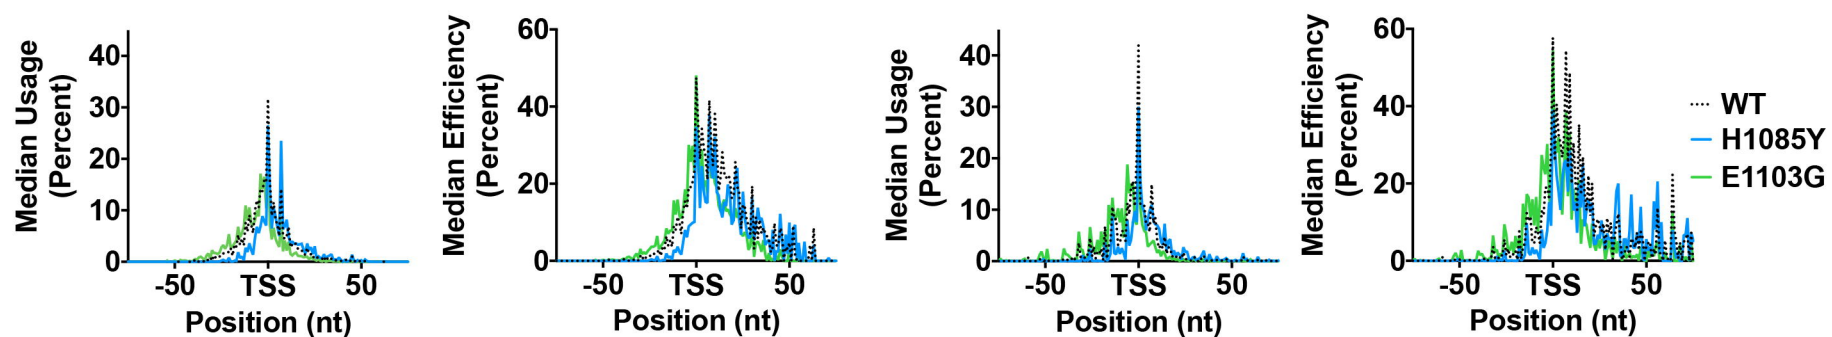

**Median  $N_{-8}N_{-1}N_{+1}$  motif usage/efficiency across promoter positions**

bioRxiv preprint doi: <https://doi.org/10.1101/810127>; this version posted October 22, 2019. The copyright holder for this preprint (which was not certified by peer review) is the author/funder, who has granted bioRxiv a license to display the preprint in perpetuity. It is made available under aCC-BY-NC-ND 4.0 International license.

**B**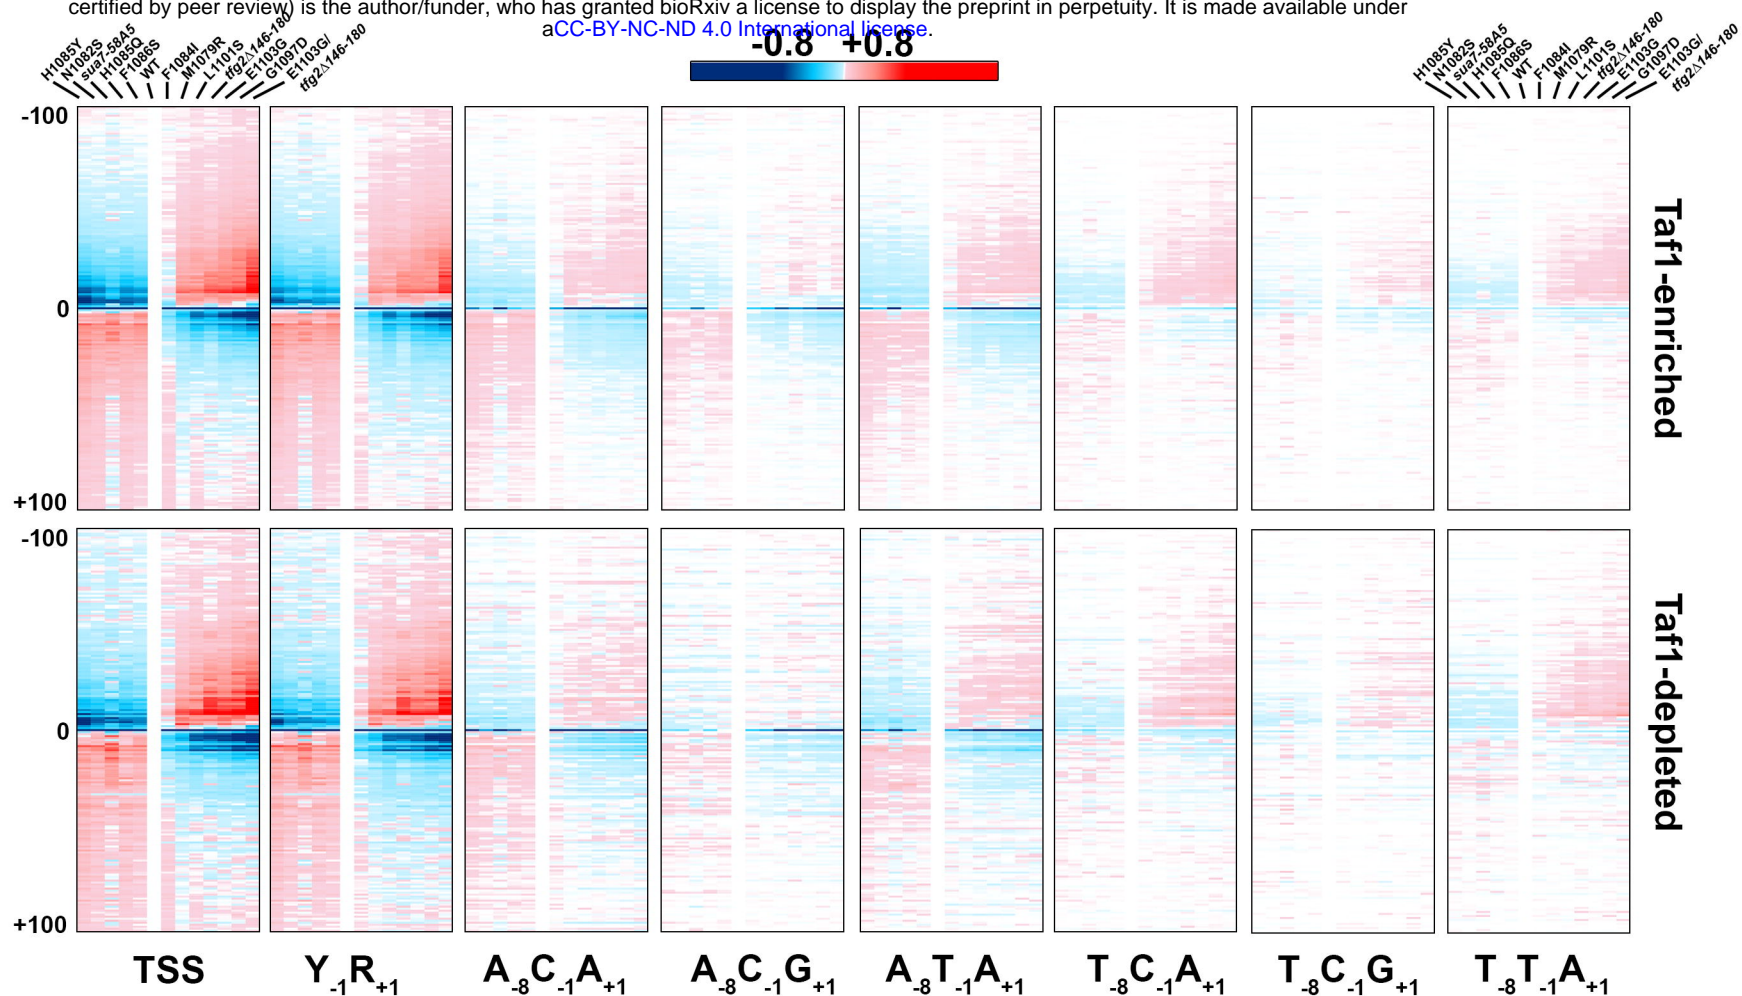**C**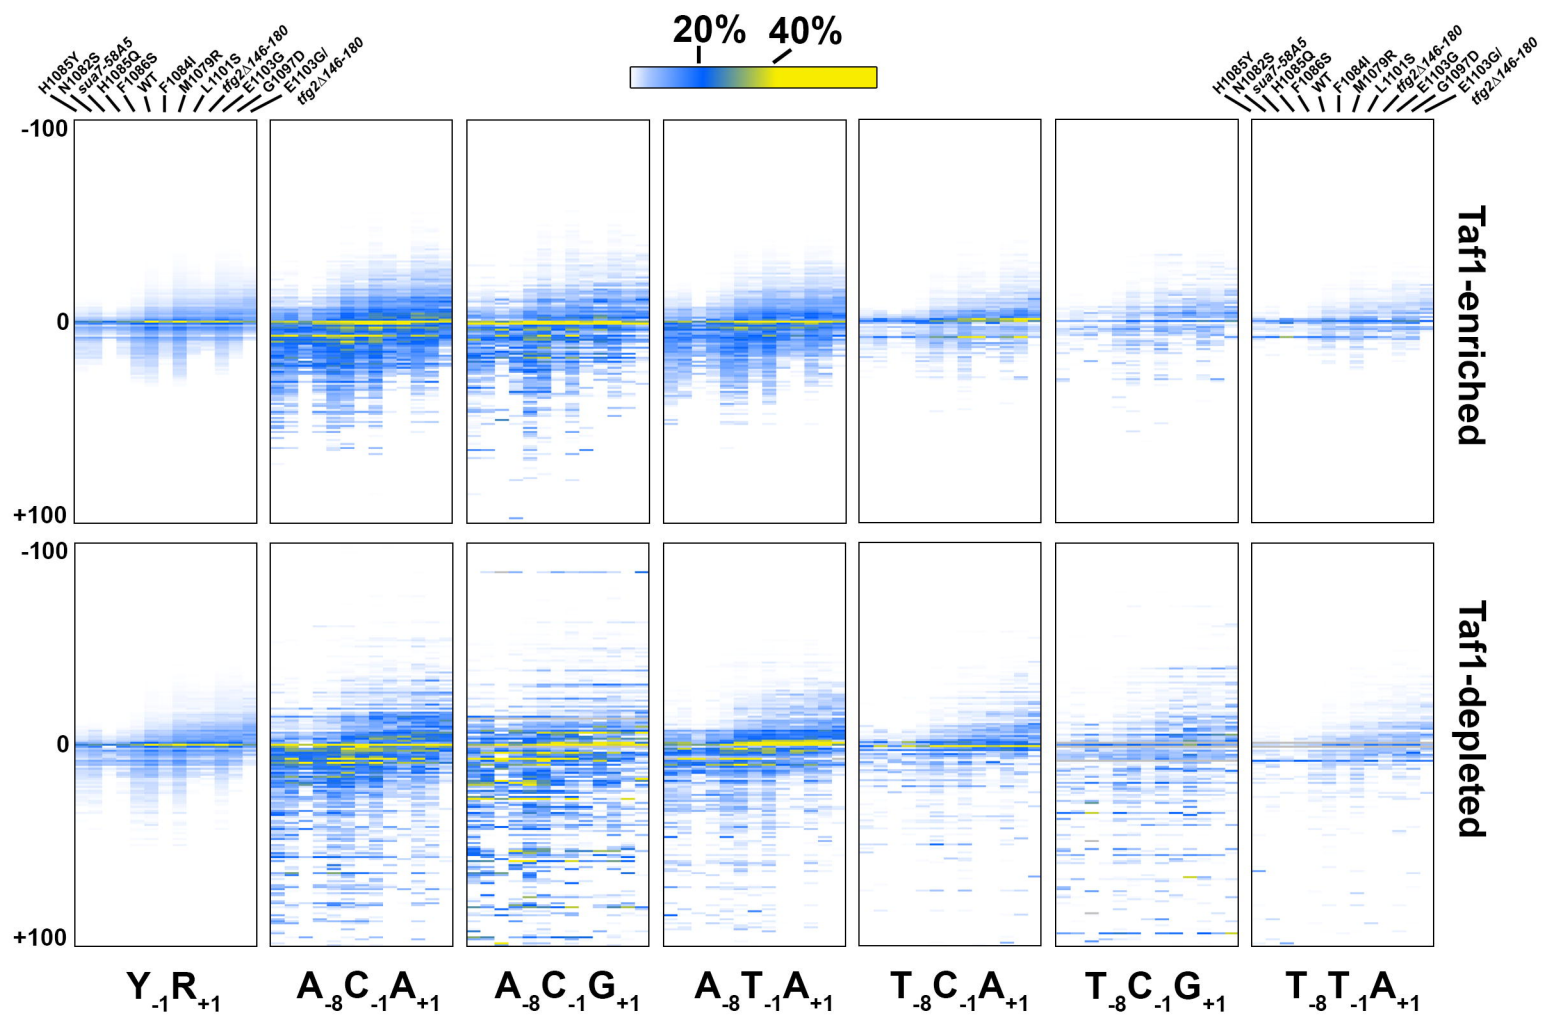



**A**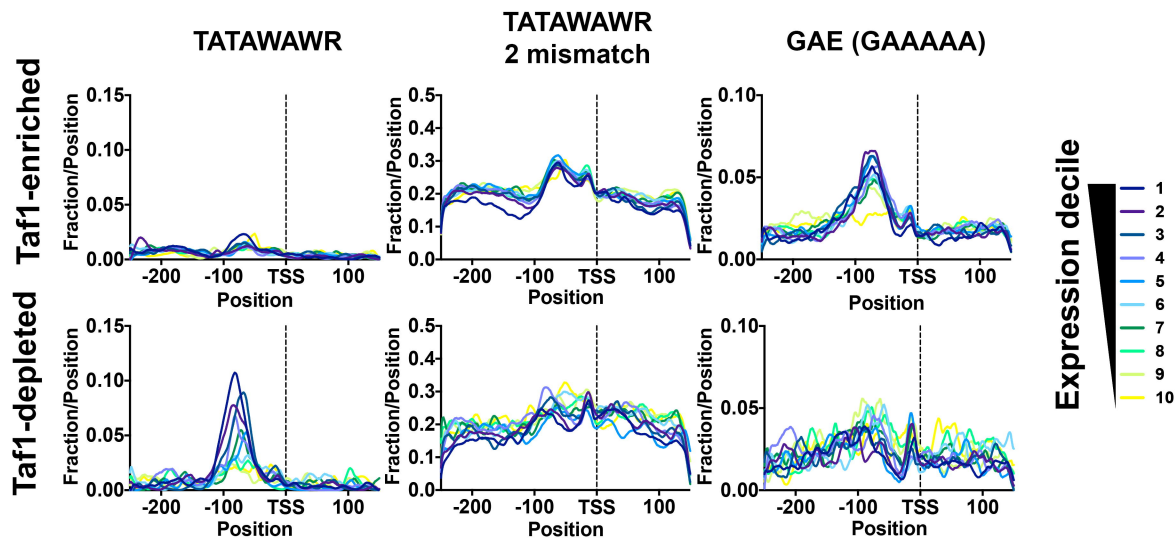**B**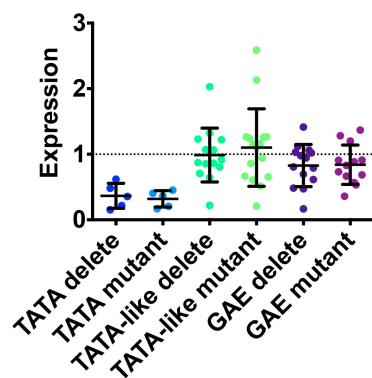**C**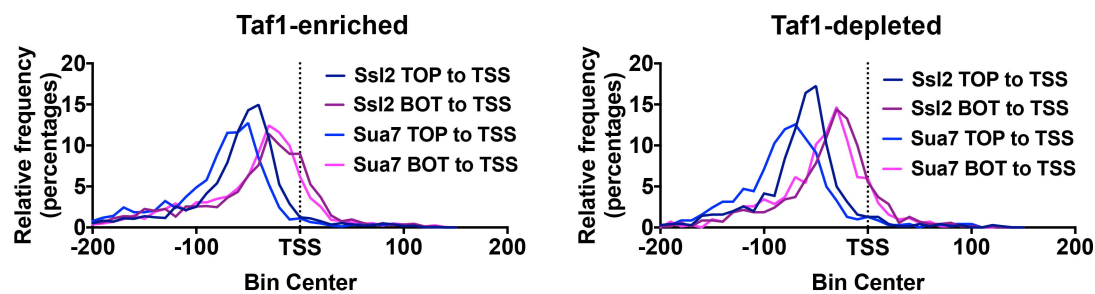**D**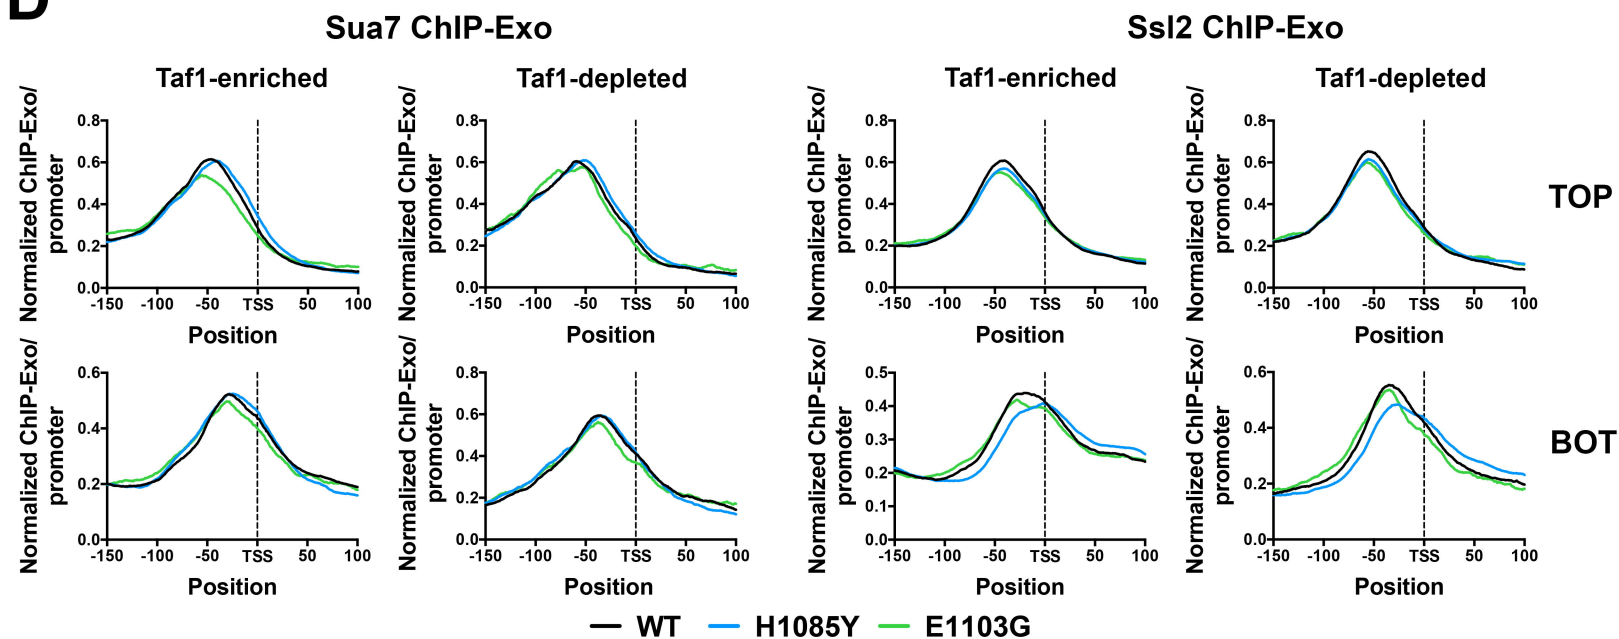

**A**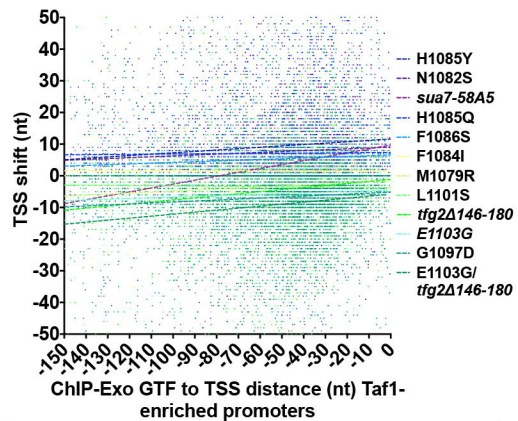**B**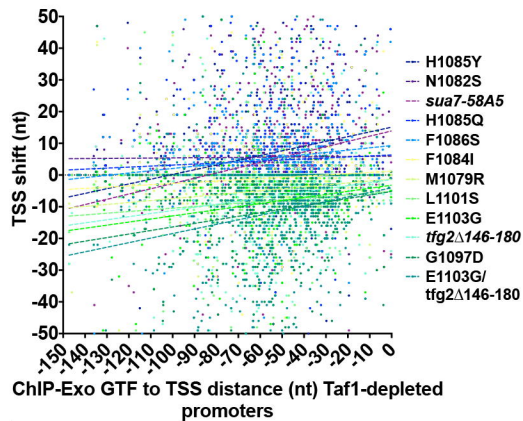**C**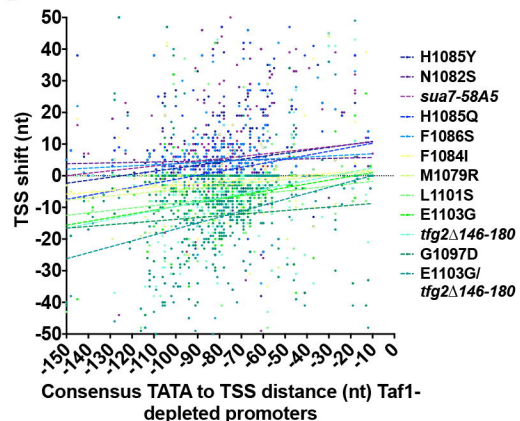**D**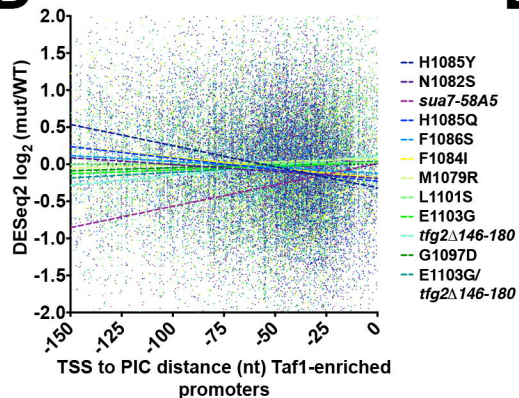**E**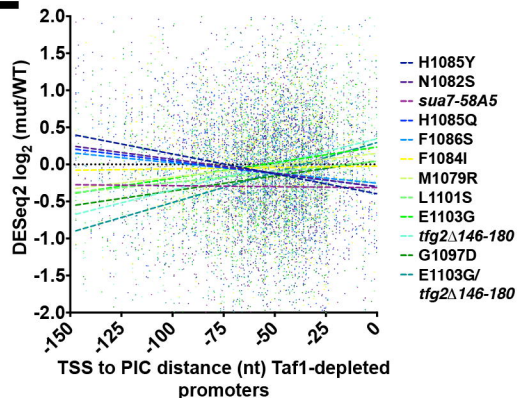

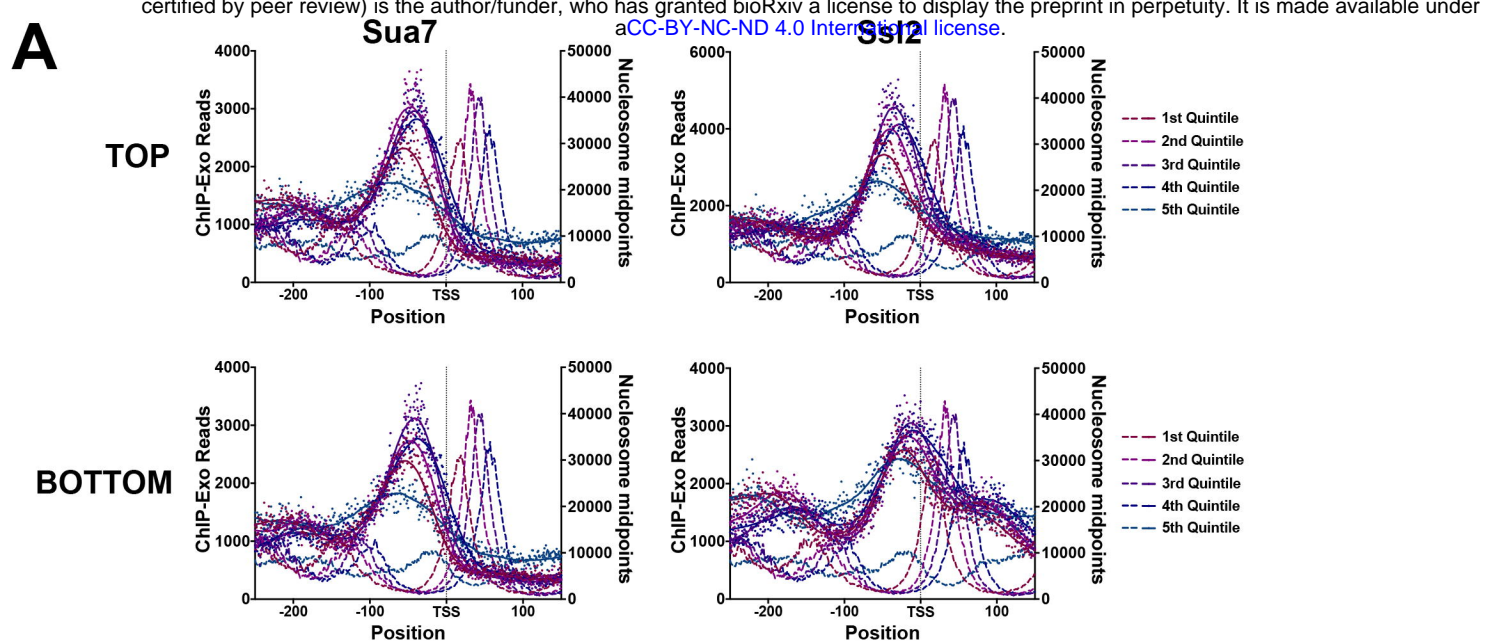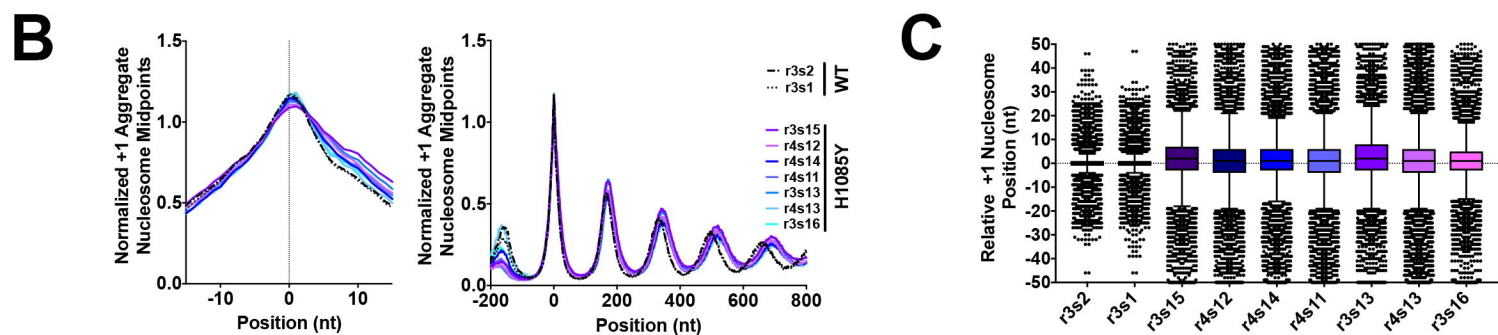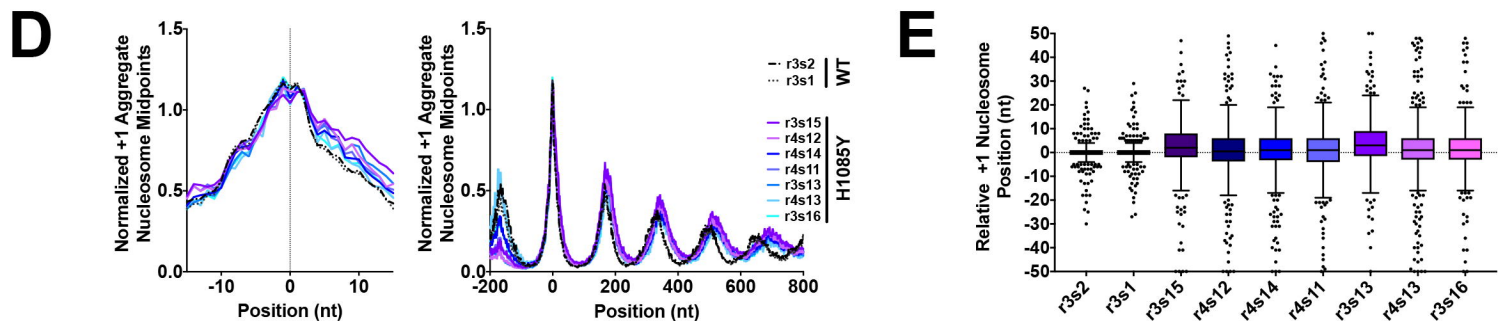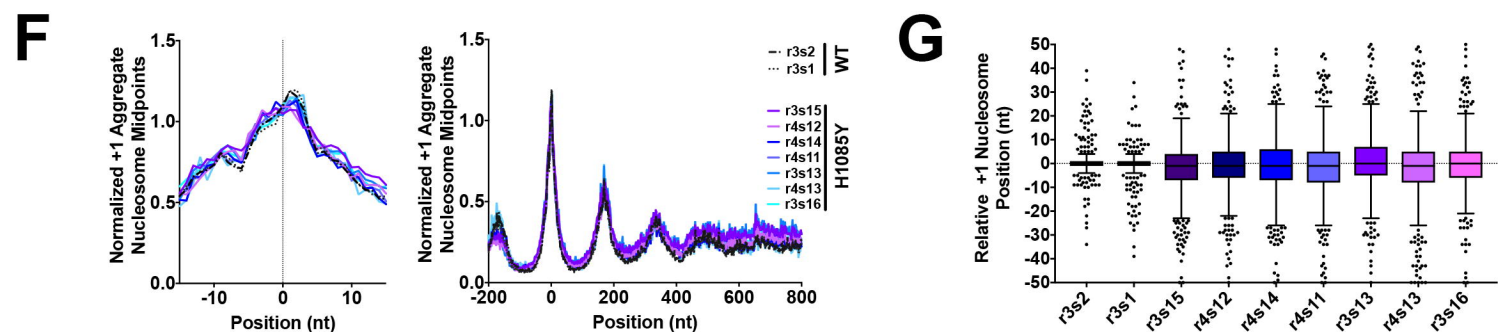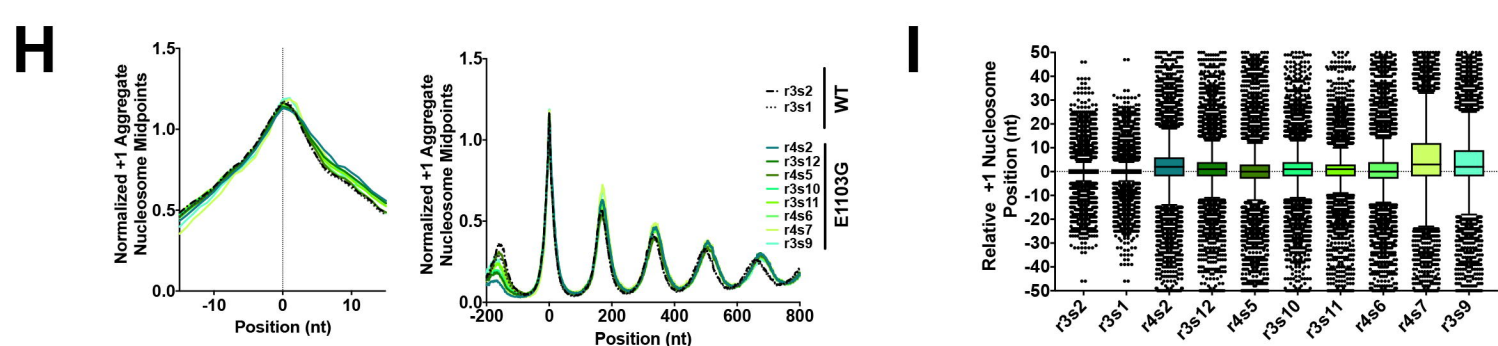



**A****Taf1-Enriched**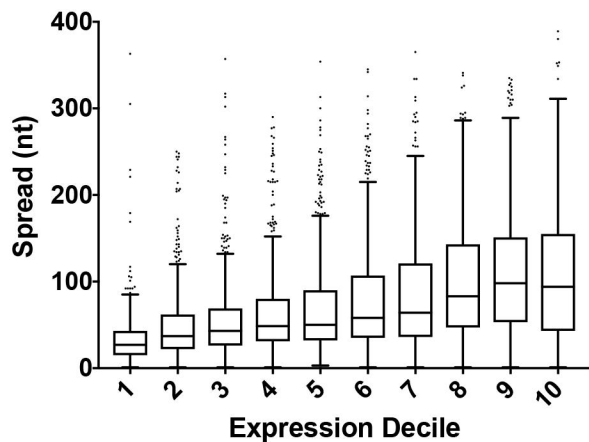**Taf1-Depleted**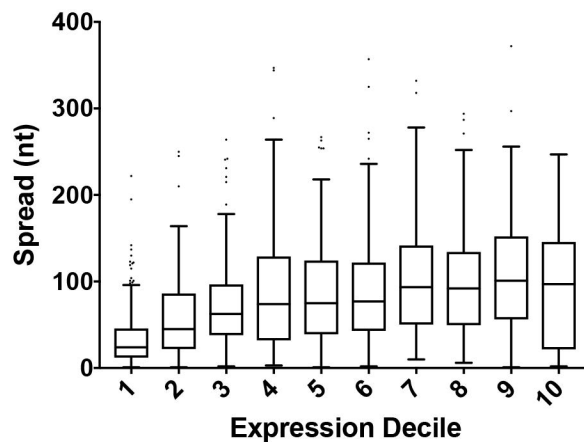**B**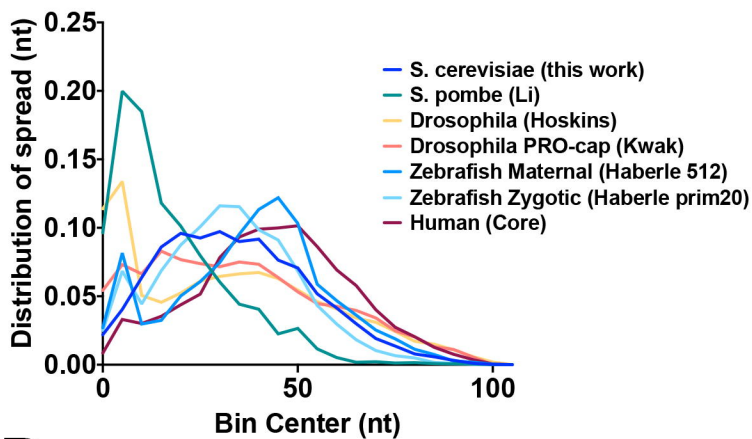**C**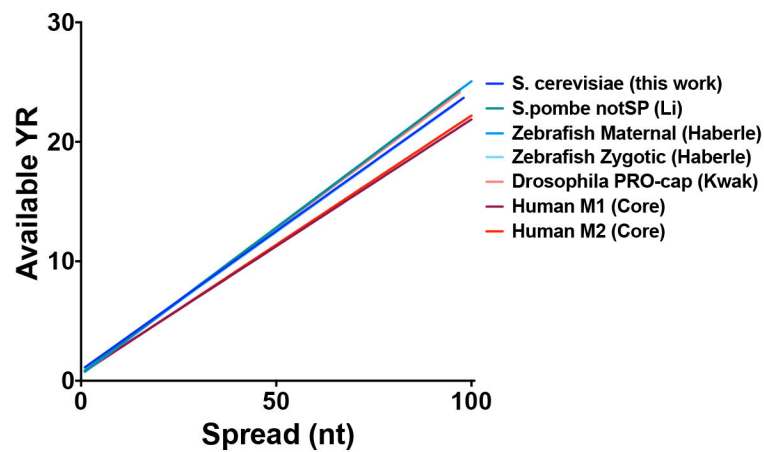**D**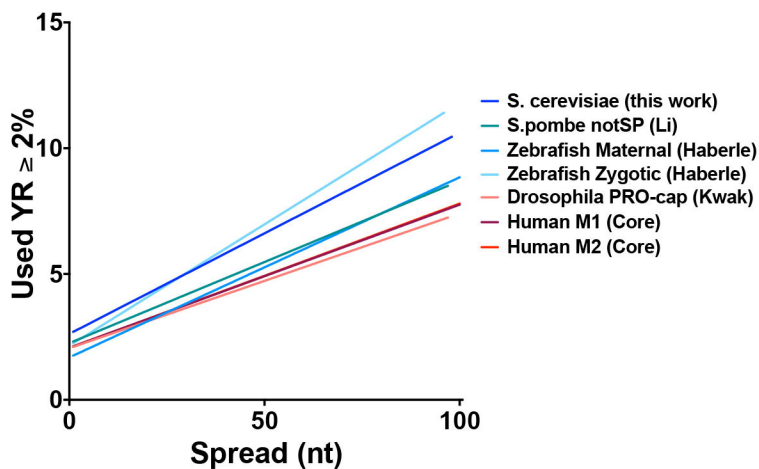**E**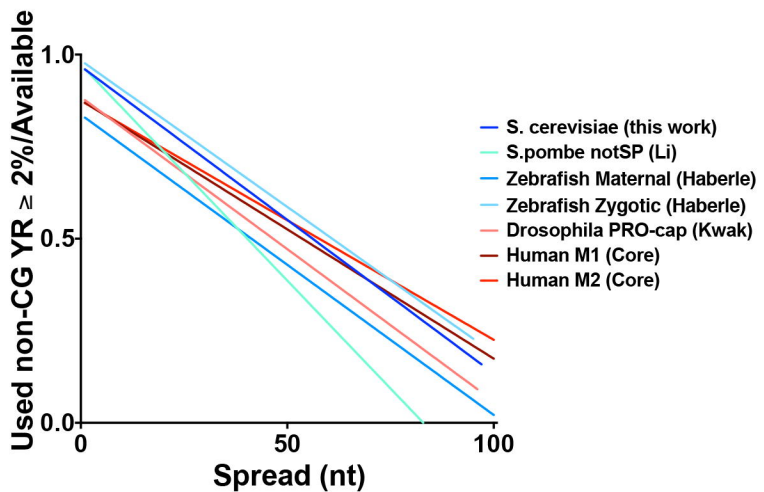

Source: https://www.biorxiv.org/content/10.1101/810127v1.full.pdf
